# Supplementary material for: Binuclear Ni catalyzed ethylene copolymerization with short chain alkenol monomers
Source: Royal Society of Chemistry journal article supplement (doi:10.1039/d4py01480d), 2025-01-01
Supplement: d4py01480d1.pdf [file d4py01480d1.pdf]

## Supporting Information

# **Binuclear Ni catalyzed ethylene copolymerization with short chain alkenol monomers**

Yuan Lu, Gang Ji, Shuyang Yu, Xiaoshan Ning, Xiu-Li Sun\*, Yanshan Gao\*,  
Xiaoyan Wang, Yong Tang\*

State Key Laboratory of Organometallic Chemistry, Shanghai Institute of Organic Chemistry, Chinese Academy of Sciences, 345 Lingling Road, Shanghai 200032, China

Correspondence to: [xlsun@sioc.ac.cn](mailto:xlsun@sioc.ac.cn); [gaoyanshan@sioc.ac.cn](mailto:gaoyanshan@sioc.ac.cn);  
[tangy@sioc.ac.cn](mailto:tangy@sioc.ac.cn)

## Table of Contents

|                                                                                                |     |
|------------------------------------------------------------------------------------------------|-----|
| 1. Materials and Methods .....                                                                 | S3  |
| 2. Synthesis of compounds .....                                                                | S3  |
| 3. General Procedure for Olefin Copolymerizations with Polar Monomer.....                      | S10 |
| 4. Acetylation Procedure for Poly(E- <i>co</i> -Alkenol).....                                  | S10 |
| 5. Supplementary Notes.....                                                                    | S11 |
| 1) NMR Assignments of Poly(E- <i>co</i> -HAA) and Comonomer Content Calculation.....           | S11 |
| 2) NMR Assignments of Poly(E- <i>co</i> -PA) and Comonomer Content Calculation .....           | S13 |
| 3) NMR Assignments of Poly(E- <i>co</i> -DA) and Comonomer Content Calculation.....            | S15 |
| 4) Microstructure Analysis of Poly(E- <i>co</i> -A-ol) and Comonomer Content Calculation ..... | S16 |
| 5) NMR Assignments of Poly(E- <i>co</i> -AAc) and Double Bond Content Calculation .....        | S21 |
| 6) Branching Analysis from <sup>1</sup> H NMR.....                                             | S22 |
| 6. Polymer Characterizations.....                                                              | S22 |
| 1) NMR Spectra of Poly(E- <i>co</i> -HAA) .....                                                | S22 |
| 2) NMR Spectra of Poly(E- <i>co</i> -PA).....                                                  | S31 |
| 3) NMR Spectra of Poly(E- <i>co</i> -DA) .....                                                 | S33 |
| 4) NMR Spectra of Poly(E- <i>co</i> -A-ol).....                                                | S35 |
| 5) NMR Spectra of Poly(E- <i>co</i> -AAc) .....                                                | S37 |
| 6) Representative NMR Spectra of Poly(E- <i>co</i> -Alkenol) after Acetylation .....           | S41 |
| 7) GPC Traces of Polymer Samples .....                                                         | S43 |
| 7. X-ray Crystallography .....                                                                 | S63 |
| References.....                                                                                | S71 |

## 1. Materials and Methods

Toluene, *n*-hexane, dichloromethane (DCM), and tetrahydrofuran (THF) were purified by MBraun SPS-800 system. Polymerization-grade ethylene was purified through an ethylene purification system (developed by the Dalian Institute of Chemical Physics, CAS). Allyl alcohol (A-ol), 3-buten-1-ol (HAA), 4-penten-1-ol (PA), 9-decen-1-ol (DA) were dried over anhydrous CaSO<sub>4</sub> and distilled. Allyl acetate (AAc) was dried over CaH<sub>2</sub> and distilled. Diethylaluminum chloride (DEAC) were purchased from Jiangsu Yongjian Chemical Co., Ltd as neat liquids and diluted with toluene to 1.0 M solutions before use. Poly(*E-co*-HAA), poly(*E-co*-PA) and poly(*E-co*-DA) were acetylated before GPC measurement. **1a** [1], **1b** [1] and **2a** [2] were known and synthesized according to literature. Compounds **3a** and **4a** were reported in our previous work [3].

All air and moisture-sensitive manipulations were carried out under high purity N<sub>2</sub> using standard Schlenk techniques or in a glovebox. <sup>1</sup>H NMR, <sup>13</sup>C NMR, DEPT 135, COSY, HSQC and HMBC spectra were recorded on an Agilent Technologies spectrometer (400 MHz, 600 MHz) or a Varian spectrometer (400 MHz). Elemental analysis was performed by the Analytical Laboratory of the Shanghai Institute of Organic Chemistry (CAS). *M<sub>n</sub>*, *M<sub>w</sub>*, and dispersity index (*Đ*) were determined with Agilent Technologies PL-GPC 220 High temperature Gel Permeation Chromatography at 150 °C (polystyrene calibration, 1,2,4-trichlorobenzene as solvent at 150°C). X-Ray crystallographic data were collected using a Bruker AXSD8 X-ray diffractometer. Mass spectra were obtained using an HP5989A spectrometer.

## 2. Synthesis of compounds

### (1) Synthesis of **3b** and **4b**

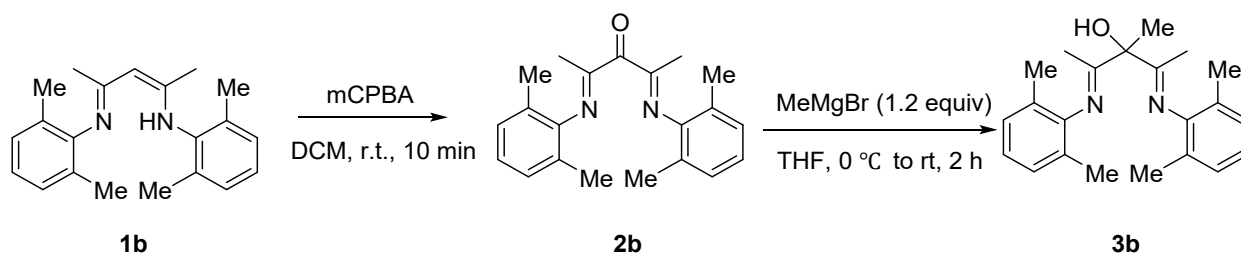

To a solution of compound **1b** (7.7 g, 25.0 mmol) in DCM (200 mL) was added a solution of mCPBA (10.2 g, 50.0 mmol) in DCM (200 mL). The reaction was monitored by TLC. Saturated NaHCO<sub>3</sub>(aq) was added after complete conversion of the substrate (about 10 min). The organic phase was washed with saturated NaHCO<sub>3</sub>(aq) two more times, dried over Na<sub>2</sub>SO<sub>4</sub>, filtered,

concentrated under reduced pressure, and purified by flash chromatography to afford crude **2b** as an orange oil (not stable), which was used in the next step without further purification.

To a solution of the above crude **2b** in 100 mL of anhydrous THF was added a MeMgBr solution (7.7 mL, 23.1 mmol, 3.0 M in Et<sub>2</sub>O) at 0 °C. The reaction mixture was warmed to room temperature and stirred for 2 h being quenched with saturated NH<sub>4</sub>Cl (aq). The organic phase was extracted with ethyl acetate three times. The combined organic layers were washed with brine, dried over Na<sub>2</sub>SO<sub>4</sub>, filtered, and concentrated under reduced pressure. The crude product was recrystallized from MeOH repeatedly until product **3b** was obtained as a white solid (1.4 g, 17%, two steps). **<sup>1</sup>H NMR** (400 MHz, CDCl<sub>3</sub>) δ 7.05-7.03 (m, 4 H), 6.94-6.91 (m, 2 H), 6.16 (s, 1 H), 2.02 (s, 6 H), 1.99 (s, 6 H), 1.82 (s, 6 H), 1.80 (s, 3 H). **<sup>13</sup>C NMR** (101 MHz, CDCl<sub>3</sub>) δ 173.14, 147.39, 128.28, 128.24, 125.98, 125.66, 123.49, 80.27, 24.31, 18.21, 18.15, 15.74. **HR-MS (ESI)** [M+Na]<sup>+</sup> Calcd for C<sub>22</sub>H<sub>28</sub>N<sub>2</sub>ONa, 359.20938; Found, 359.20999.

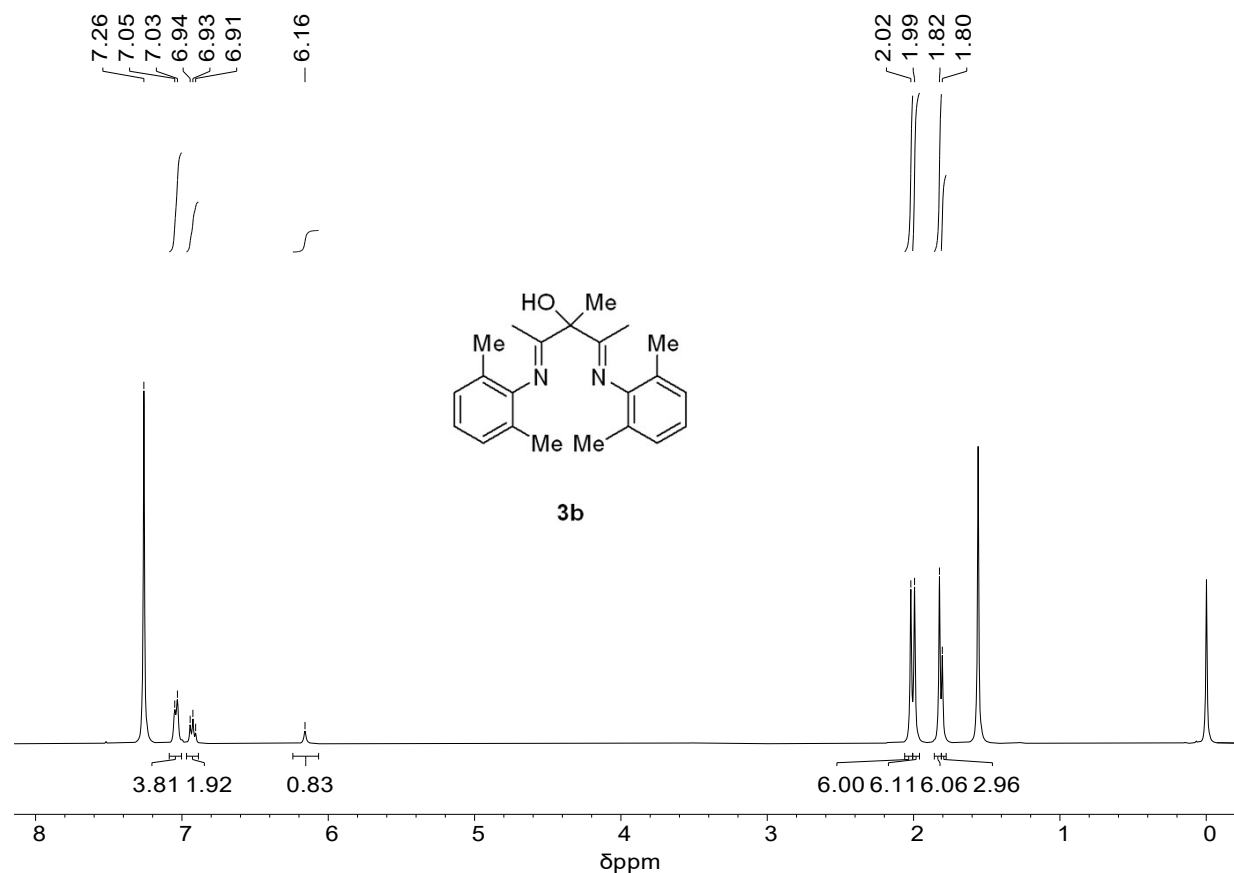

**Figure S1** <sup>1</sup>H NMR spectrum (400 MHz) of **3b** in CDCl<sub>3</sub>.

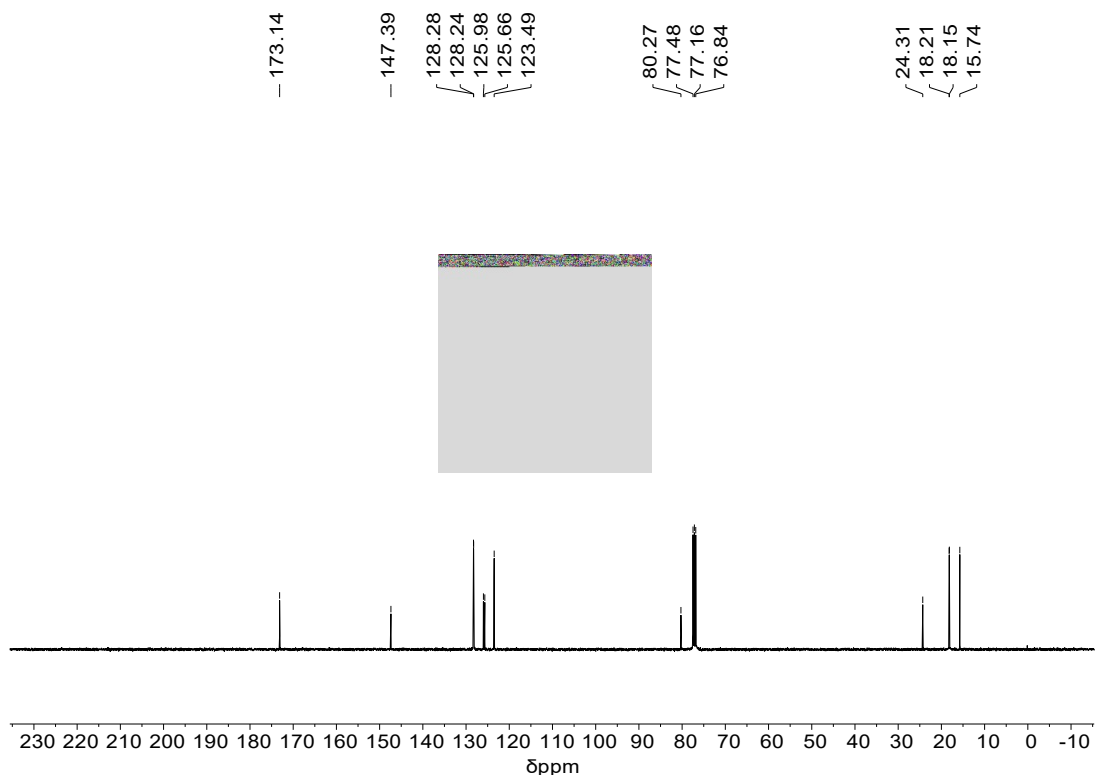

**Figure S2**  $^{13}\text{C}$  NMR spectrum (400 MHz) of **3b** in  $\text{CDCl}_3$ .

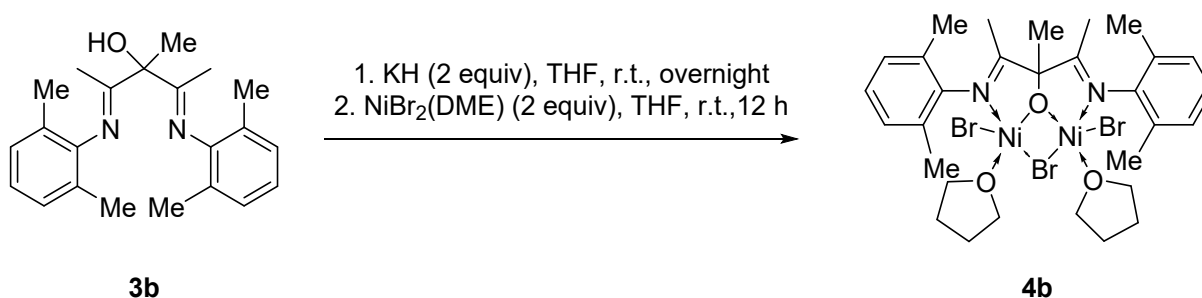

To a suspension of potassium hydride (KH) (0.24 g, 6.0 mmol, 2.0 equiv.) in 10 mL of dry THF was added a solution of **3b** (1.0 g, 3.0 mmol) in 10 mL of THF at room temperature. The resulting suspension was stirred overnight. It was filtered into a suspension of  $\text{NiBr}_2(\text{DME})$  (1.85 g, 6.0 mmol, 2.0 equiv.) in THF at room temperature, and the suspension was stirred for 12 h. The solvent was removed under reduced pressure, and the residue was dissolved in dry DCM. After filtration, the filtrate was concentrated under reduced pressure and the residue was dissolved in THF for recrystallization to afford the product **4b** (red solid, 1.83 g, 73%). Anal. Calcd. for  $\text{C}_{30}\text{H}_{43}\text{Br}_3\text{N}_2\text{Ni}_2\text{O}_3$  (two THF coordination): C, 43.06; H, 5.18; N, 3.35; Found: C, 42.95; H, 5.20; N, 3.37.

(2) Synthesis of **3c** and **4c**

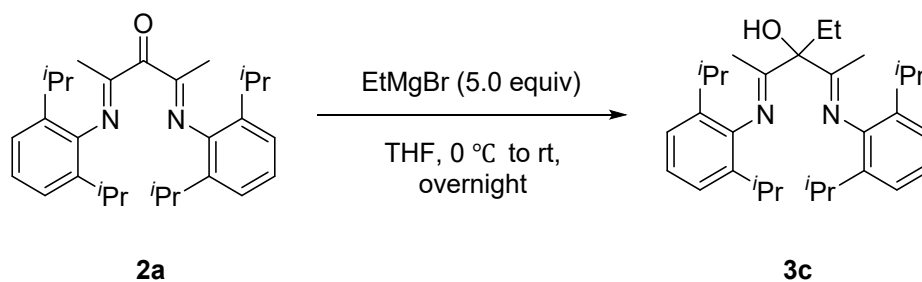

To a solution of compound **2a** (6.5 g, 15.1 mmol) in 75 mL of anhydrous THF was added an EtMgBr solution (25.0 mL, 75.5 mmol, 3.0 M in Et<sub>2</sub>O) at 0 °C. The reaction mixture was warmed to room temperature and stirred overnight before being quenched with saturated NH<sub>4</sub>Cl(aq). The organic phase was extracted with ethyl acetate three times. The combined organic layers were washed with brine, dried over Na<sub>2</sub>SO<sub>4</sub>, filtered, and concentrated under reduced pressure. The product and unreacted substrate were isolated by flash chromatography. The recovered substrate (4.0 g, 61%) was processed in the same way as above to obtain more products. The products of two batches were combined and recrystallized from MeOH to afford the product **3c** as a white solid (1.4 g, 20% overall two batches). <sup>1</sup>H NMR (400 MHz, CDCl<sub>3</sub>) δ 7.16-7.14 (m, 4 H), 7.11-7.07 (m, 2H), 6.13 (s, 1 H), 2.69 (hep, *J* = 7.1 Hz, 4 H), 2.38 (q, *J* = 7.2 Hz, 2H), 1.84 (s, 6H), 1.17-1.12 (m, 24H), 1.05 (t, *J* = 7.2 Hz, 3H). <sup>13</sup>C NMR (101 MHz, CDCl<sub>3</sub>) δ 173.00, 145.13, 136.28, 136.09, 124.12, 123.20, 123.16, 83.50, 29.68, 28.19, 28.16, 23.64, 23.53, 23.20, 22.78, 16.16, 7.84. HR-MS (ESI) [M+H]<sup>+</sup> Calcd for C<sub>31</sub>H<sub>47</sub>ON<sub>2</sub>, 463.3683; Found, 463.3682.

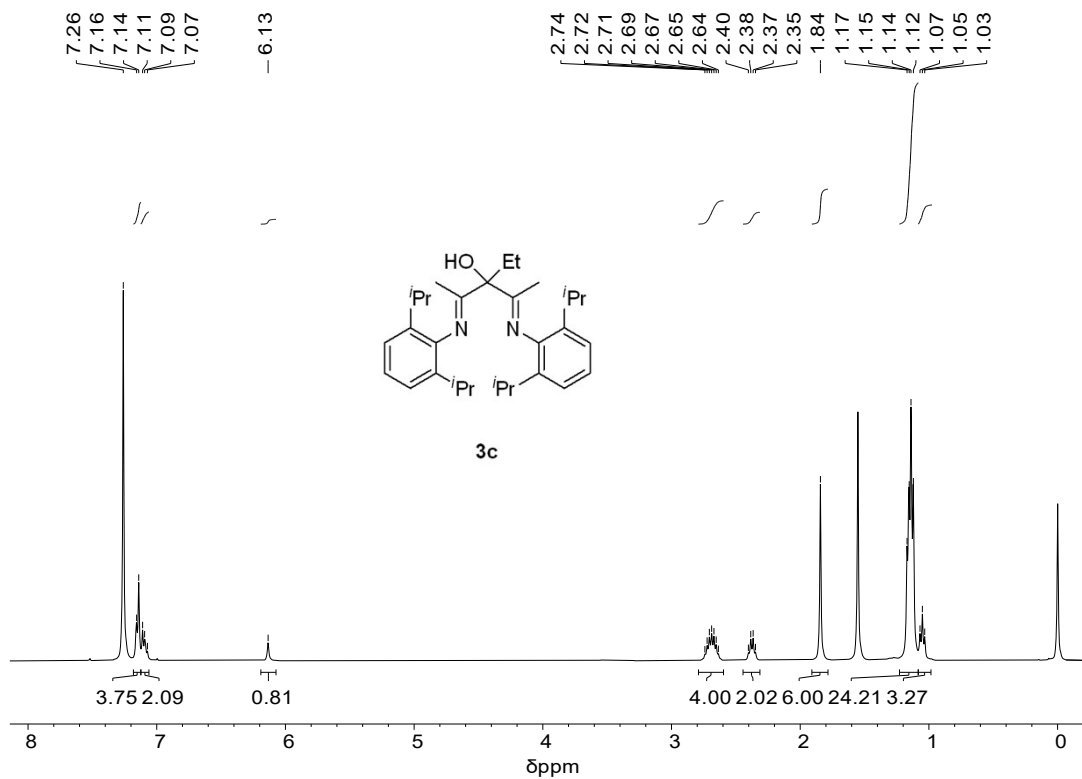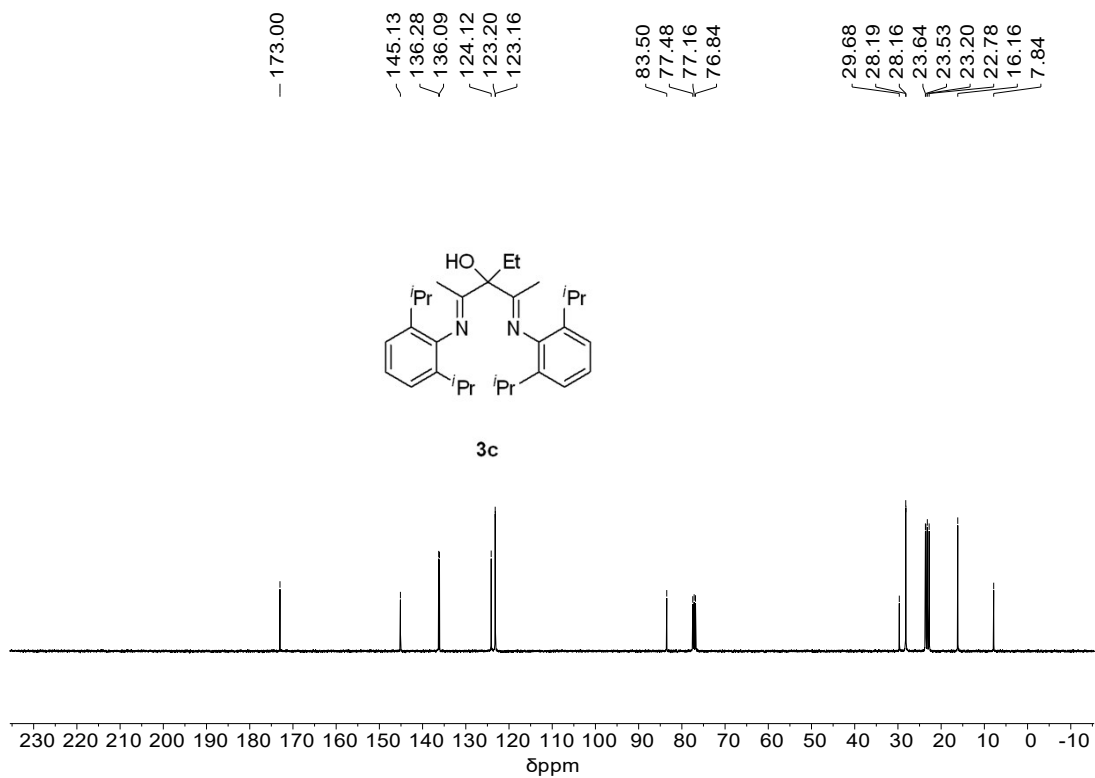

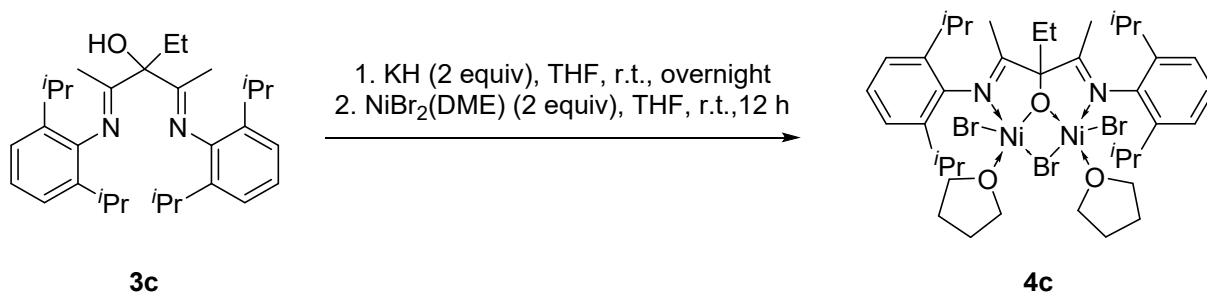

To a suspension of potassium hydride (KH) (0.08 g, 2.0 mmol, 2.0 equiv.) in 10 mL of dry THF was added a solution of **3c** (0.46 g, 1.0 mmol) in 10 mL of THF at room temperature. The resulting suspension was stirred overnight. It was filtered into a suspension of  $\text{NiBr}_2(\text{DME})$  (0.62 g, 2.0 mmol, 2.0 equiv.) in THF at room temperature, and the suspension was stirred for 12 h. The solvent was removed under reduced pressure, and the residue was dissolved in dry DCM. After filtration, the filtrate was concentrated under reduced pressure, and the residue was dissolved in THF for recrystallization to afford the product **4c** (yellow solid, 0.63 g, 65%). Anal. Calcd. for  $\text{C}_{35}\text{H}_{53}\text{Br}_3\text{N}_2\text{Ni}_2\text{O}_2$  (one THF coordination): C, 47.19; H, 6.00; N, 3.14; Found: C, 47.34; H, 6.18; N, 3.15.

### (3) Synthesis of **3d** and **4d**

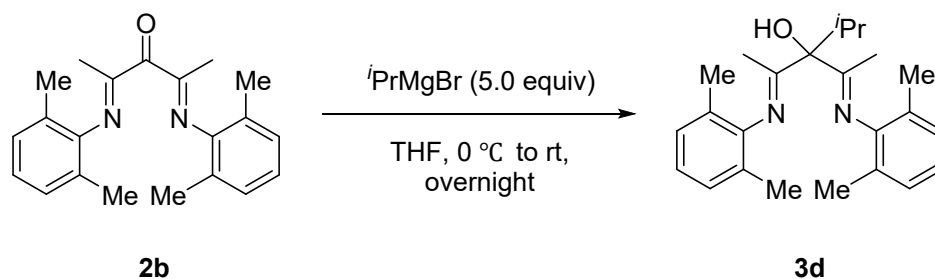

To a solution of compound **2b** (5.9 g, 18.3 mmol) in 100 mL of anhydrous THF was added an  $i\text{PrMgBr}$  solution (33.0 mL, 91.5 mmol, 2.8 M in 2-methyltetrahydrofuran) at 0 °C. The reaction mixture was warmed to room temperature and stirred overnight before being quenched with saturated  $\text{NH}_4\text{Cl}(\text{aq})$ . The organic phase was extracted with ethyl acetate three times. The combined organic layers were washed with brine, dried over  $\text{Na}_2\text{SO}_4$ , filtered, and concentrated under reduced pressure. The crude product was recrystallized from MeOH to afford the product **3b** as a white solid (1.9 g, 29%).  $^1\text{H NMR}$  (400 MHz,  $\text{CDCl}_3$ )  $\delta$  7.05-7.02 (m, 4 H), 6.94-6.91 (m, 2 H), 6.01 (s, 1 H), 3.09 (hep,  $J = 6.6$  Hz, 1 H), 2.04 (s, 6 H), 1.99 (s, 6 H), 1.88 (s, 6 H), 1.09 (d,  $J = 6.6$  Hz, 6 H).  $^{13}\text{C NMR}$  (101 MHz,  $\text{CDCl}_3$ )  $\delta$  173.81, 147.64, 128.43, 128.37, 126.14, 125.82, 123.52, 85.58, 33.28, 19.00, 18.89, 17.73, 16.64. **HR-MS (ESI)**  $[\text{M}+\text{Na}]^+$  Calcd for  $\text{C}_{24}\text{H}_{32}\text{N}_2\text{ONa}$ , 387.24068; Found, 387.24036.



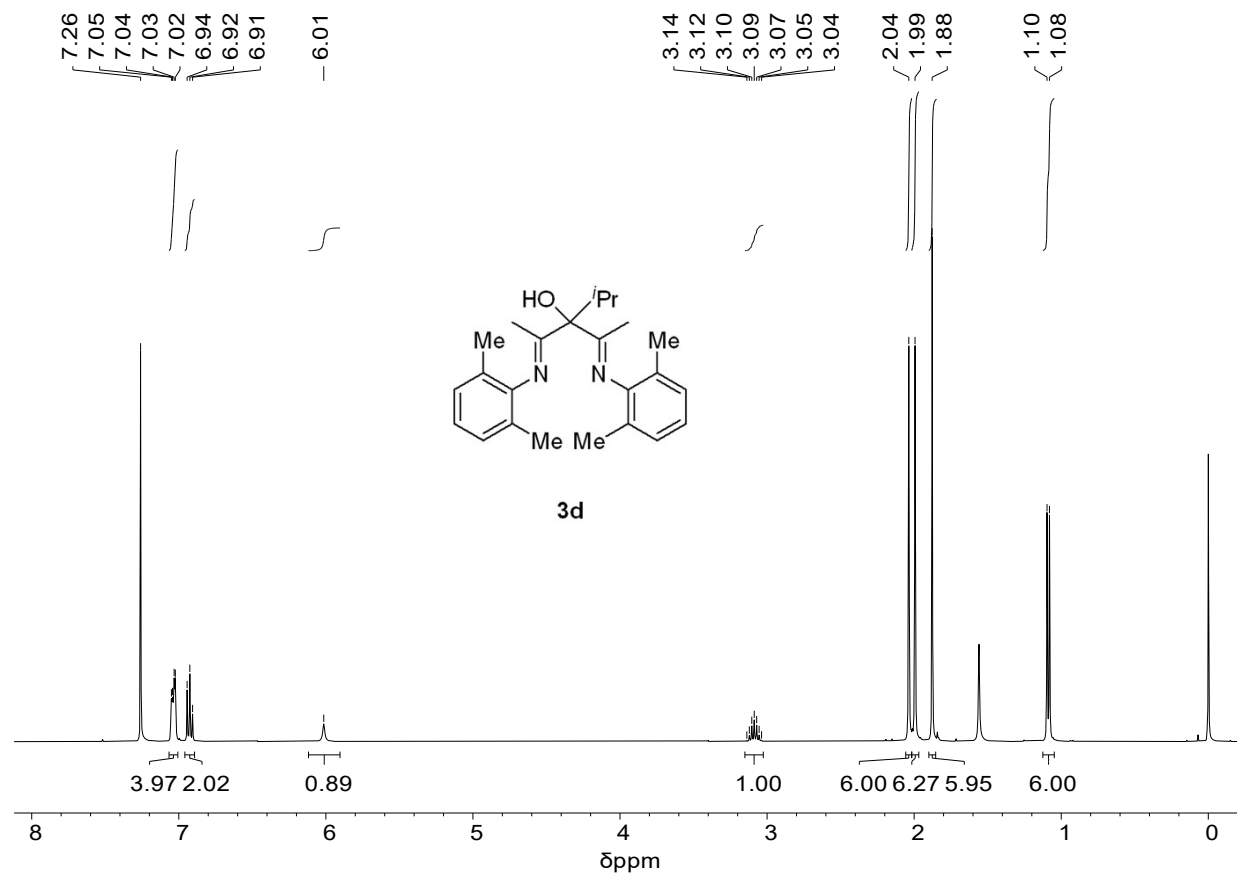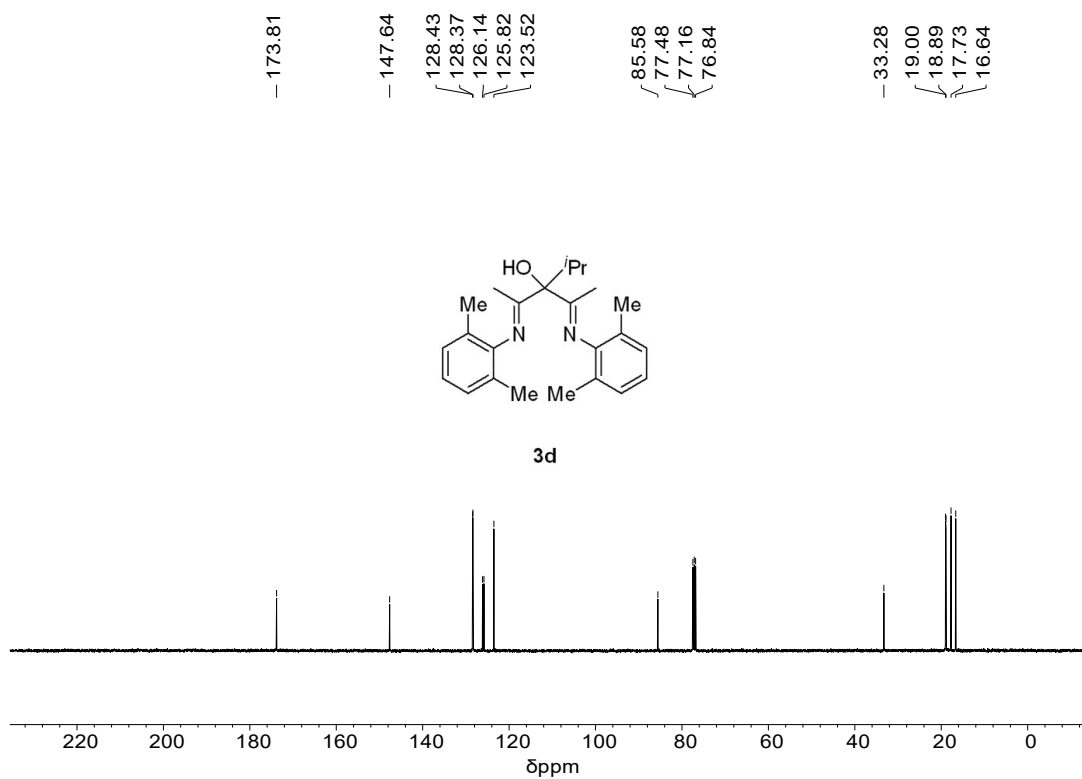

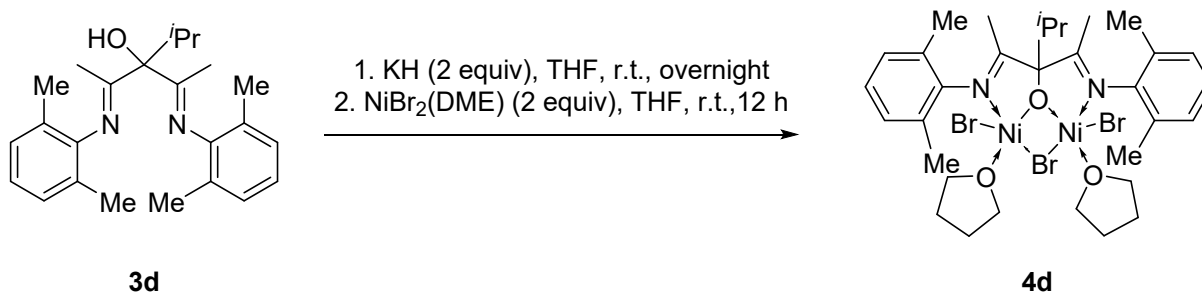

To a suspension of potassium hydride (KH) (0.08 g, 2.0 mmol, 2.0 equiv.) in 10 mL of dry THF was added a solution of **3d** (0.36 g, 1.0 mmol) in 10 mL of THF at room temperature. The resulting suspension was stirred overnight. It was filtered into a suspension of NiBr<sub>2</sub>(DME) (0.62 g, 2.0 mmol, 2.0 equiv.) in THF at room temperature, and the suspension was stirred for 12 h. The solvent was removed under reduced pressure, and the residue was dissolved in dry DCM. After filtration, the filtrate was concentrated under reduced pressure, and the residue was dissolved in THF for recrystallization to afford the product **4d** (red solid, 0.40 g, 46%). Anal. Calcd. for C<sub>32</sub>H<sub>47</sub>Br<sub>3</sub>N<sub>2</sub>Ni<sub>2</sub>O<sub>3</sub> (two THF coordination): C, 44.44; H, 5.48; N, 3.24; Found: C, 44.43; H, 5.57; N, 3.38.

### 3. General Procedure for Olefin Copolymerizations with Polar Monomer

Under 1 atm of ethylene, a flame-dried two-necked flask equipped with a stir bar was charged with the desired amount of toluene and DEAC solution at desired temperature. After 10 min, the polar monomer was added dropwise. The mixture was stirred for 10 min, and the desired amount of Ni catalyst in toluene was added to initiate polymerization. The reaction was quenched by pouring it into 250 mL of acidified methanol (concentrated HCl/MeOH, 1/10, v/v) and stirred at room temperature overnight. The precipitated polymer was collected, washed with methanol, and dried under vacuum at 60 °C to a constant weight.

### 4. Acetylation Procedure for Poly(E-co-Alkenol)

To a round-bottom flask equipped with a stir bar was added the poly(E-co-alkenol), 20 mL of 1,2-dichlorobenzene, 5 mL of glacial acetic acid, 5 drops of concentrated H<sub>2</sub>SO<sub>4</sub> sequentially. A reflux condenser was installed, and the mixture was heated to 120 °C for 6 h. The hot solution was poured into 100 mL of methanol, and an additional 10 mL of acidified methanol (concentrated HCl/MeOH, 1/10, v/v) was added to precipitate the copolymer. The precipitated copolymer was filtered, washed with methanol, dried under vacuum at 60 °C to a constant weight, and further characterized by <sup>1</sup>H NMR, confirming the complete conversion of hydroxyl to acetate groups.

## 5. Supplementary Notes

### 1) NMR Assignments of Poly(E-co-HAA) and Comonomer Content Calculation

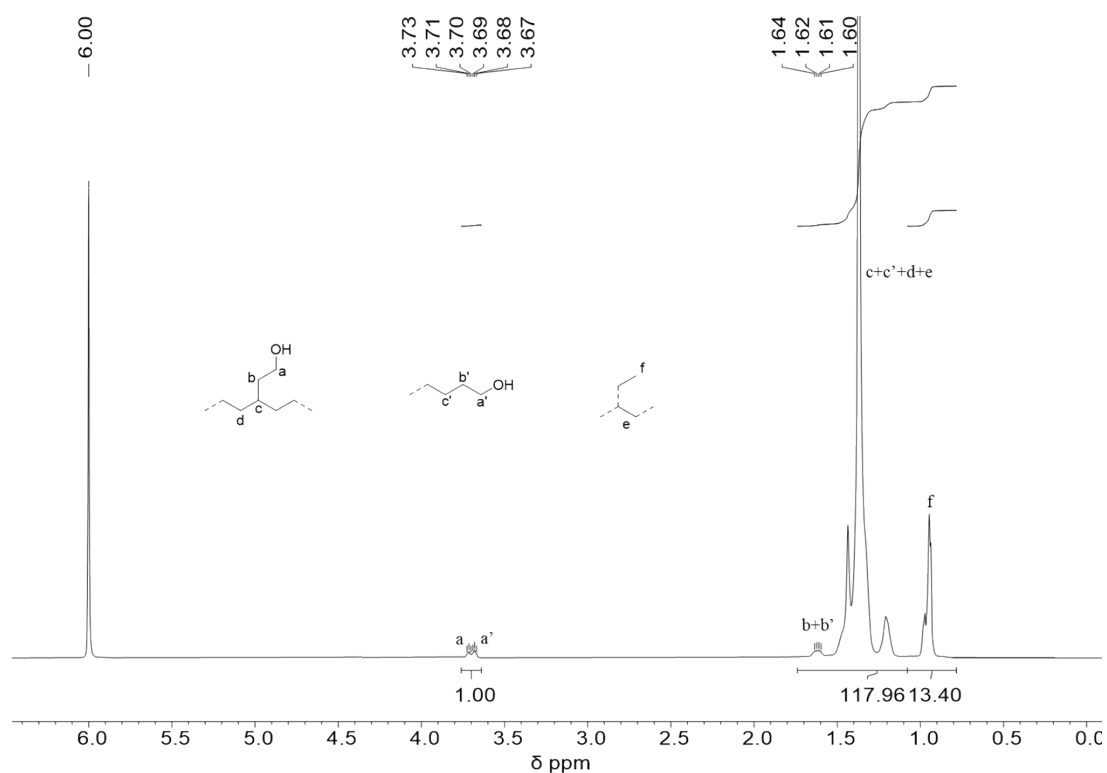

**Figure S7.**  $^1\text{H}$  NMR spectrum (600 MHz) of poly(E-co-HAA) (Entry 8, Table 2) in  $1,1,2,2$ -tetrachloroethane- $d_2$  at  $120^\circ\text{C}$ .

The comonomer content was calculated from quantitative  $^1\text{H}$  NMR spectrum analysis. The mole ratios of HAA and ethylene in the copolymer are  $x$  and  $1-x$ , respectively. The integration

$I_{b+b'+c+c'+d+e+f}$  is set as  $n$ , and the integration  $I_{a+a'}$  is set as 1.

$$\frac{2x}{5x + 4(1-x)} = \frac{1}{n}$$

$$x = \frac{4}{2n-1} \times 100\%$$

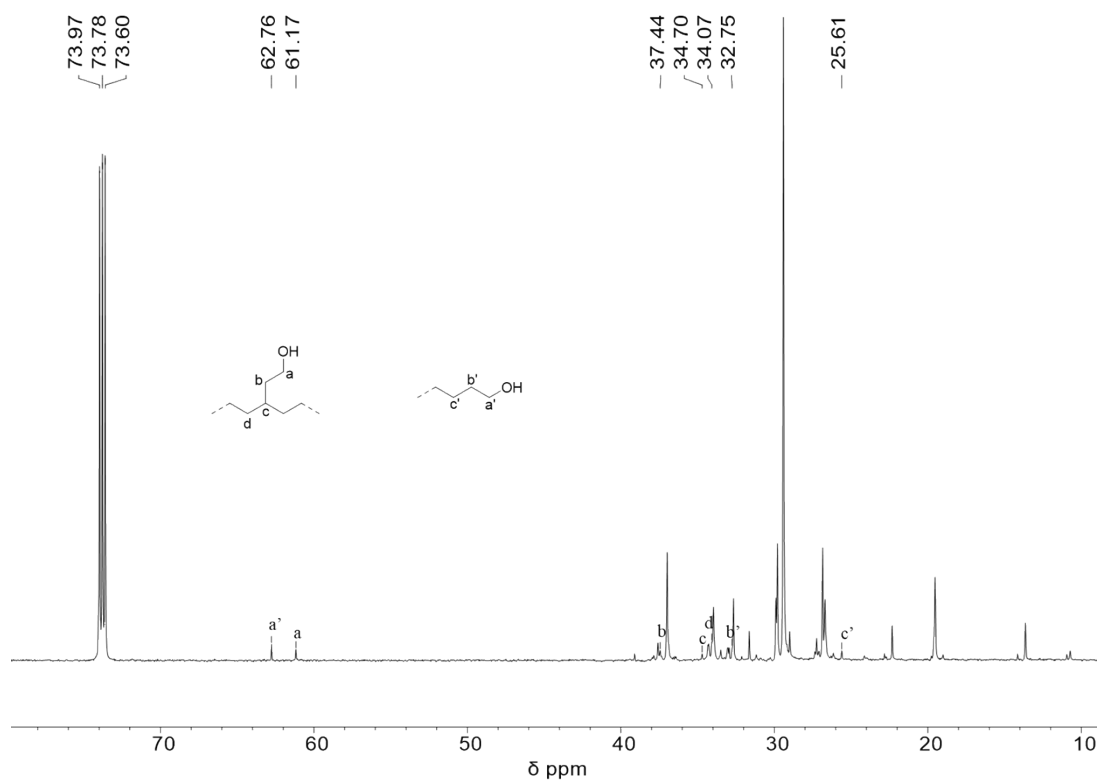

**Figure S8.**  $^{13}\text{C}$  NMR spectrum (150 MHz) of poly(E-co-HAA) (Entry 8, Table 2) in 1,1,2,2-tetrachloroethane- $d_2$  at 120 °C.

The signals of  $^1\text{H}$  and  $^{13}\text{C}$  NMR are assigned according to our previous work [3].

## 2) NMR Assignments of Poly(E-co-PA) and Comonomer Content Calculation

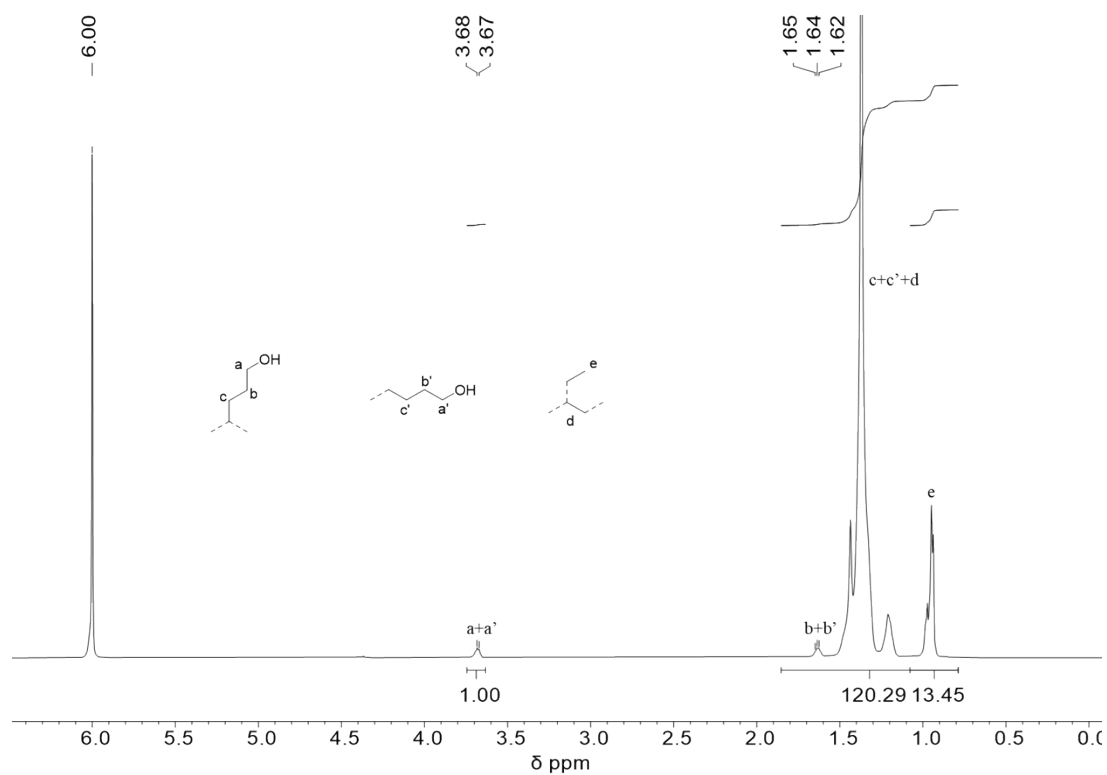

**Figure S9.**  $^1\text{H}$  NMR spectrum (600 MHz) of poly(E-co-PA) (Entry 12, Table 2) in 1,1,2,2-tetrachloroethane- $d_2$  at 120  $^\circ\text{C}$ .

The comonomer content was calculated from quantitative  $^1\text{H}$  NMR spectrum analysis. The mole ratios of PA and ethylene in the copolymer are  $x$  and  $1-x$ , respectively. The integration  $I_{b+b'+c+c'+d+e}$  is set as  $n$ , and the integration  $I_{a+a'}$  is set as 1.

$$\frac{2x}{7x + 4(1-x)} = \frac{1}{n}$$

$$x = \frac{4}{2n-3} \times 100\%$$

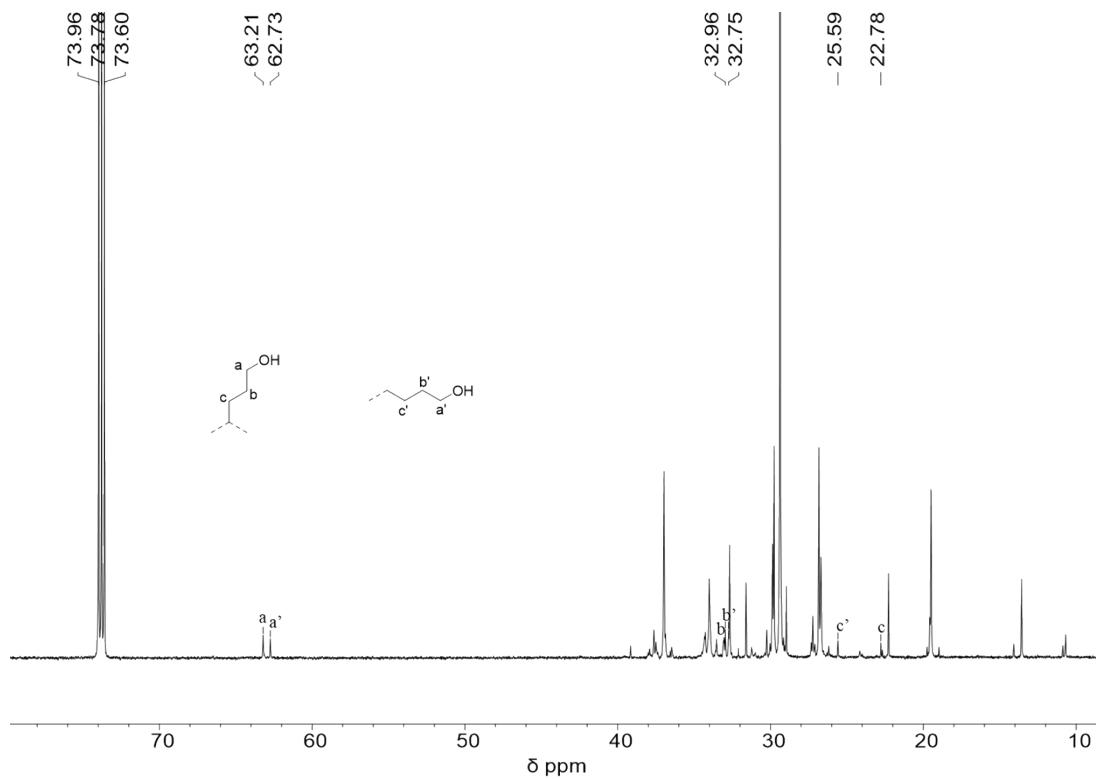

**Figure S10.**  $^{13}\text{C}$  NMR spectrum (150 MHz) of poly(E-co-PA) (Entry 12, Table 2) in 1,1,2,2-tetrachloroethane- $d_2$  at 120 °C.

The signals of  $^1\text{H}$  and  $^{13}\text{C}$  NMR are assigned according to our previous work [3].

### 3) NMR Assignments of Poly(E-co-DA) and Comonomer Content Calculation

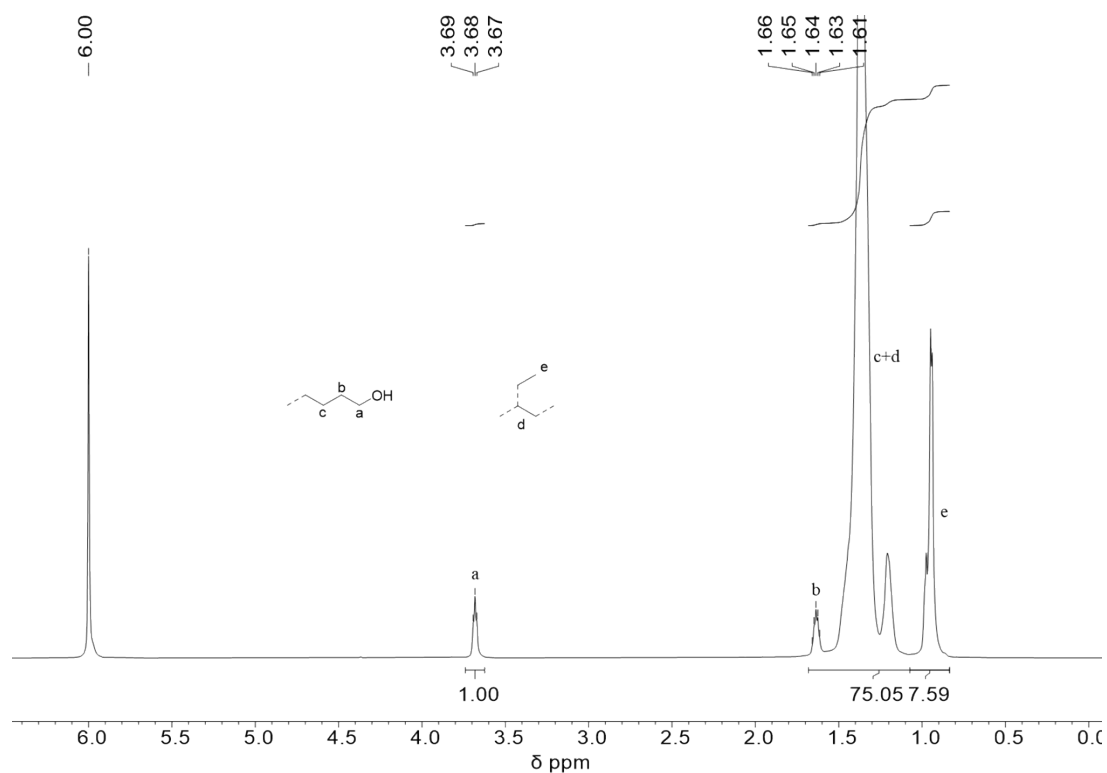

**Figure S11.**  $^1\text{H}$  NMR spectrum (600 MHz) of poly(E-co-DA) (Entry 16, Table 2) in 1,1,2,2-tetrachloroethane- $d_2$  at 120 °C.

The comonomer content was calculated from quantitative  $^1\text{H}$  NMR spectrum analysis. The mole ratios of DA and ethylene in the copolymer are  $x$  and  $1-x$ , respectively. The integration  $I_{b+c+d+e}$  is set as  $n$ , and the integration  $I_a$  is set as 1.

$$\frac{2x}{17x + 4(1-x)} = \frac{1}{n}$$

$$x = \frac{4}{2n - 13} \times 100\%$$

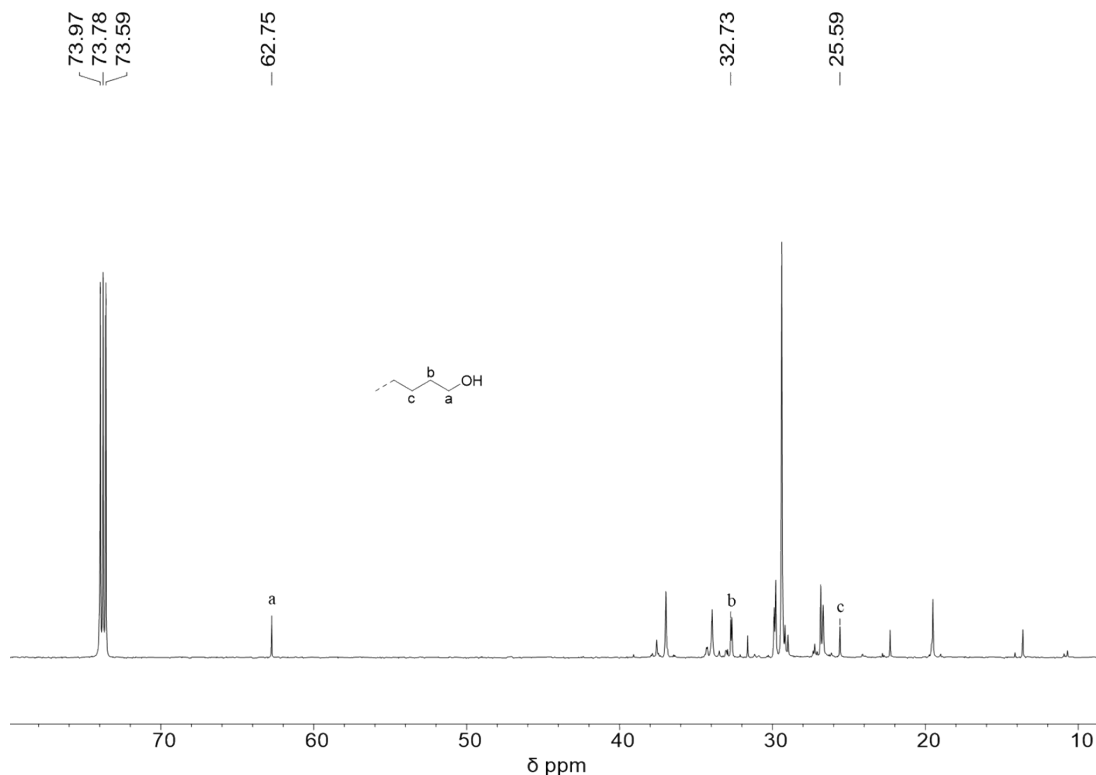

**Figure S12.**  $^{13}\text{C}$  NMR spectrum (150 MHz) of poly(E-co-DA) (Entry 16, Table 2) in 1,1,2,2-tetrachloroethane- $d_2$  at 120 °C.

The signals of  $^1\text{H}$  and  $^{13}\text{C}$  NMR are assigned according to our previous work [3].

#### 4) Microstructure Analysis of Poly(E-co-A-ol) and Comonomer Content Calculation

According to quantitative  $^1\text{H}$ ,  $^{13}\text{C}$  and 2D NMR (Figures S24-S29), as well as literature [3-6], the resulting poly(E-co-A-ol) exhibits microstructures as shown in the following scheme. Olefinic groups [5, 7, 8] and aromatic groups [9-12] were also detected in  $^1\text{H}$  NMR, which were assigned according to literature.

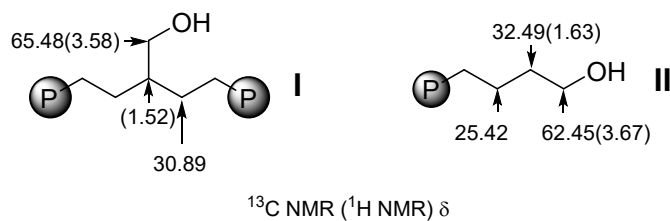

**Scheme S1.** Microstructure of Poly(E-co-A-ol)



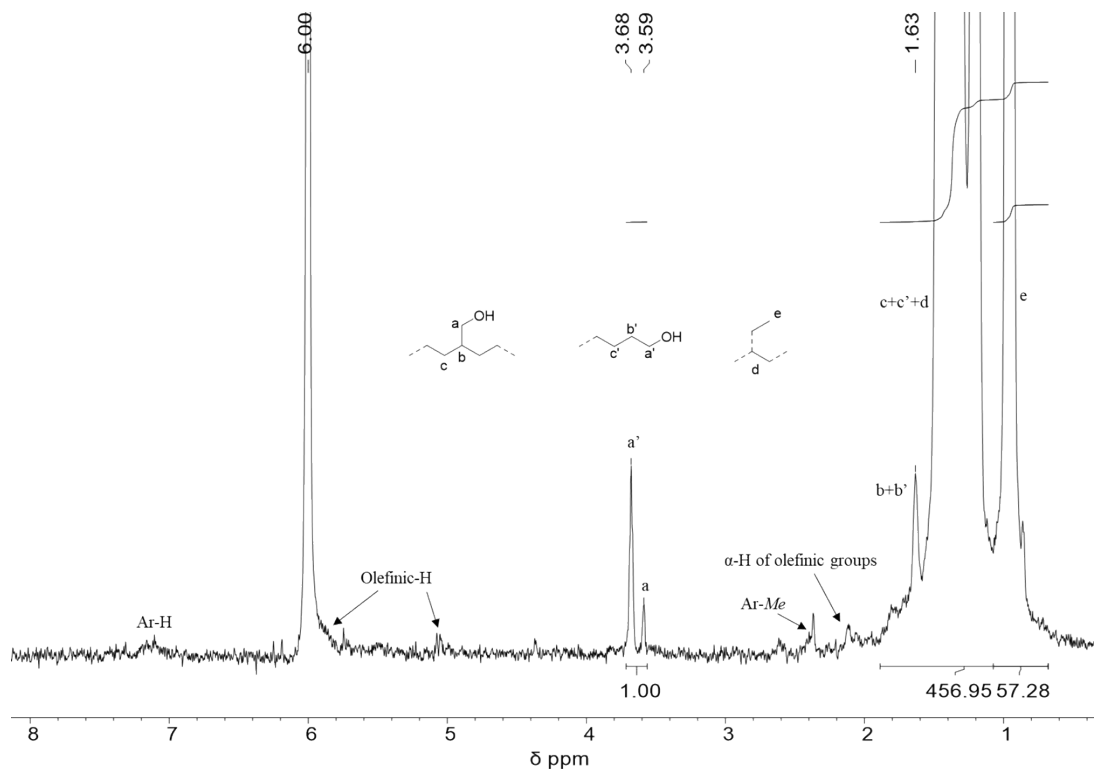

**Figure S13.** <sup>1</sup>H NMR spectrum (600 MHz) of poly(E-co-A-ol) (Entry 3, Table 2) in 1,1,2,2-tetrachloroethane-*d*<sub>2</sub> at 120 °C.

The comonomer content was calculated from quantitative <sup>1</sup>H NMR spectrum analysis. The mole ratios of A-ol and ethylene in the copolymer are *x* and 1-*x*, respectively. The integration  $I_{b+b'+c+c'+d+e}$  is set as *n*, and the integration  $I_{a+a'}$  is set as 1. Note that the olefinic and aromatic groups probably from β-OAl elimination were not taken into quantitative calculation.

$$\frac{2x}{3x + 4(1 - x)} = \frac{1}{n}$$

$$x = \frac{4}{2n + 1} \times 100\%$$

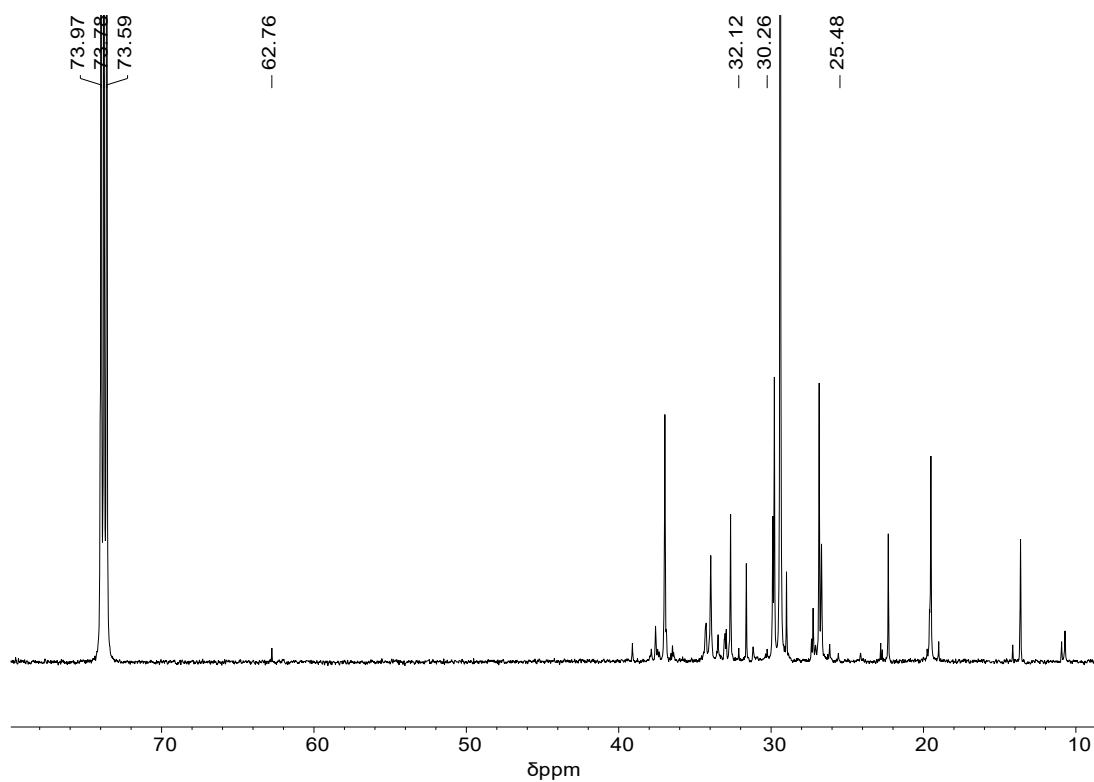

**Figure S14.**  $^{13}\text{C}$  NMR spectrum (150 MHz) of poly(E-co-A-ol) (Entry 3, Table 2) in 1,1,2,2-tetrachloroethane- $d_2$  at 120 °C.

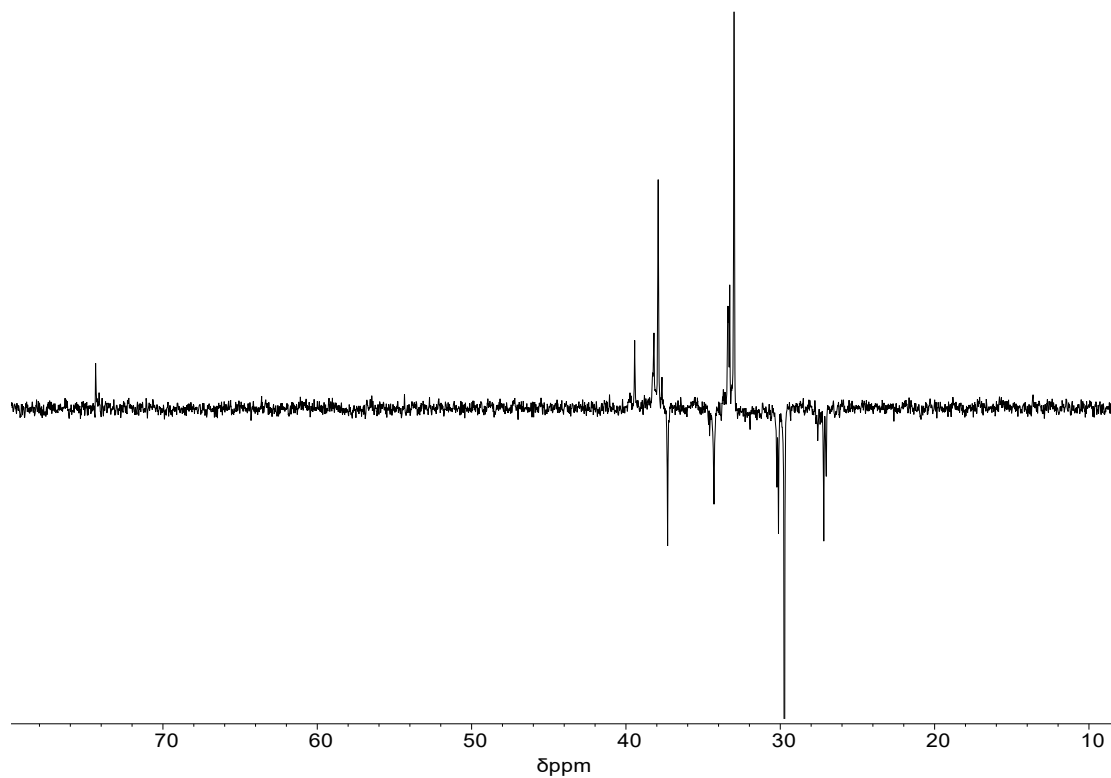

**Figure S15.** DEPT 135 spectrum of poly(E-co-A-ol) (Entry 3, Table 2) in 1,1,2,2-tetrachloroethane- $d_2$  at 120 °C.

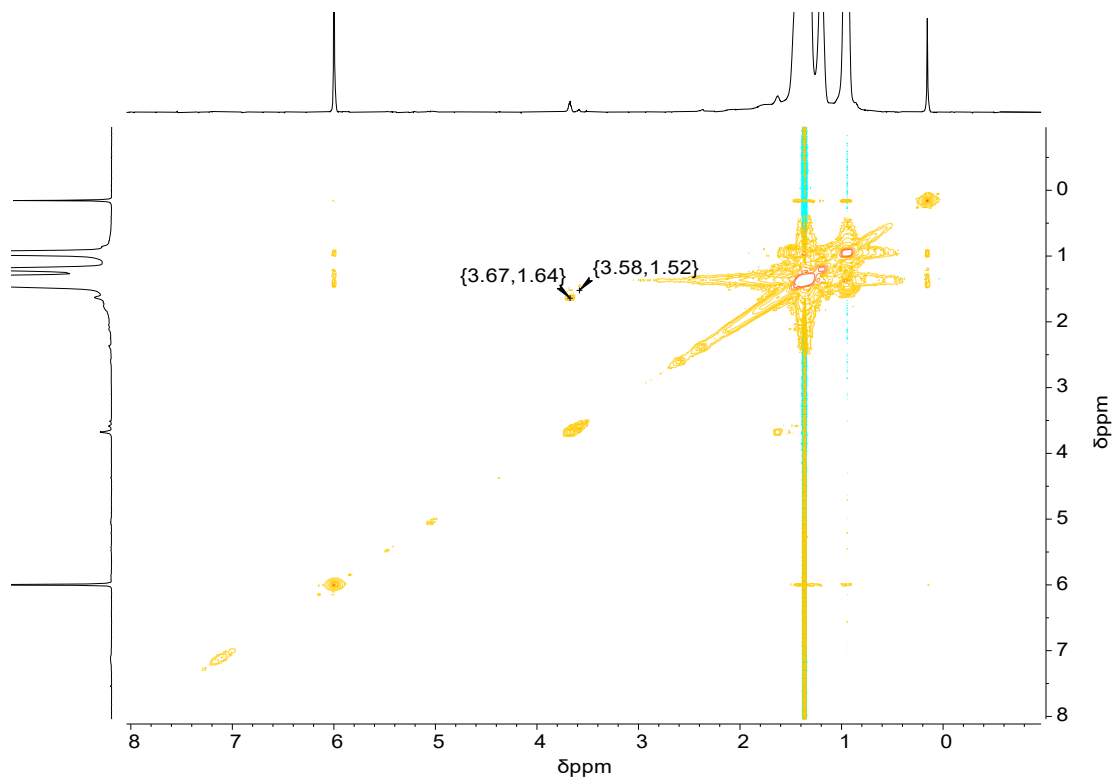

**Figure S16.** COSY spectrum of poly(E-co-A-ol) (Entry 3, Table 2) in 1,1,2,2-tetrachloroethane- $d_2$  at 120 °C.

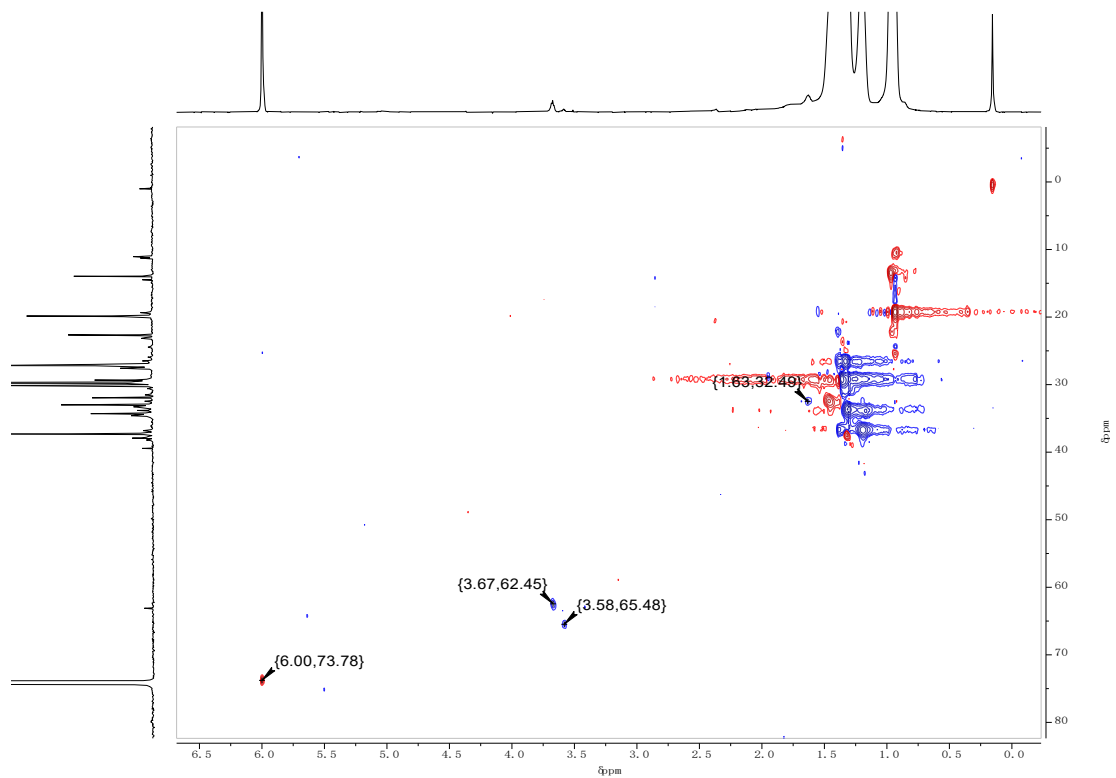

**Figure S17.** HSQC spectrum of poly(E-co-A-ol) (Entry 3, Table 2) in 1,1,2,2-tetrachloroethane- $d_2$  at 120 °C.

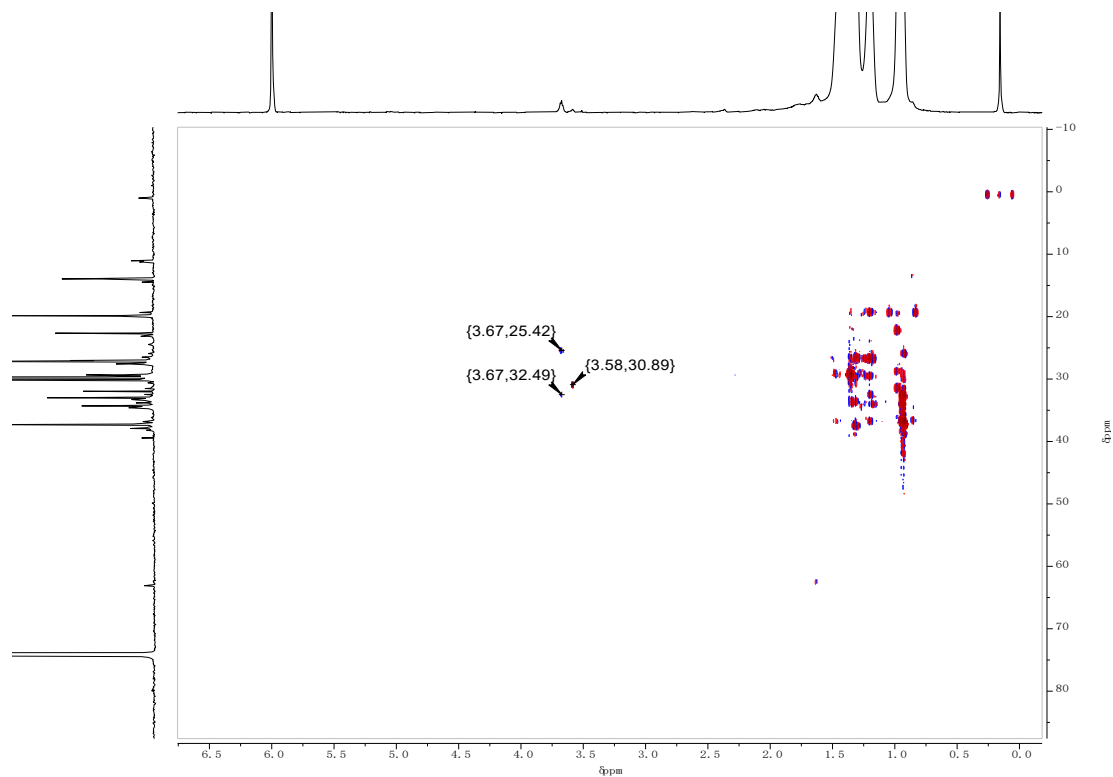

**Figure S18.** HMBC spectrum of poly(E-co-A-ol) (Entry 3, Table 2) in 1,1,2,2-tetrachloroethane- $d_2$  at 120 °C.

## 5) NMR Assignments of Poly(E-co-AAc) and Double Bond Content Calculation

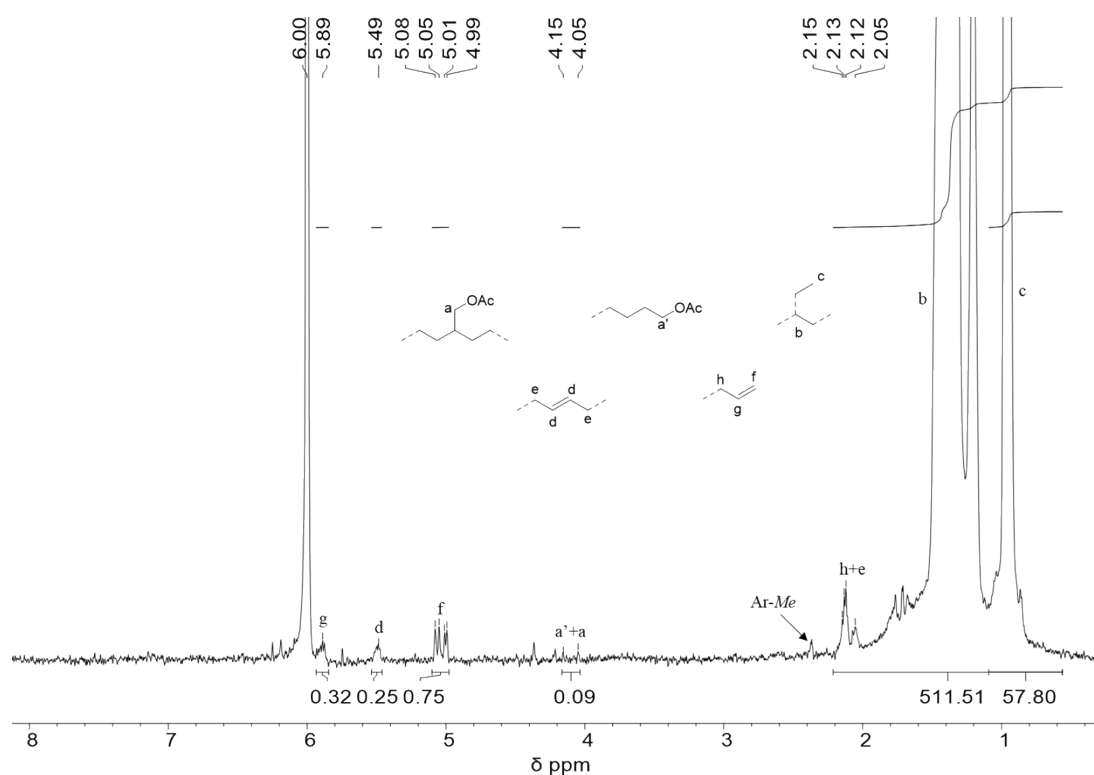

**Figure S19.**  $^1\text{H}$  NMR spectrum (600 MHz) of poly(E-co-AAc) (Entry 2, Table 4) (little -OAc content but double bond detected) in 1,1,2,2-tetrachloroethane- $d_2$  at 120 °C.

Negligible peaks assigned to the -OAc group were observed in the  $^1\text{H}$  NMR spectra of the poly(E-co-AAc) samples. The double bond content was calculated from quantitative  $^1\text{H}$  NMR spectrum analysis. The mole ratios of double bond and ethylene in the copolymer are  $x$  and  $1-x$ , respectively. The integration  $I_{b+c+e+h}$  is set as  $n$ ; the integration  $I_{d+f}$  is set as 1, and the integration  $I_f$  is set as  $m$ .

$$\frac{2x}{5x + 4(1-x)} = \frac{1}{n + 1 + m/2}$$

$$x = \frac{4}{2n + m + 1} \times 100\%$$

Note that the aromatic groups were also detected in  $^1\text{H}$  NMR but were not taken into quantitative calculation. The double bond content calculated based on the equation above in Table 4 ranged from 0.2~0.5 mol%, which could be expressed as trace content, so their quantitative analysis was not pursued either.

## 6) Branching Analysis from $^1\text{H}$ NMR

The amount of methyl groups ( $N_{\text{Me groups}}/1000\text{C}$ ) based on  $^1\text{H}$  NMR spectra were analyzed according to literature [7, 8].

$$N_{Me} \text{ groups}/1000C = 2 \times I_{Me} / (3 \times I_{tot}) \times 1000$$

## 6. Polymer Characterizations

### 1) NMR Spectra of Poly(E-co-HAA)

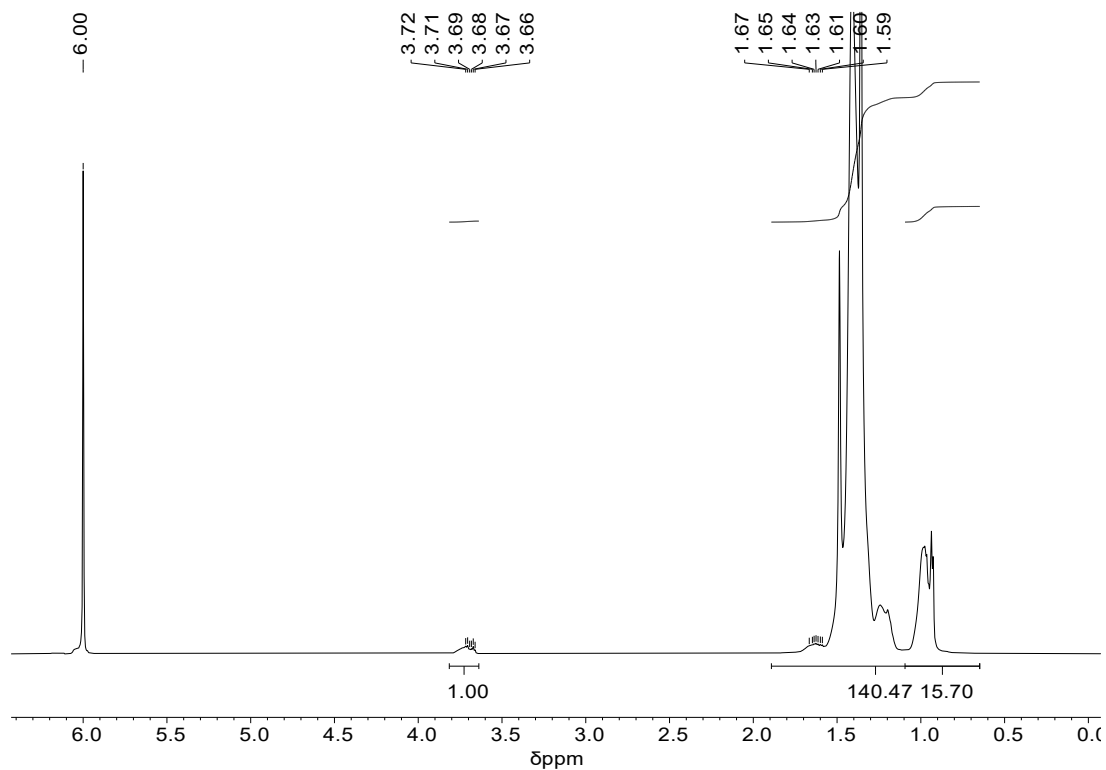

**Figure S20.** <sup>1</sup>H NMR spectrum (600 MHz) of poly(E-co-HAA) (Entry 2, Table 1) in 1,1,2,2-tetrachloroethane-*d*<sub>2</sub> at 120 °C.

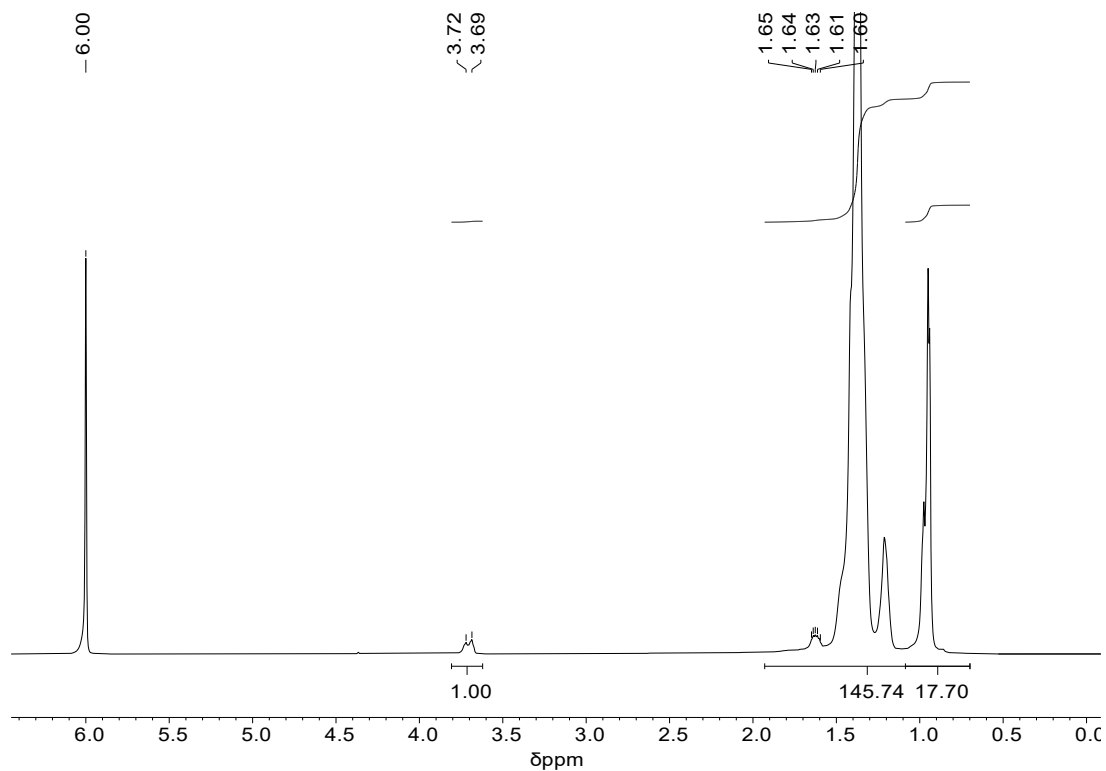

**Figure S21.** <sup>1</sup>H NMR spectrum (600 MHz) of poly(E-co-HAA) (Entry 3, Table 1) in 1,1,2,2-tetrachloroethane-*d*<sub>2</sub> at 120 °C.

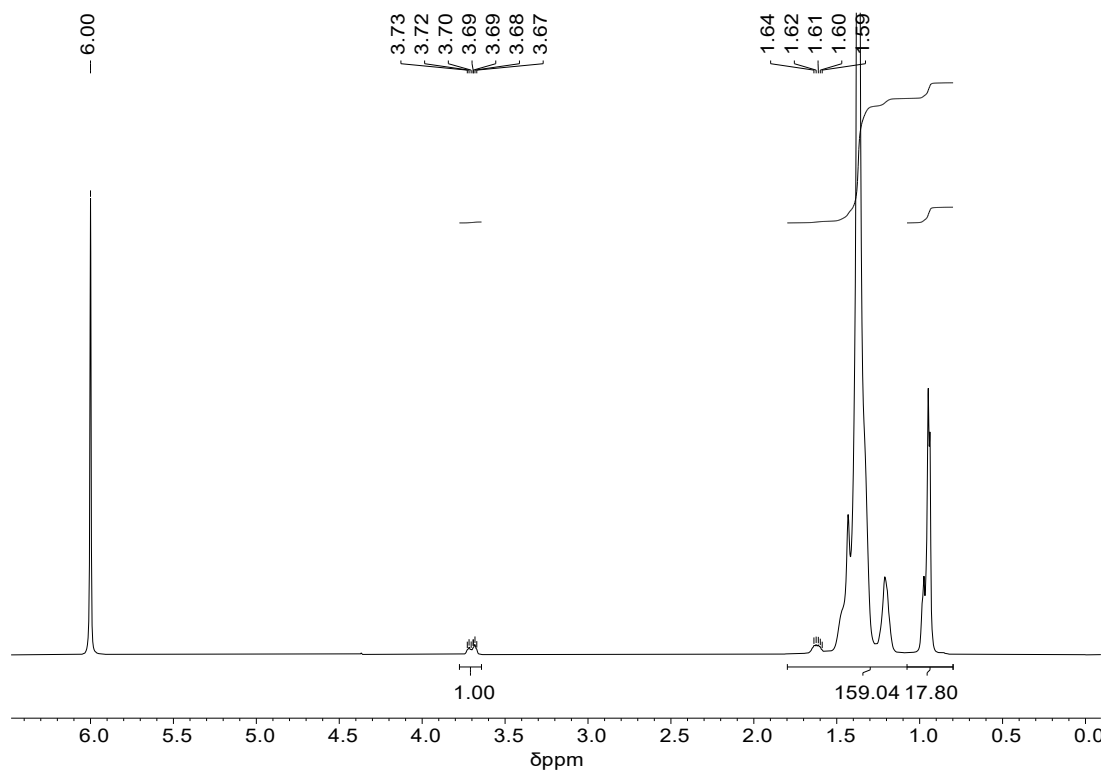

**Figure S22.** <sup>1</sup>H NMR spectrum (600 MHz) of poly(E-co-HAA) (Entry 4, Table 1 & Entry 6, Table 2) in 1,1,2,2-tetrachloroethane-*d*<sub>2</sub> at 120 °C.

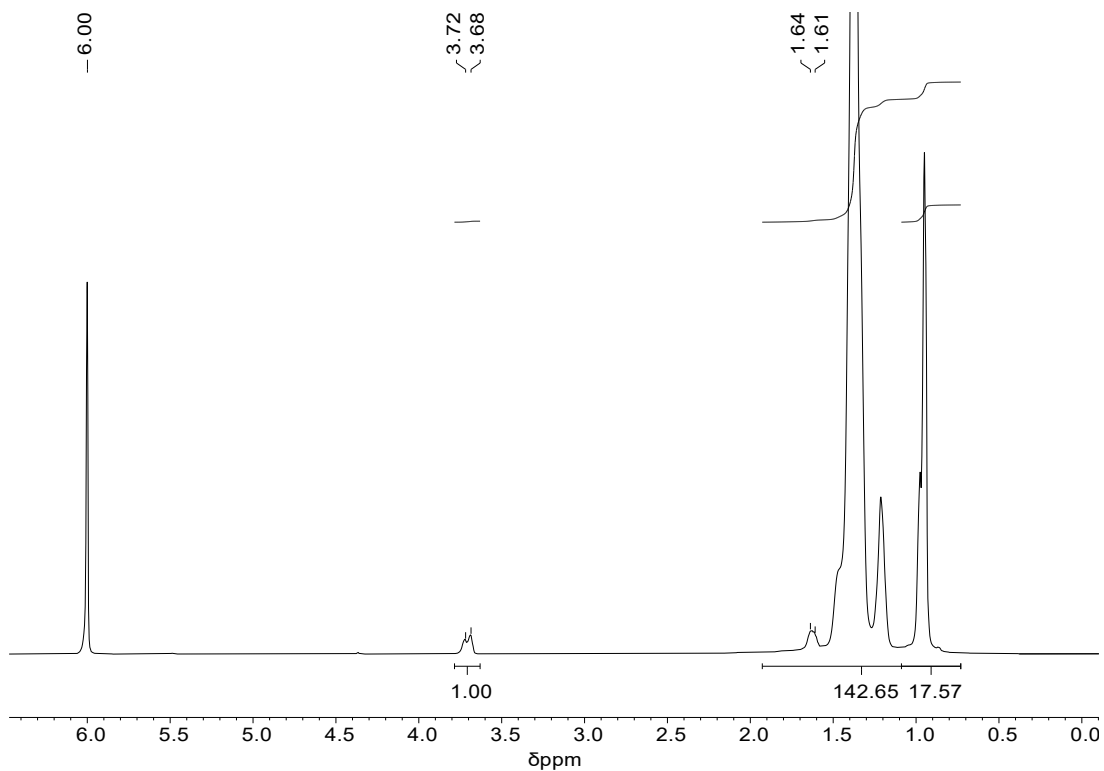

**Figure S23.**  $^1\text{H}$  NMR spectrum (600 MHz) of poly(E-co-HAA) (Entry 5, Table 1) in 1,1,2,2-tetrachloroethane- $d_2$  at 120 °C.

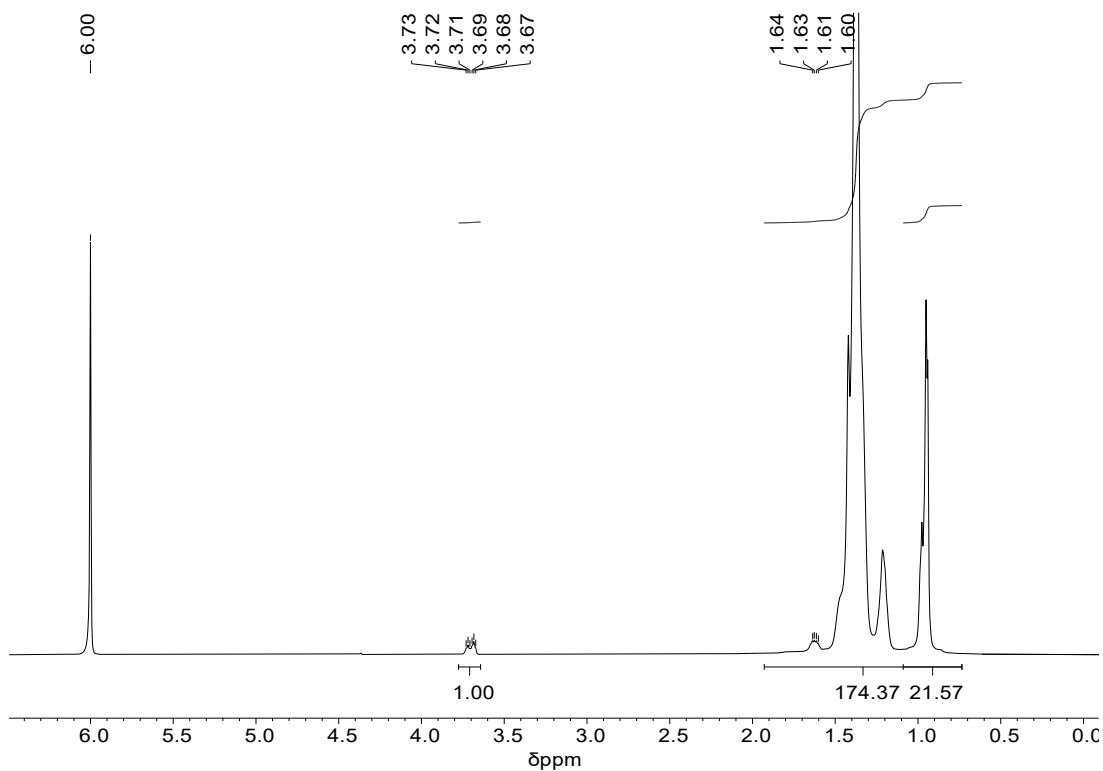

**Figure S24.**  $^1\text{H}$  NMR spectrum (600 MHz) of poly(E-co-HAA) (Entry 6, Table 1) in 1,1,2,2-tetrachloroethane- $d_2$  at 120 °C.



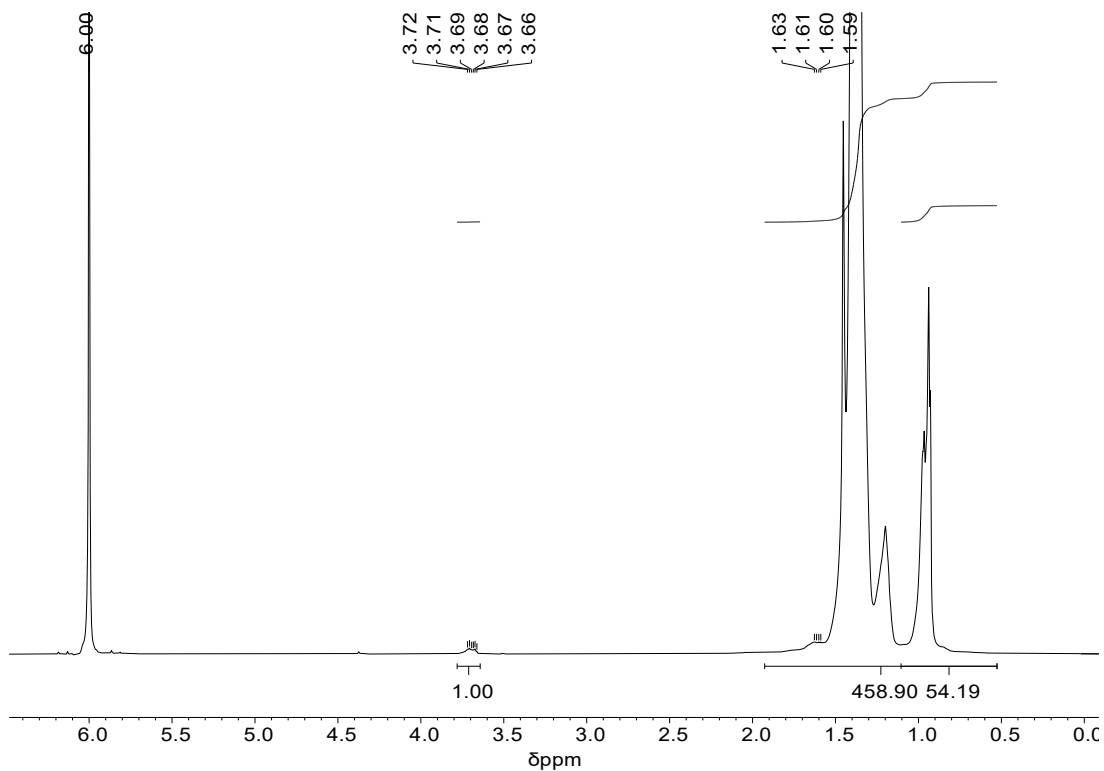

**Figure S25.**  $^1\text{H}$  NMR spectrum (600 MHz) of poly(E-co-HAA) (Entry 7, Table 1) in 1,1,2,2-tetrachloroethane- $d_2$  at 120  $^\circ\text{C}$ .

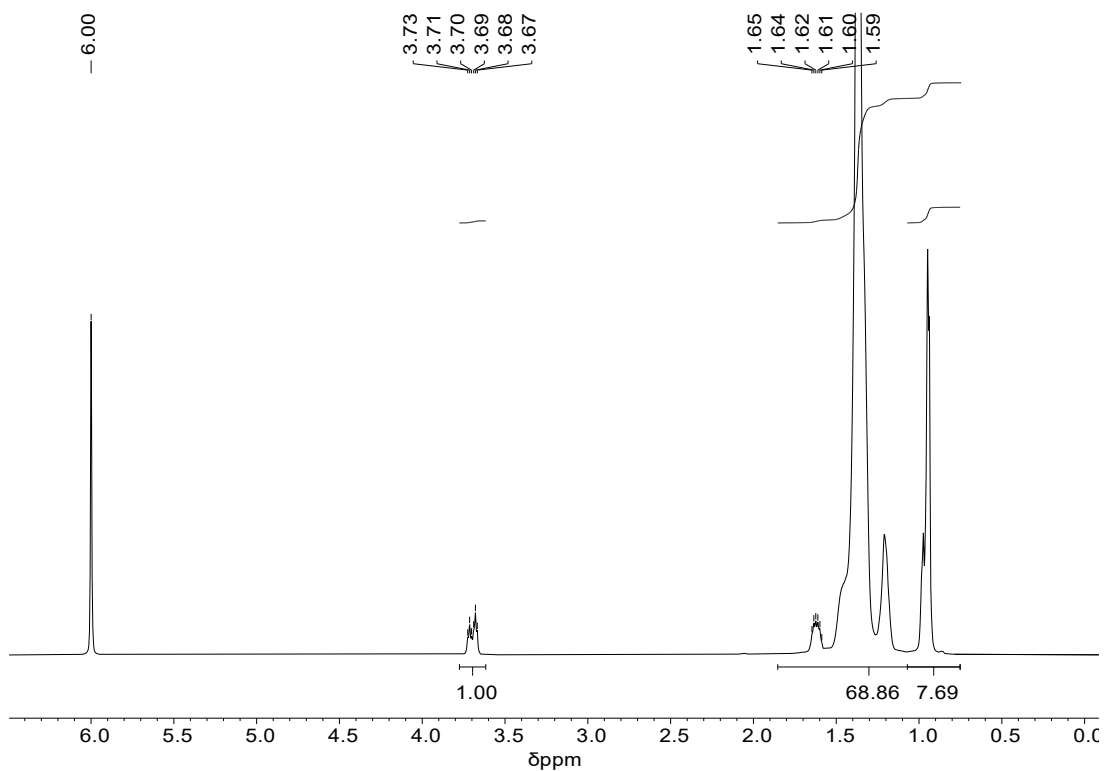

**Figure S26.**  $^1\text{H}$  NMR spectrum (600 MHz) of poly(E-co-HAA) (Entry 8, Table 1) in 1,1,2,2-tetrachloroethane- $d_2$  at 120  $^\circ\text{C}$ .

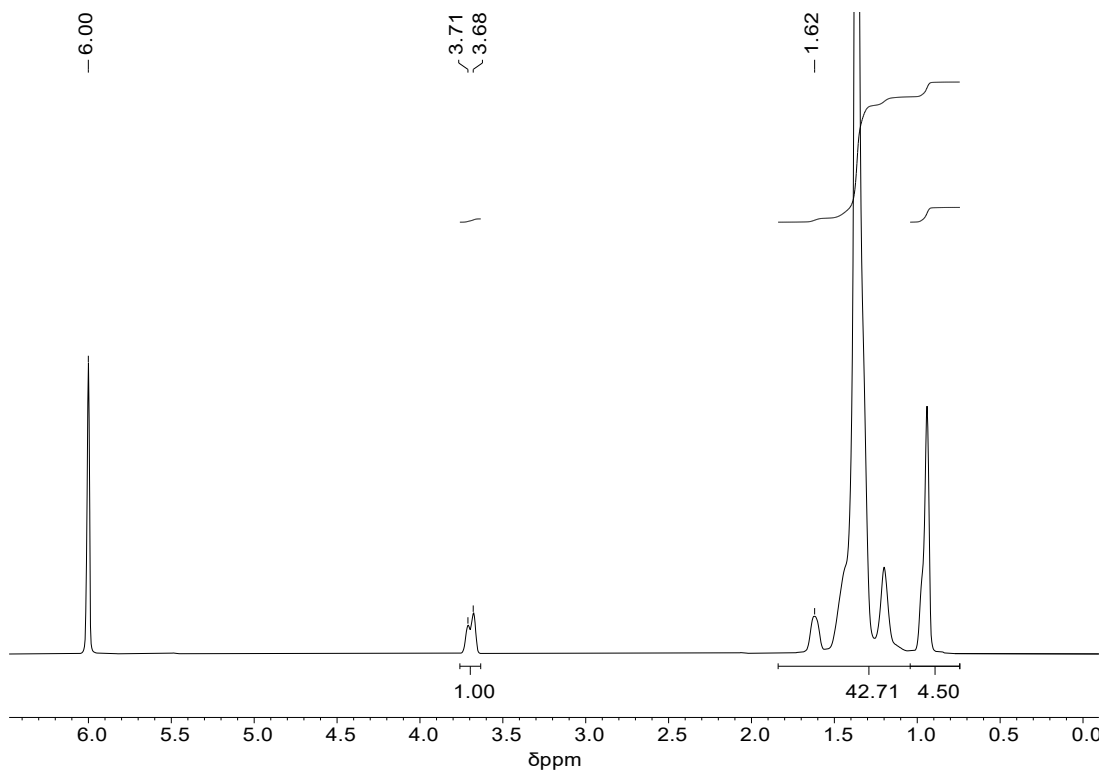

**Figure S27.**  $^1\text{H}$  NMR spectrum (600 MHz) of poly(E-co-HAA) (Entry 9, Table 1) in  $1,1,2,2$ -tetrachloroethane- $d_2$  at  $120\text{ }^\circ\text{C}$ .

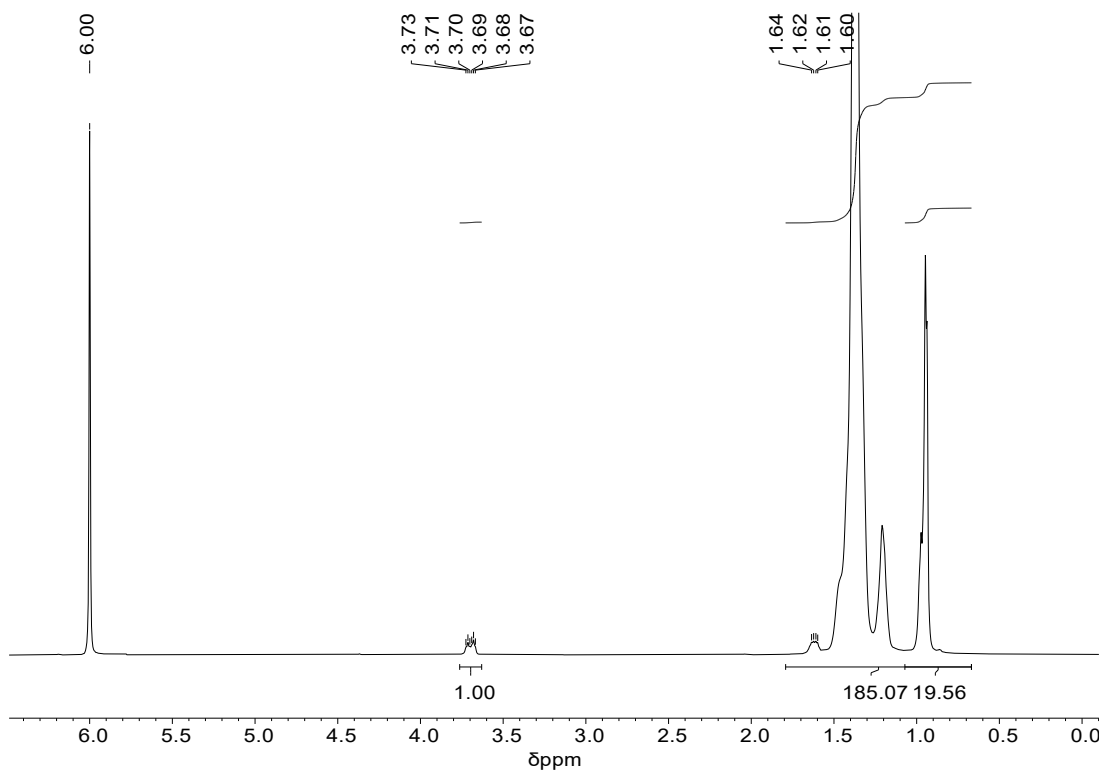

**Figure S28.**  $^1\text{H}$  NMR spectrum (600 MHz) of poly(E-co-HAA) (Entry 10, Table 1) in  $1,1,2,2$ -tetrachloroethane- $d_2$  at  $120\text{ }^\circ\text{C}$ .

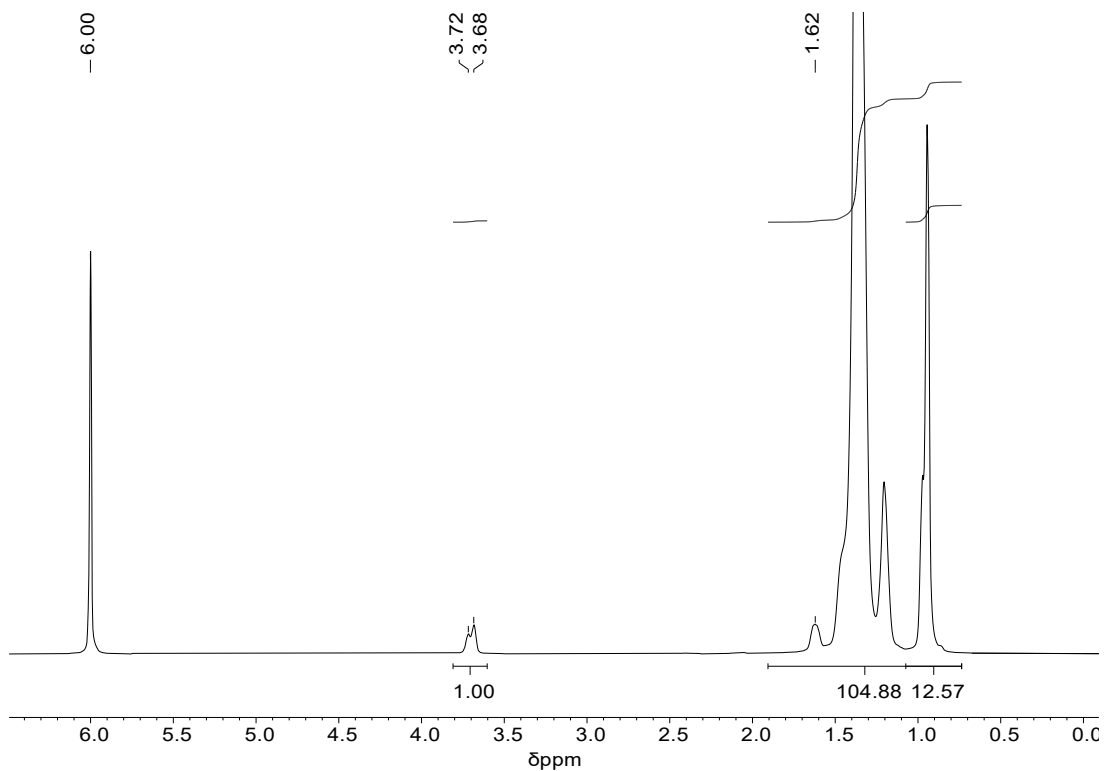

**Figure S29.**  $^1\text{H}$  NMR spectrum (600 MHz) of poly(E-co-HAA) (Entry 11, Table 1) in 1,1,2,2-tetrachloroethane- $d_2$  at 120 °C.

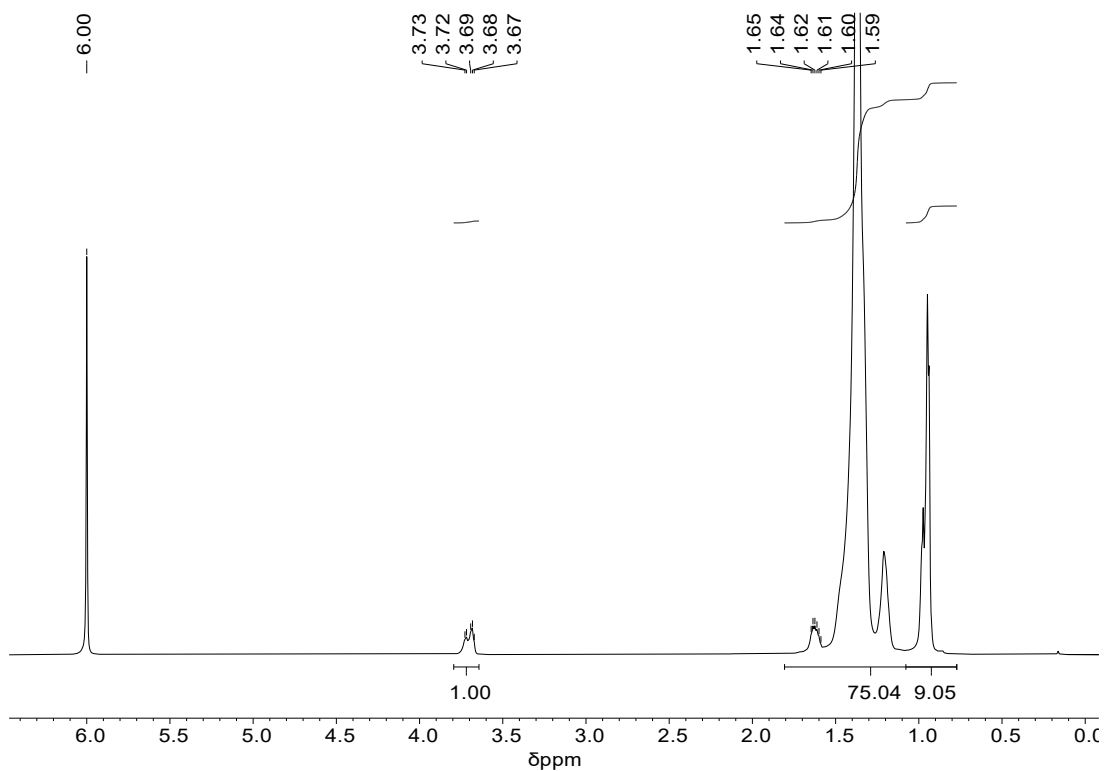

**Figure S30.**  $^1\text{H}$  NMR spectrum (600 MHz) of poly(E-co-HAA) (Entry 12, Table 1) in 1,1,2,2-tetrachloroethane- $d_2$  at 120 °C.

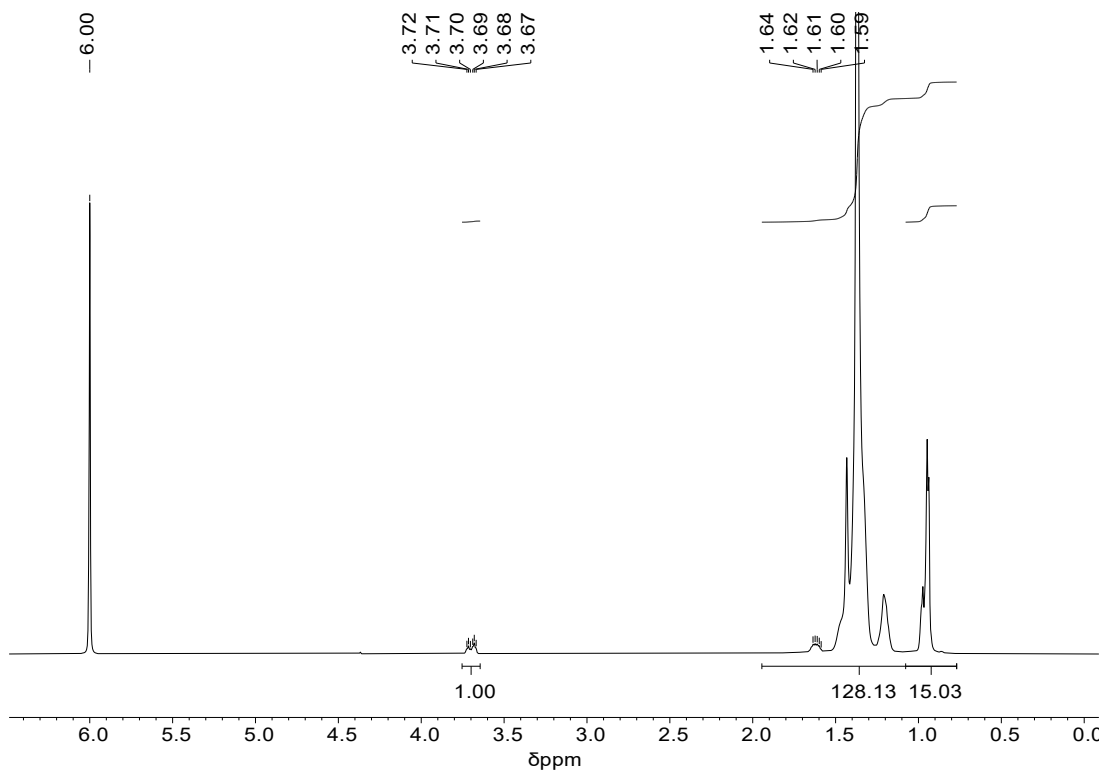

**Figure S31.**  $^1\text{H}$  NMR spectrum (600 MHz) of poly(E-co-HAA) (Entry 13, Table 1) in 1,1,2,2-tetrachloroethane- $d_2$  at 120 °C.

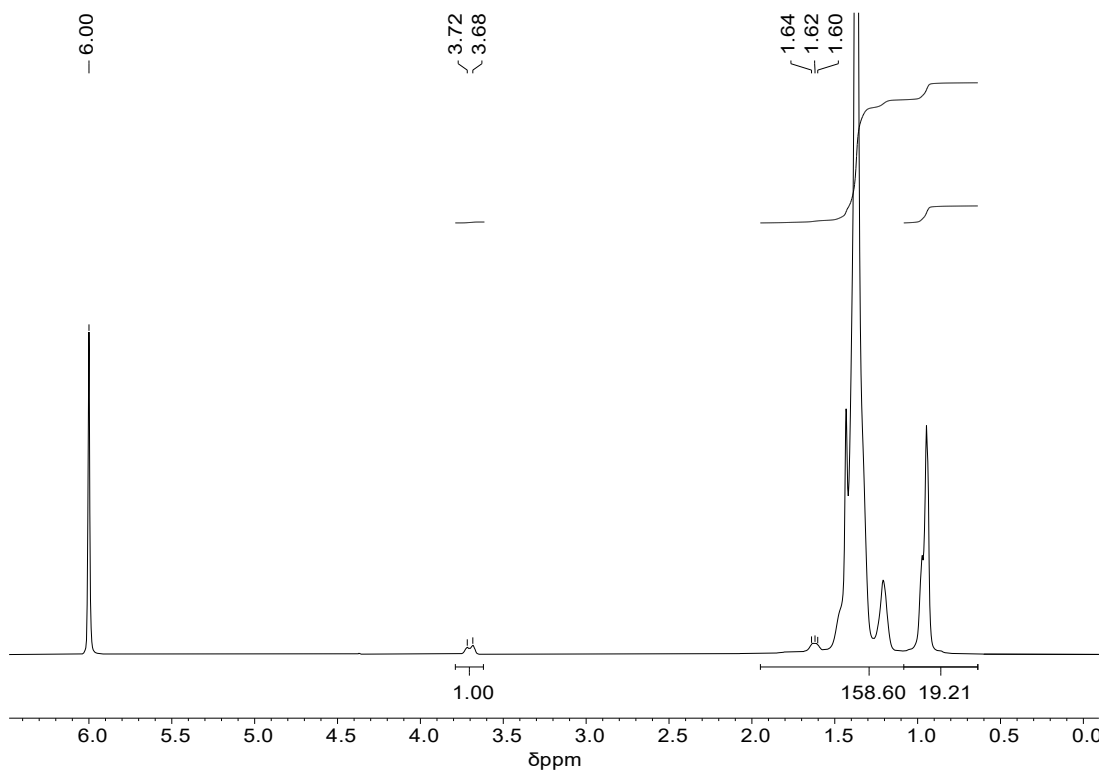

**Figure S32.**  $^1\text{H}$  NMR spectrum (600 MHz) of poly(E-co-HAA) (Entry 14, Table 1) in 1,1,2,2-tetrachloroethane- $d_2$  at 120 °C.

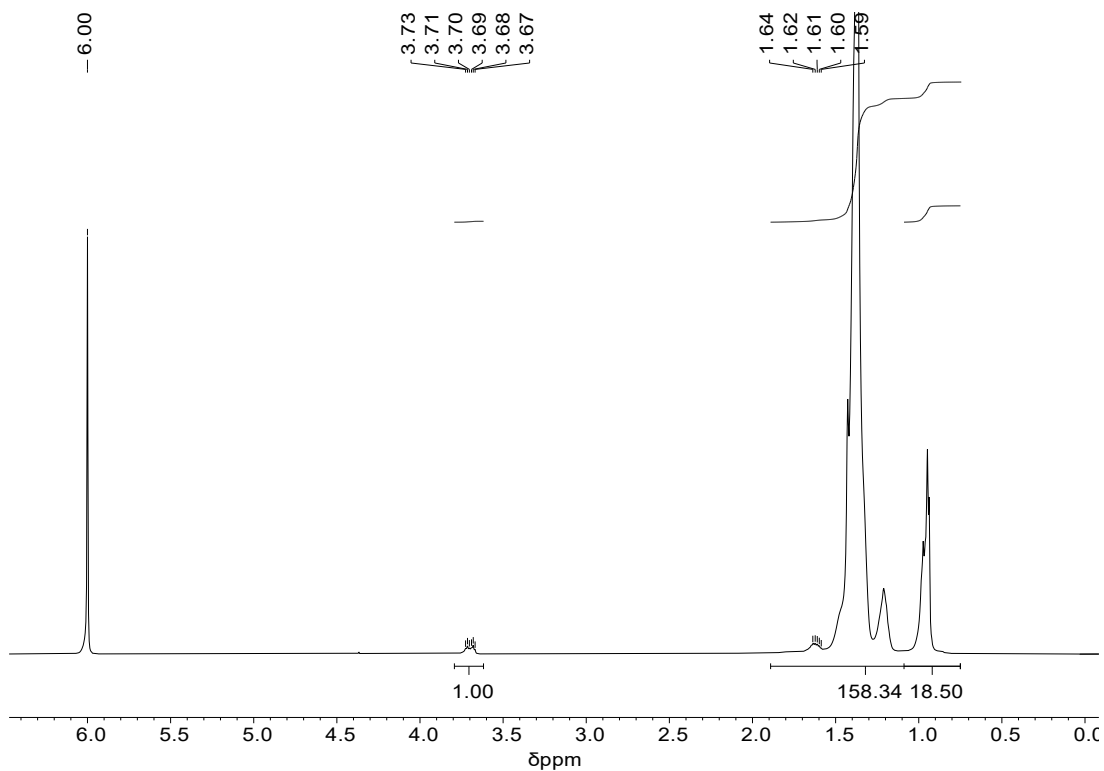

**Figure S33.**  $^1\text{H}$  NMR spectrum (600 MHz) of poly(E-co-HAA) (Entry 15, Table 1) in 1,1,2,2-tetrachloroethane- $d_2$  at 120 °C.

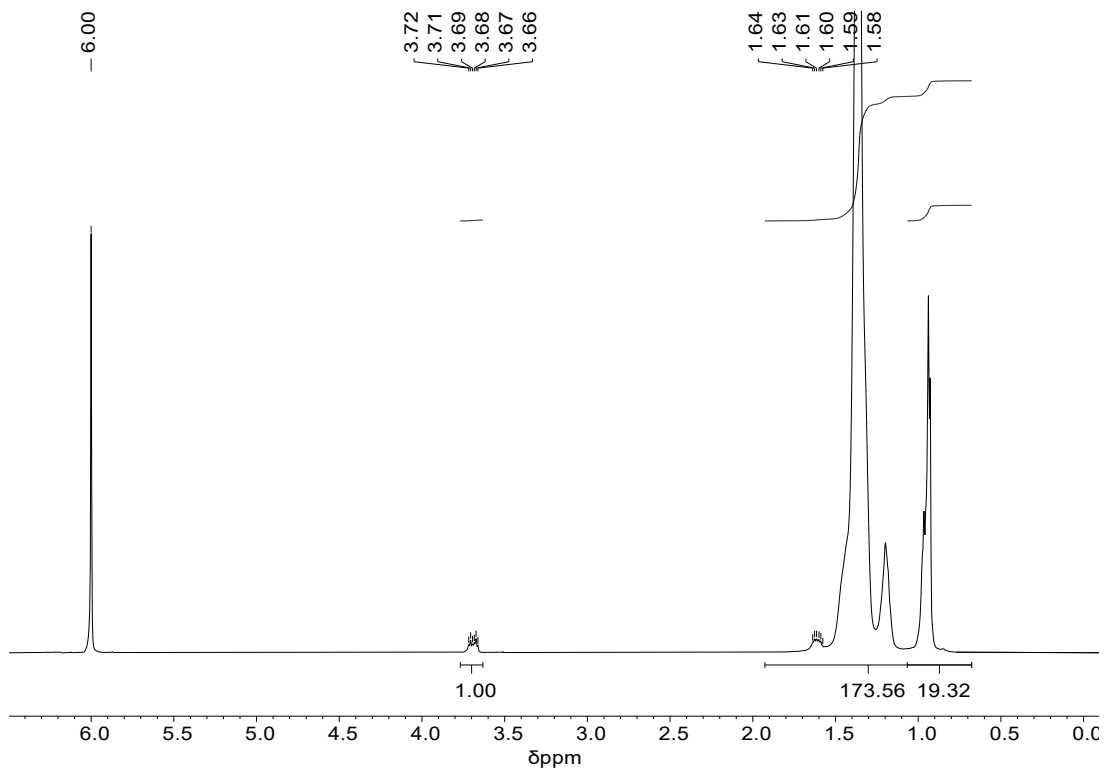

**Figure S34.**  $^1\text{H}$  NMR spectrum (600 MHz) of poly(E-co-HAA) (Entry 16, Table 1) in 1,1,2,2-tetrachloroethane- $d_2$  at 120 °C.

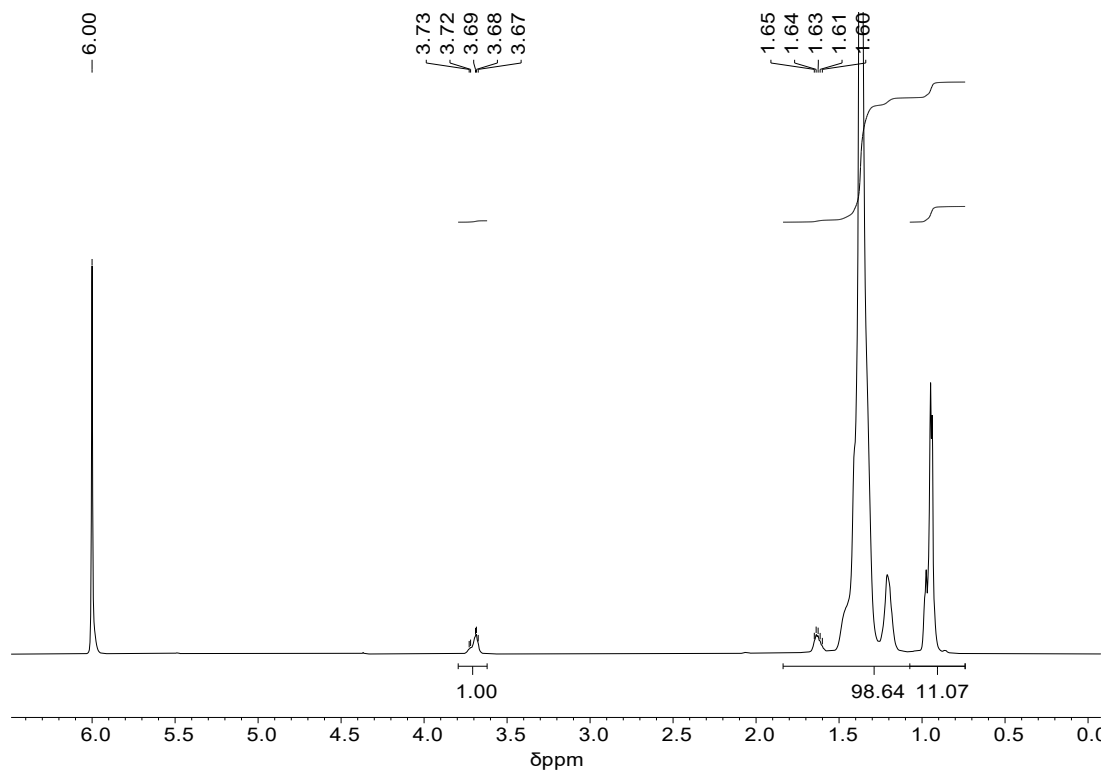

**Figure S35.**  $^1\text{H}$  NMR spectrum (600 MHz) of poly(E-co-HAA) (Entry 7, Table 2) in 1,1,2,2-tetrachloroethane- $d_2$  at 120 °C.

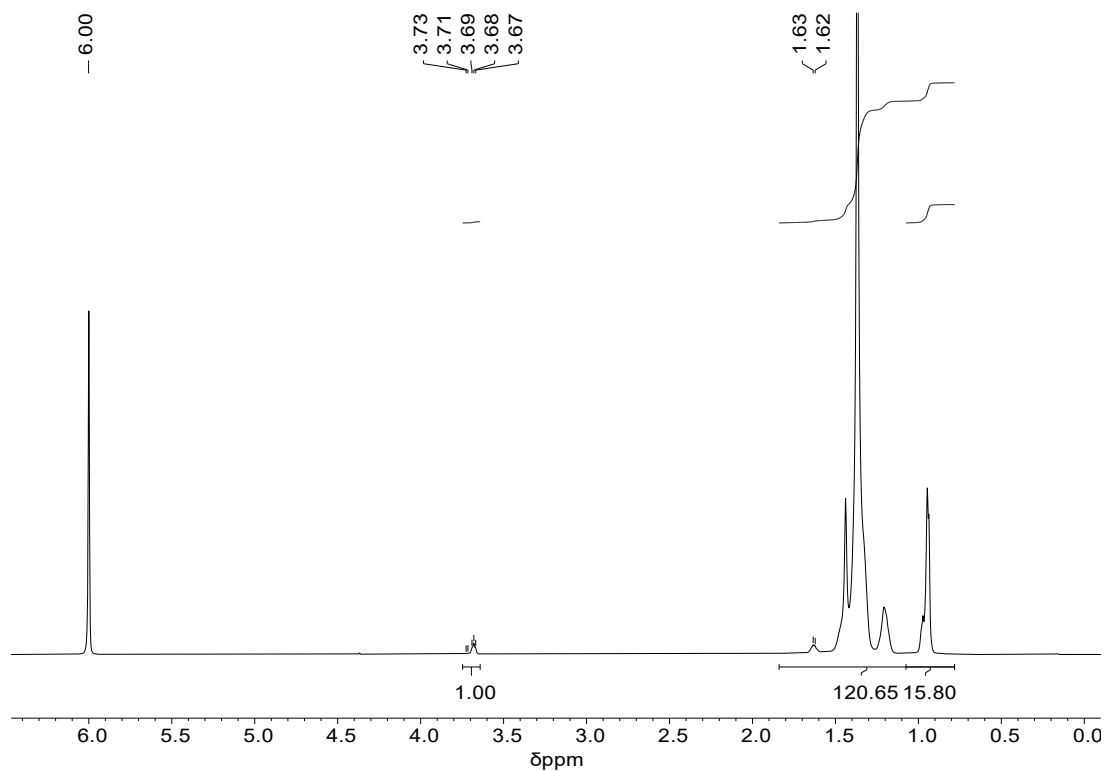

**Figure S36.**  $^1\text{H}$  NMR spectrum (600 MHz) of poly(E-co-HAA) (Entry 9, Table 2) in 1,1,2,2-tetrachloroethane- $d_2$  at 120 °C.

## 2) NMR Spectra of Poly(E-co-PA)

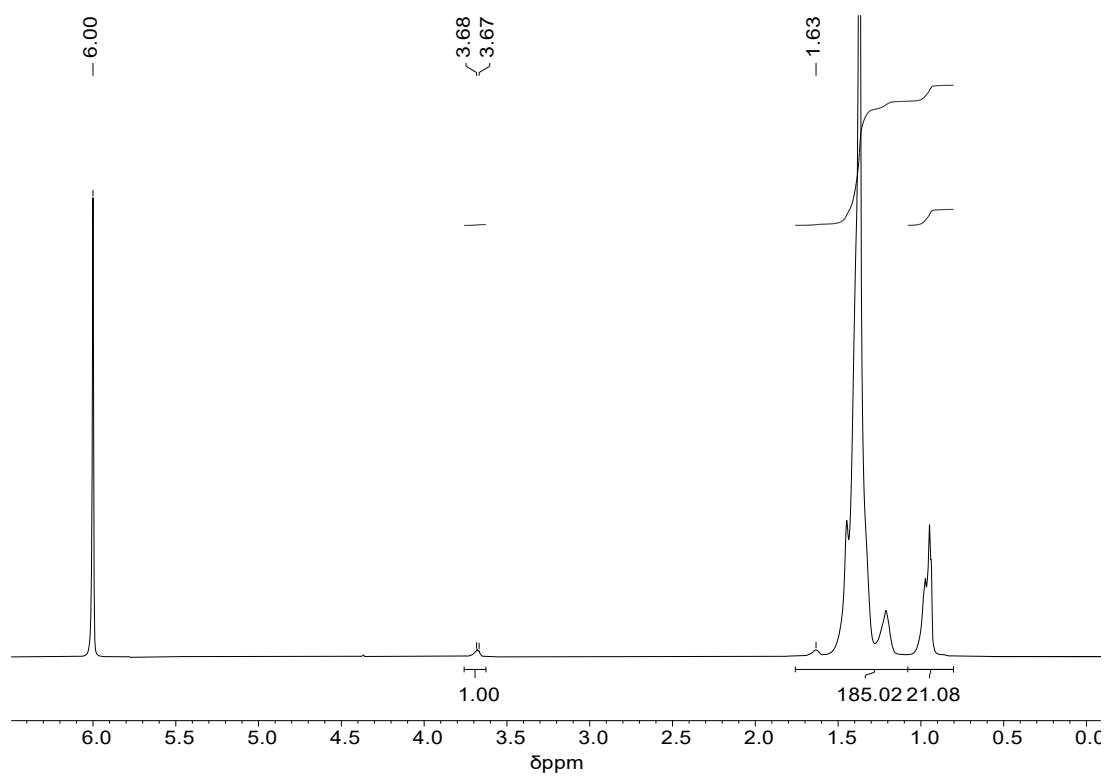

**Figure S37.**  $^1\text{H}$  NMR spectrum (600 MHz) of poly(E-co-PA) (Entry 10, Table 2) in  $1,1,2,2$ -tetrachloroethane- $d_2$  at  $120^\circ\text{C}$ .

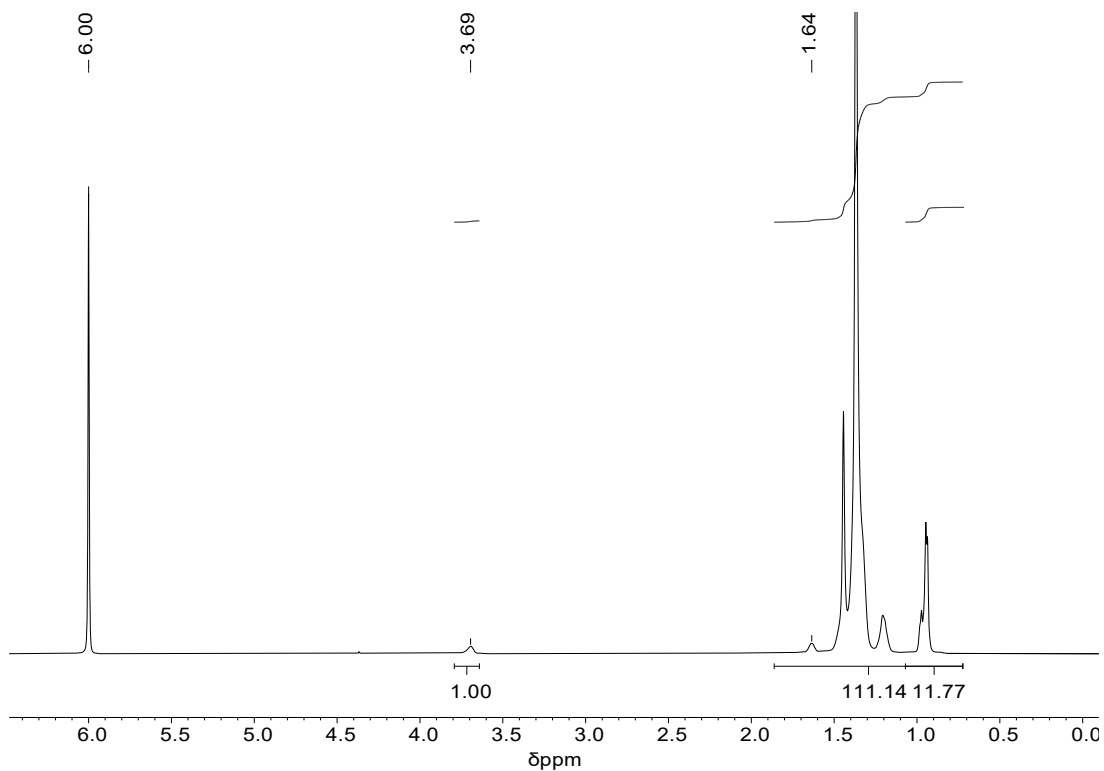

**Figure S38.**  $^1\text{H}$  NMR spectrum (600 MHz) of poly(E-co-PA) (Entry 11, Table 2) in 1,1,2,2-tetrachloroethane- $d_2$  at 120 °C.

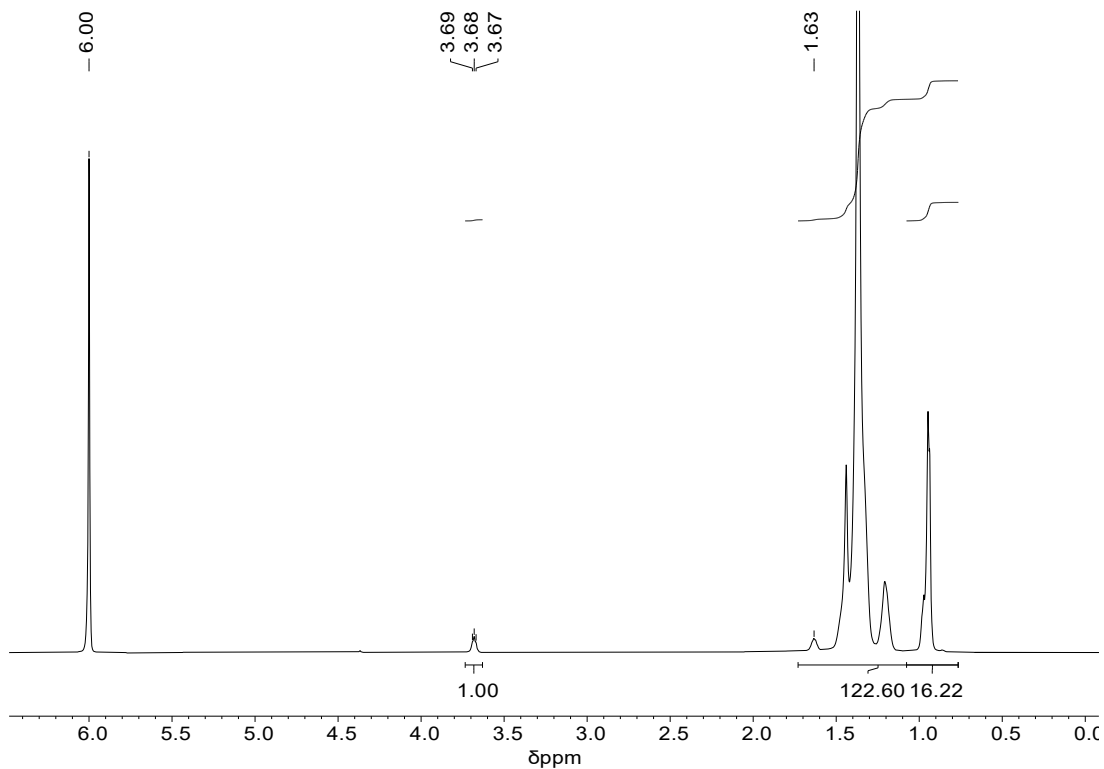

**Figure S39.**  $^1\text{H}$  NMR spectrum (600 MHz) of poly(E-co-PA) (Entry 13, Table 2) in 1,1,2,2-tetrachloroethane- $d_2$  at 120 °C.



### 3) NMR Spectra of Poly(E-co-DA)

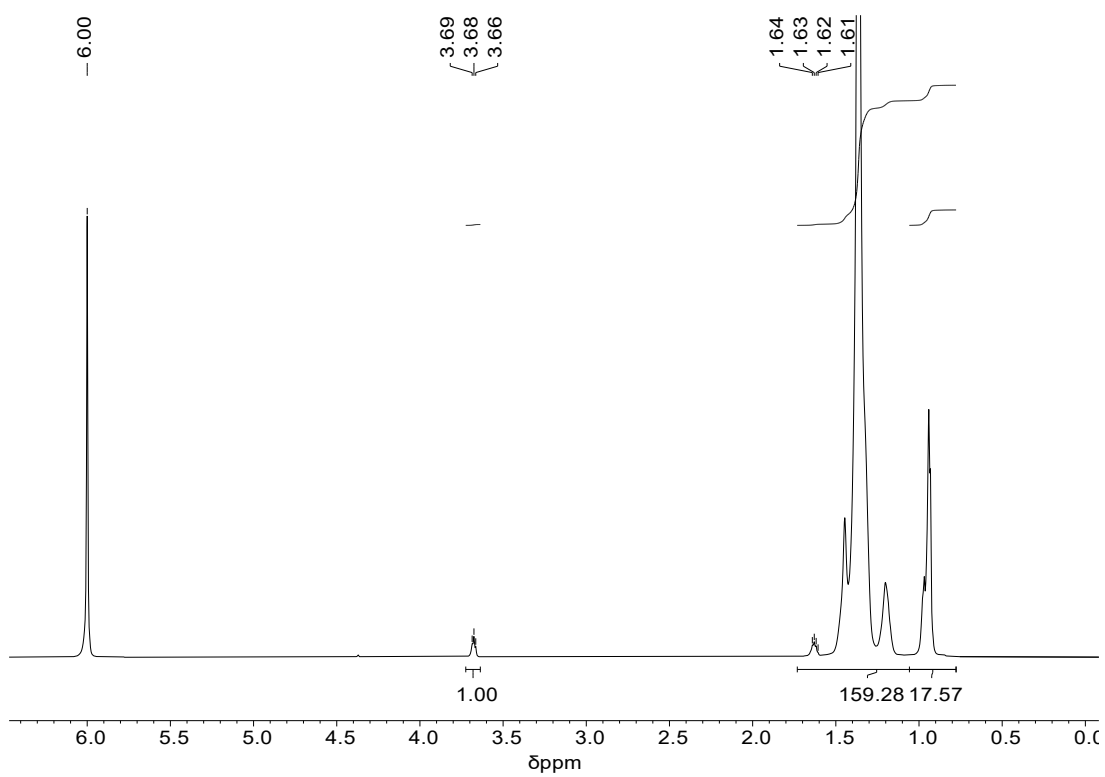

**Figure S40.** <sup>1</sup>H NMR spectrum (600 MHz) of poly(E-co-DA) (Entry 14, Table 2) in 1,1,2,2-tetrachloroethane-*d*<sub>2</sub> at 120 °C.

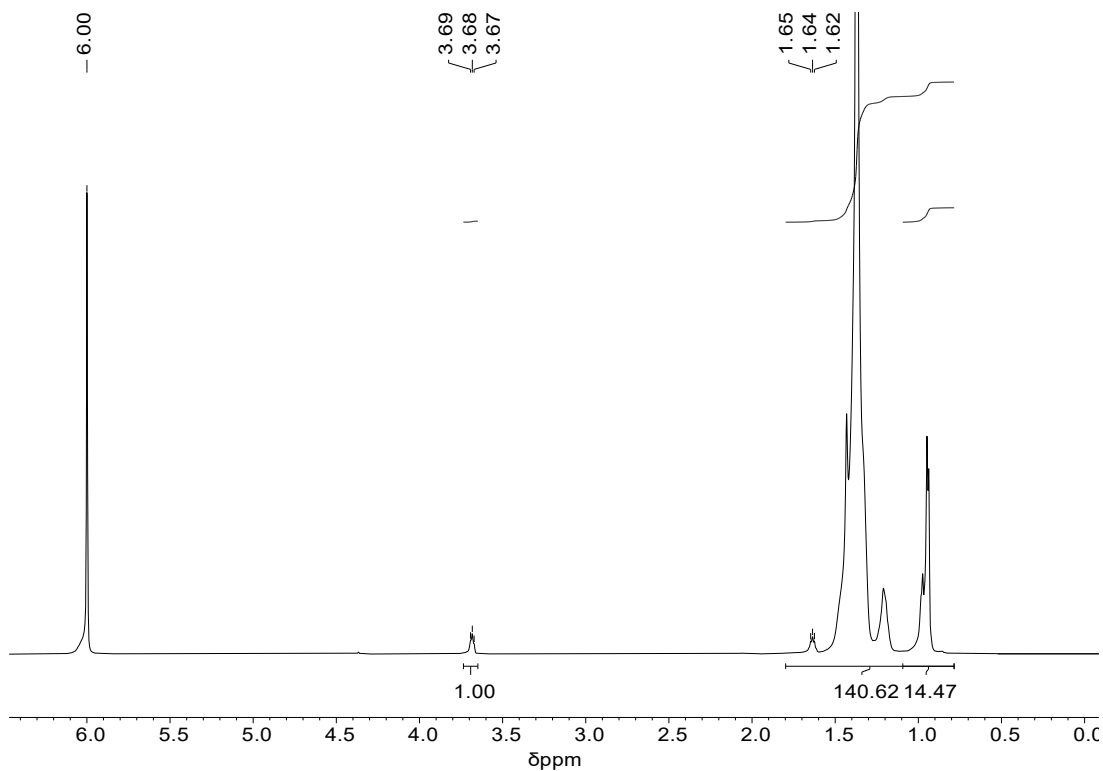

**Figure S41.**  $^1\text{H}$  NMR spectrum (600 MHz) of poly(E-co-DA) (Entry 15, Table 2) in 1,1,2,2-tetrachloroethane- $d_2$  at 120  $^\circ\text{C}$ .

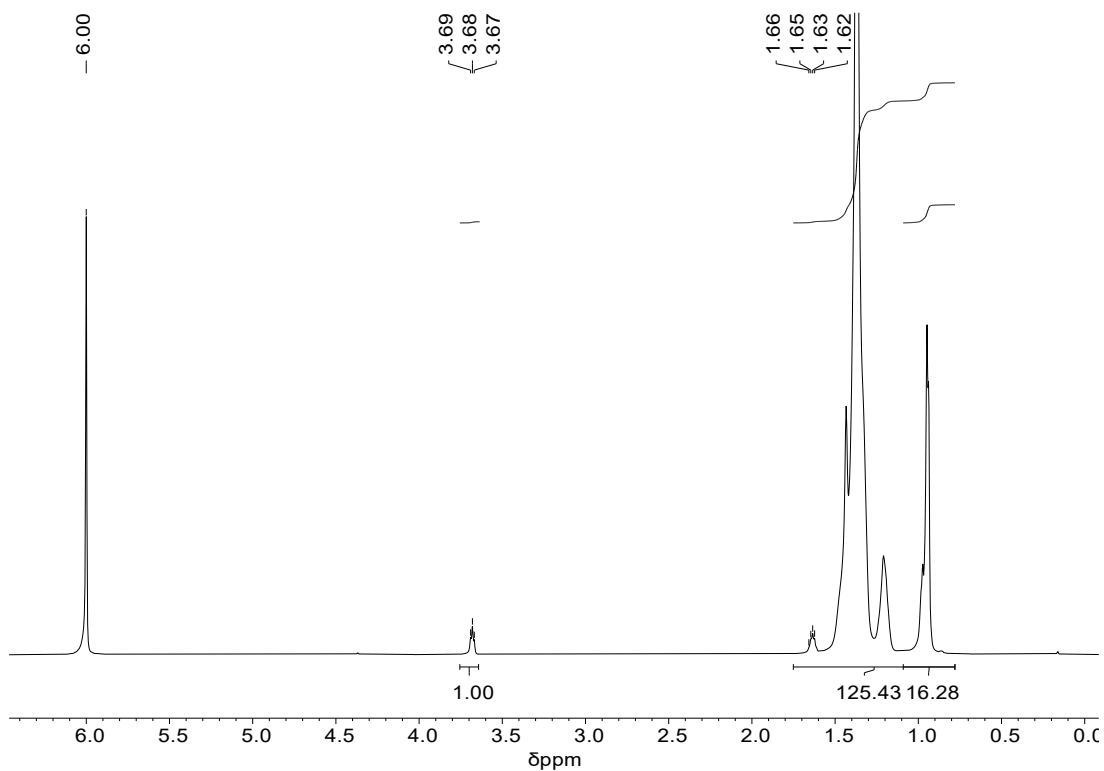

**Figure S42.**  $^1\text{H}$  NMR spectrum (600 MHz) of poly(E-co-DA) (Entry 17, Table 2) in 1,1,2,2-tetrachloroethane- $d_2$  at 120  $^\circ\text{C}$ .

#### 4) NMR Spectra of Poly(E-co-A-ol)

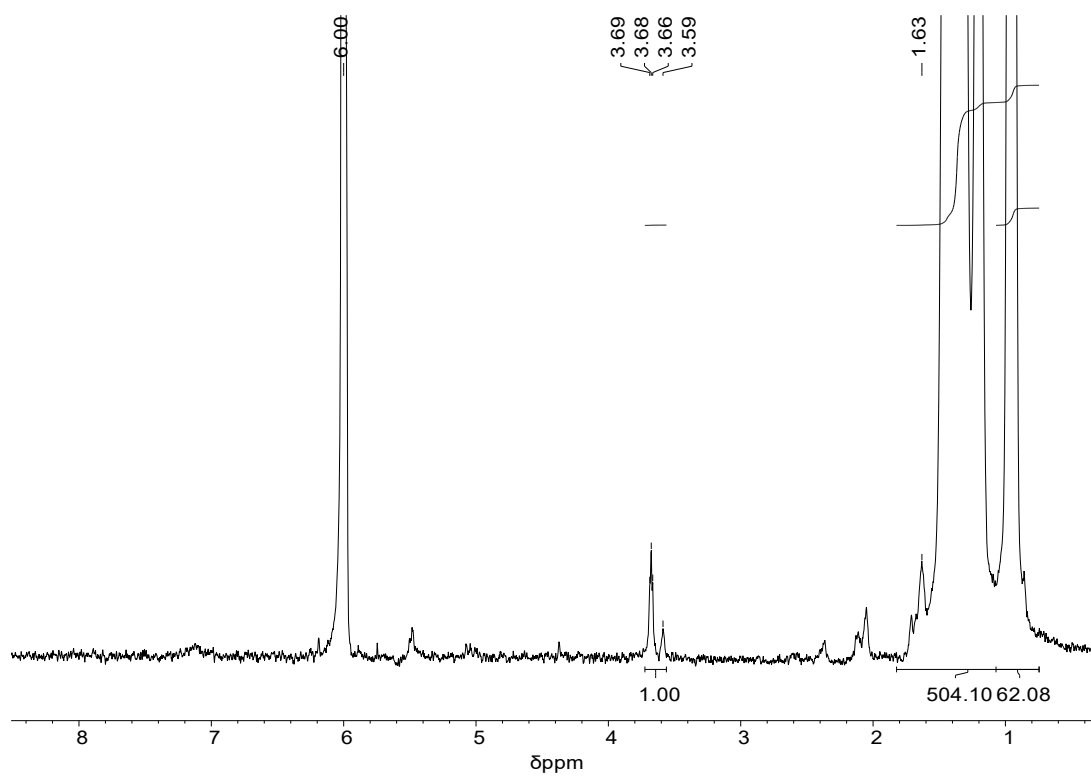

**Figure S43.** <sup>1</sup>H NMR spectrum (600 MHz) of poly(E-co-A-ol) (Entry 1, Table 2) in 1,1,2,2-tetrachloroethane-*d*<sub>2</sub> at 120 °C.

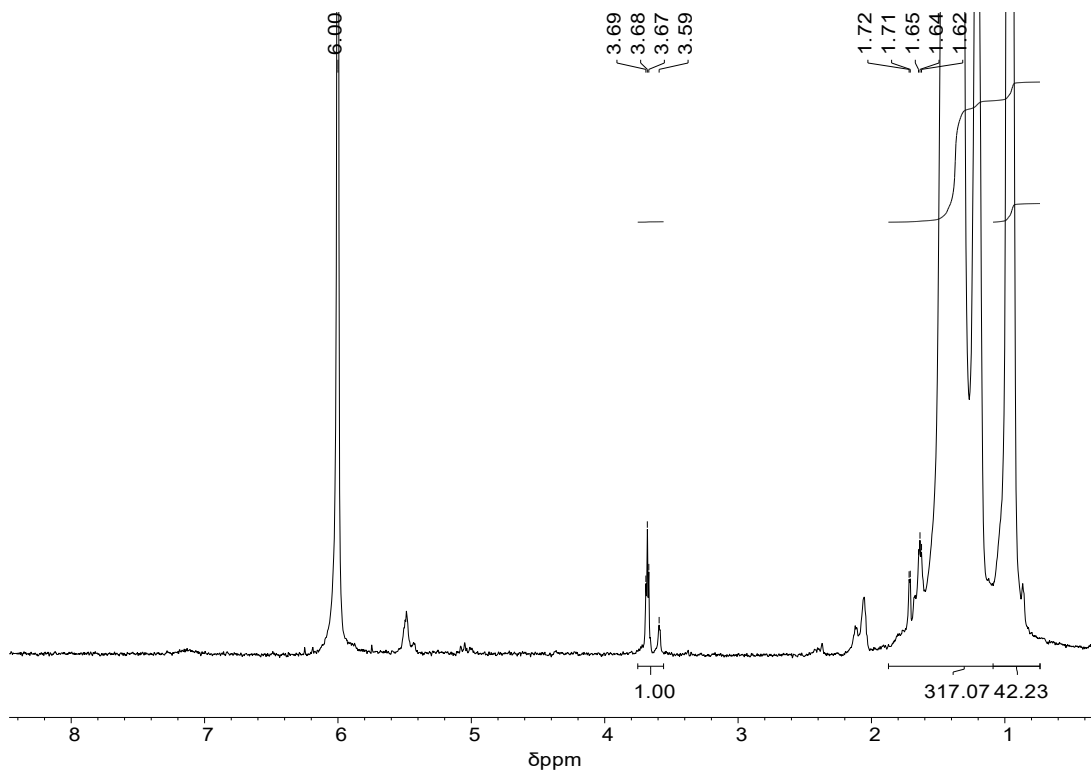

**Figure S44.**  $^1\text{H}$  NMR spectrum (600 MHz) of poly(E-co-A-ol) (Entry 2, Table 2) in 1,1,2,2-tetrachloroethane- $d_2$  at 120 °C.

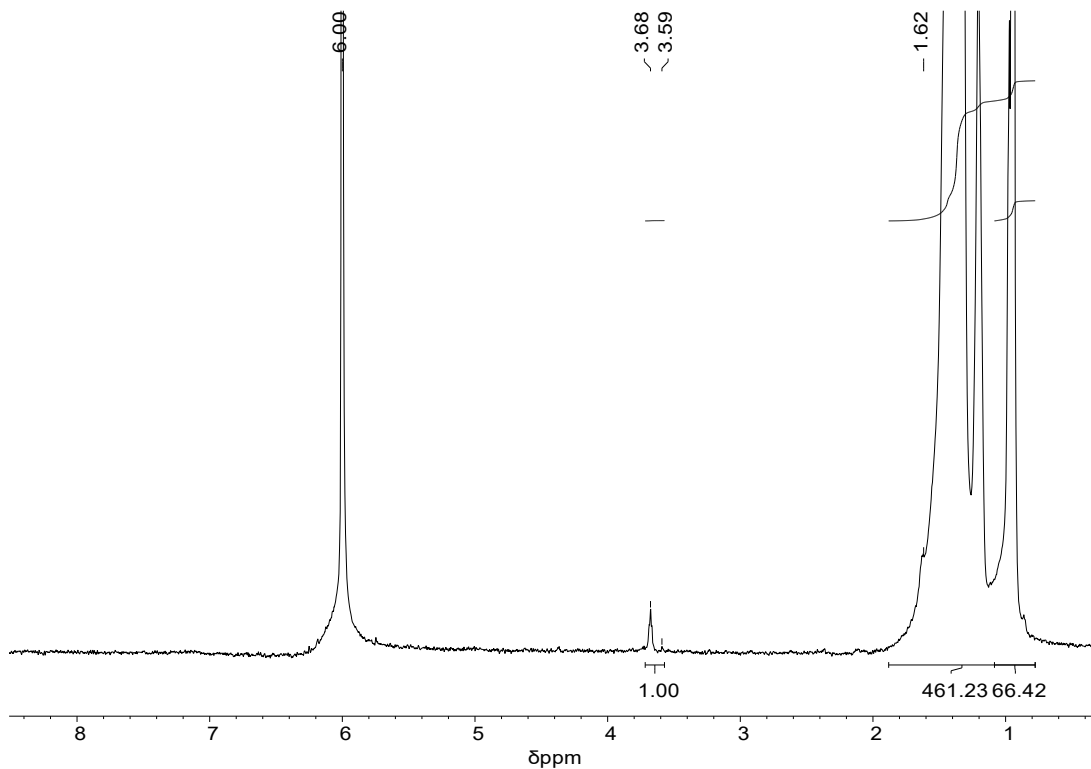

**Figure S45.**  $^1\text{H}$  NMR spectrum (600 MHz) of poly(E-co-A-ol) (Entry 4, Table 2) in 1,1,2,2-tetrachloroethane- $d_2$  at 120 °C.

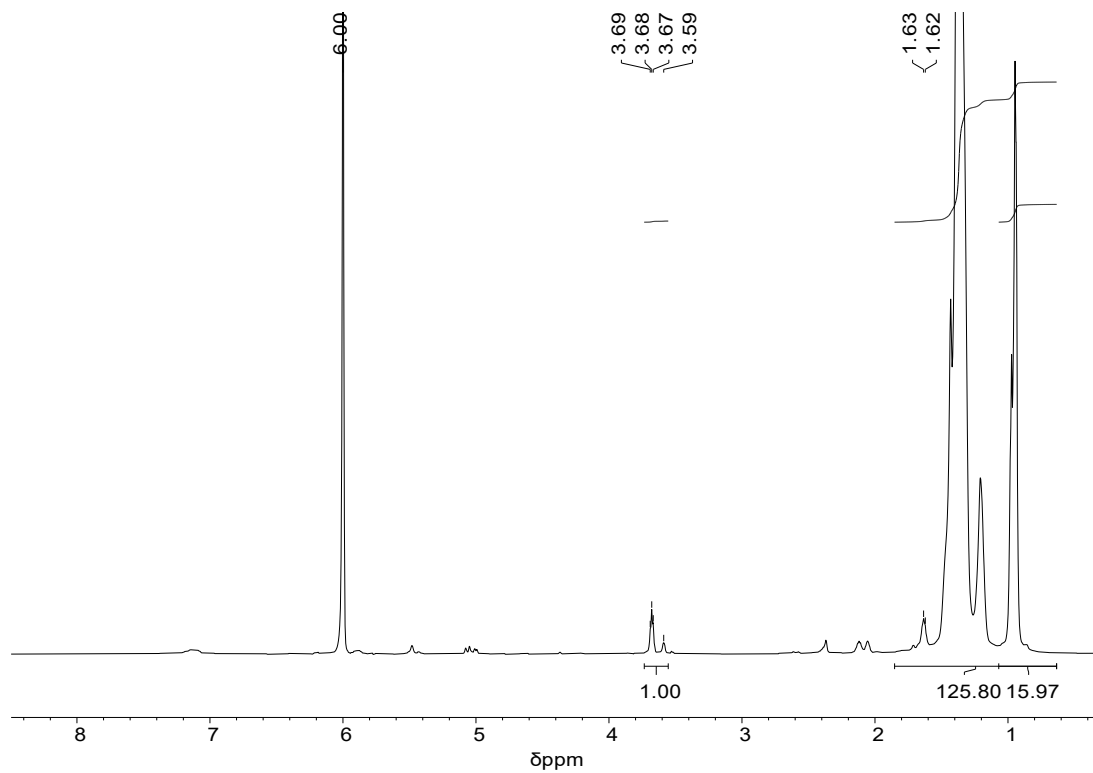

**Figure S46.** <sup>1</sup>H NMR spectrum (600 MHz) of poly(E-co-A-ol) (Entry 5, Table 2) in 1,1,2,2-tetrachloroethane-*d*<sub>2</sub> at 120 °C.

### 5) NMR Spectra of Poly(E-co-AAc)

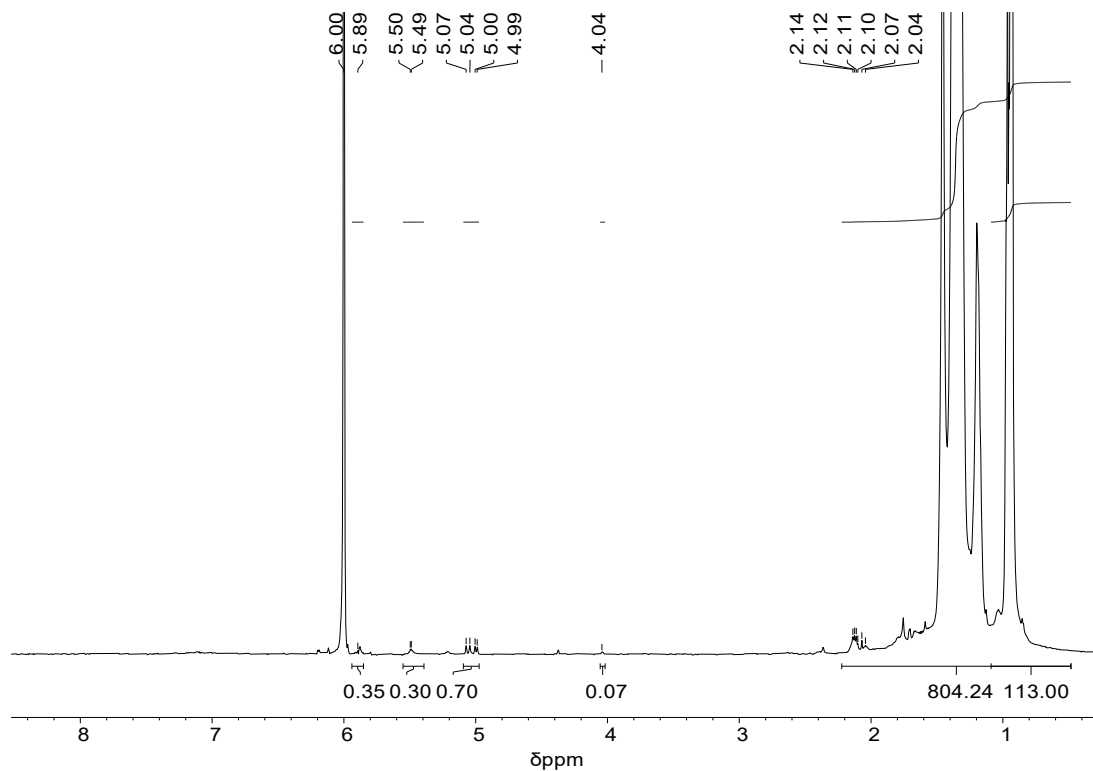

**Figure S47.** <sup>1</sup>H NMR spectrum (600 MHz) of poly(E-co-AAc) (Entry 1, Table 4) (little -OAc content but double bond detected) in 1,1,2,2-tetrachloroethane-*d*<sub>2</sub> at 120 °C.

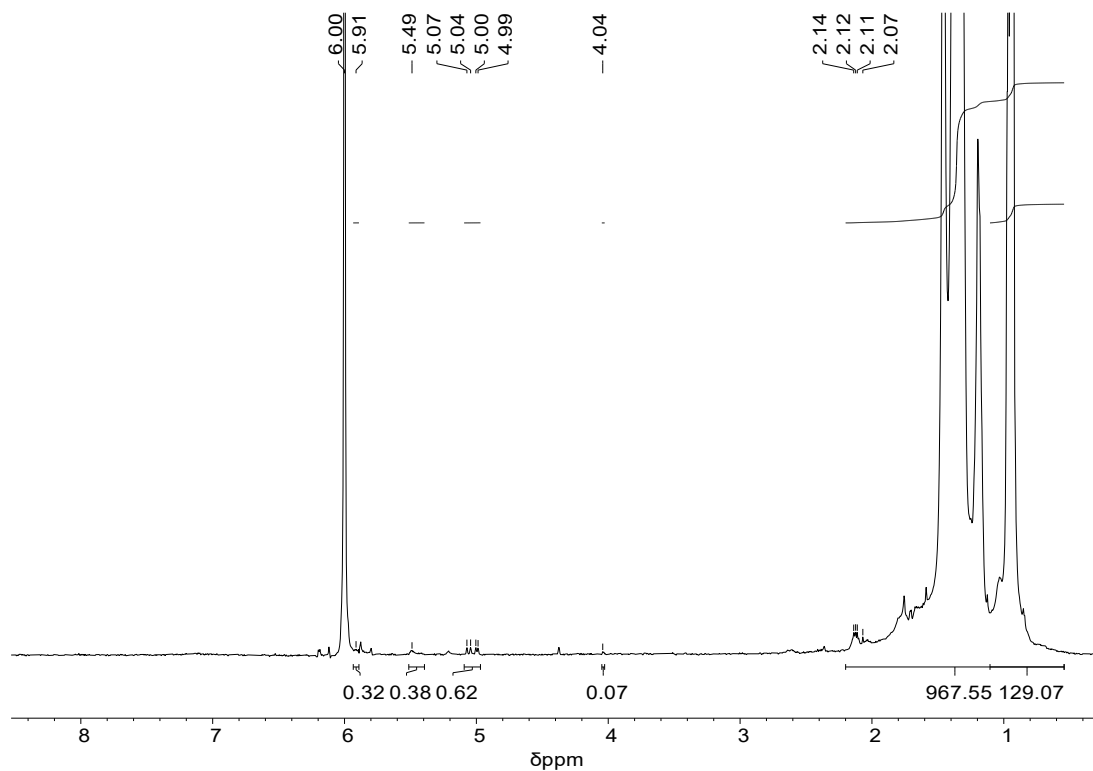

**Figure S48.** <sup>1</sup>H NMR spectrum (600 MHz) of poly(E-co-AAc) (Entry 3, Table 4) (no -OAc incorporation but double bond detected) in 1,1,2,2-tetrachloroethane-*d*<sub>2</sub> at 120 °C.

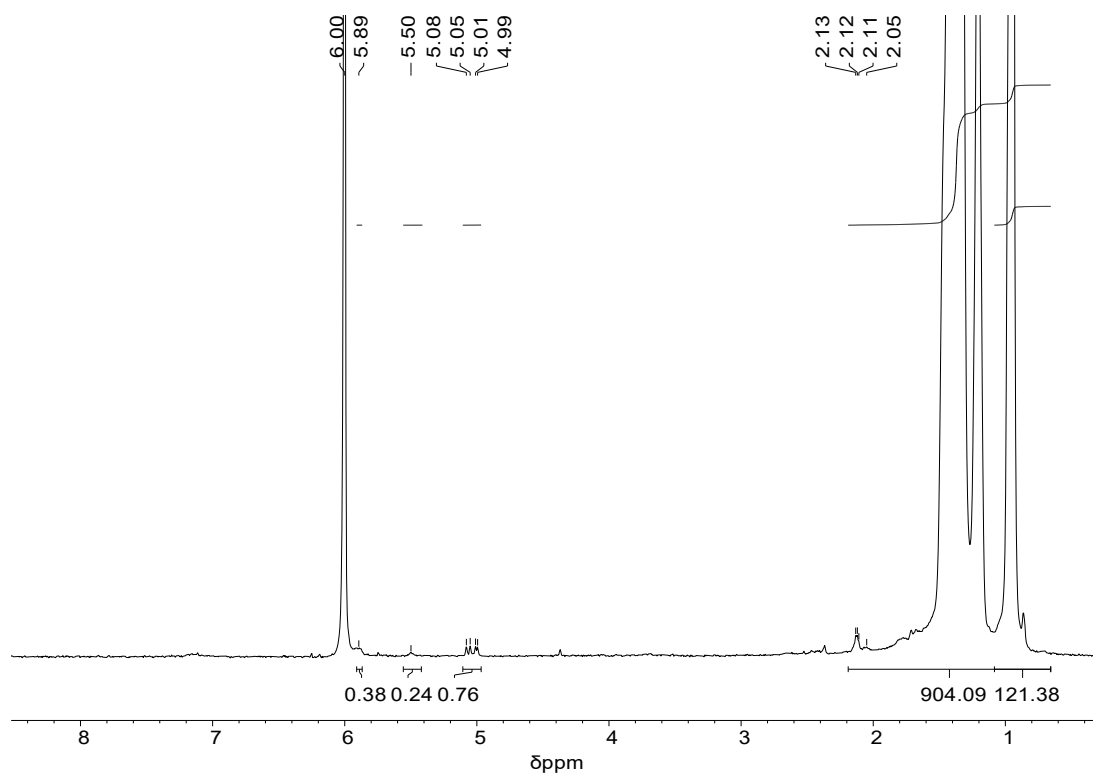

**Figure S49.**  $^1\text{H}$  NMR spectrum (600 MHz) of poly(E-co-AAc) (Entry 4, Table 4) (no -OAc incorporation but double bond detected) in 1,1,2,2-tetrachloroethane- $d_2$  at 120 °C.

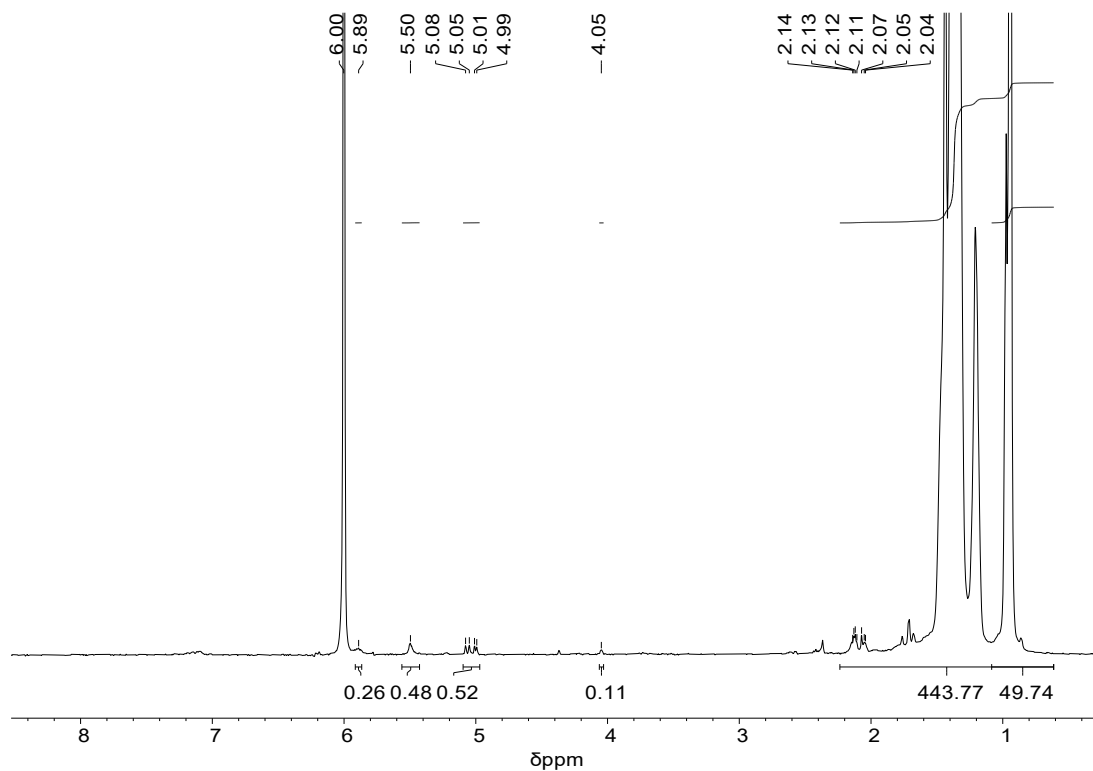

**Figure S50.**  $^1\text{H}$  NMR spectrum (600 MHz) of poly(E-co-AAc) (Entry 5, Table 4) (no -OAc incorporation but double bond detected) in 1,1,2,2-tetrachloroethane- $d_2$  at 120 °C.

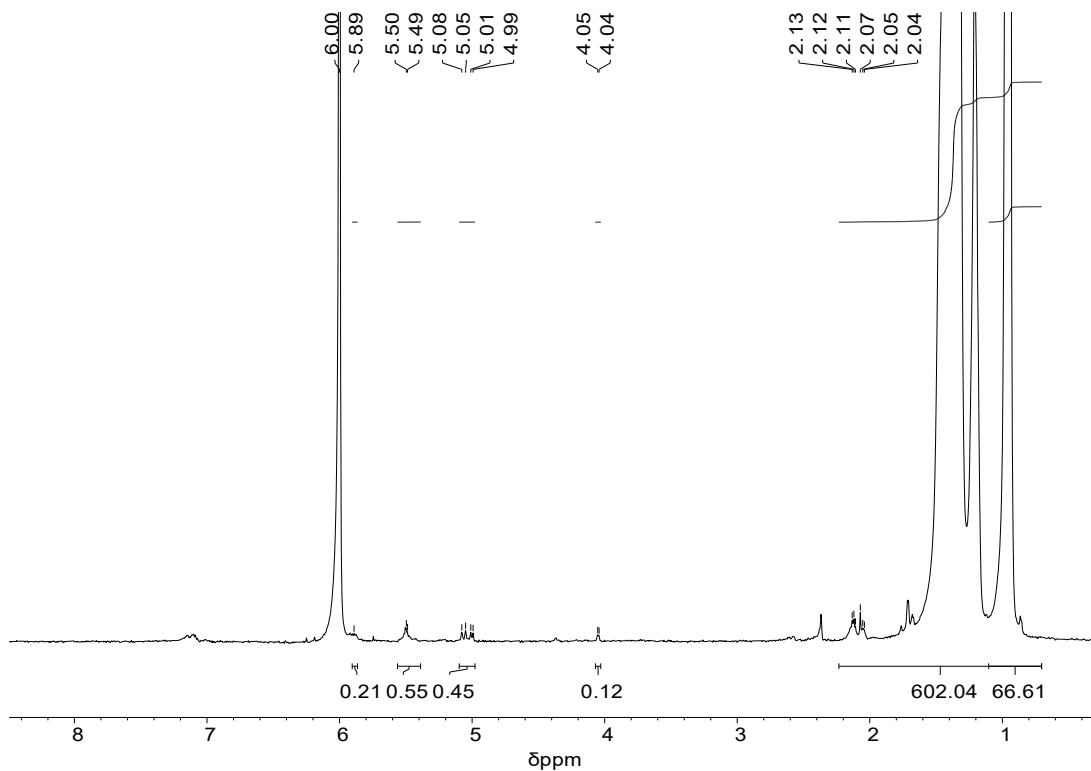

**Figure S51.** <sup>1</sup>H NMR spectrum (600 MHz) of poly(E-co-AAc) (Entry 6, Table 4) (no -OAc incorporation but double bond detected) in 1,1,2,2-tetrachloroethane-*d*<sub>2</sub> at 120 °C.

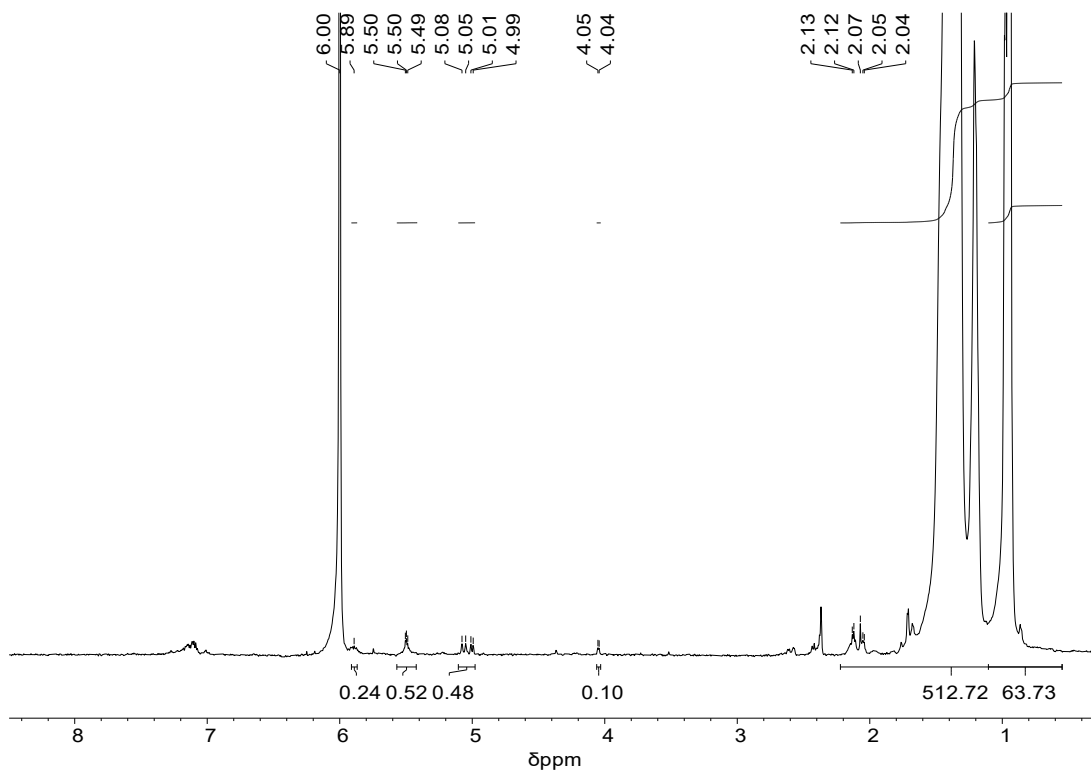

**Figure S52.** <sup>1</sup>H NMR spectrum (600 MHz) of poly(E-co-AAc) (Entry 7, Table 4) (no -OAc incorporation but double bond detected) in 1,1,2,2-tetrachloroethane-*d*<sub>2</sub> at 120 °C.



## 6) Representative NMR Spectra of Poly(E-co-Alkenol) after Acetylation

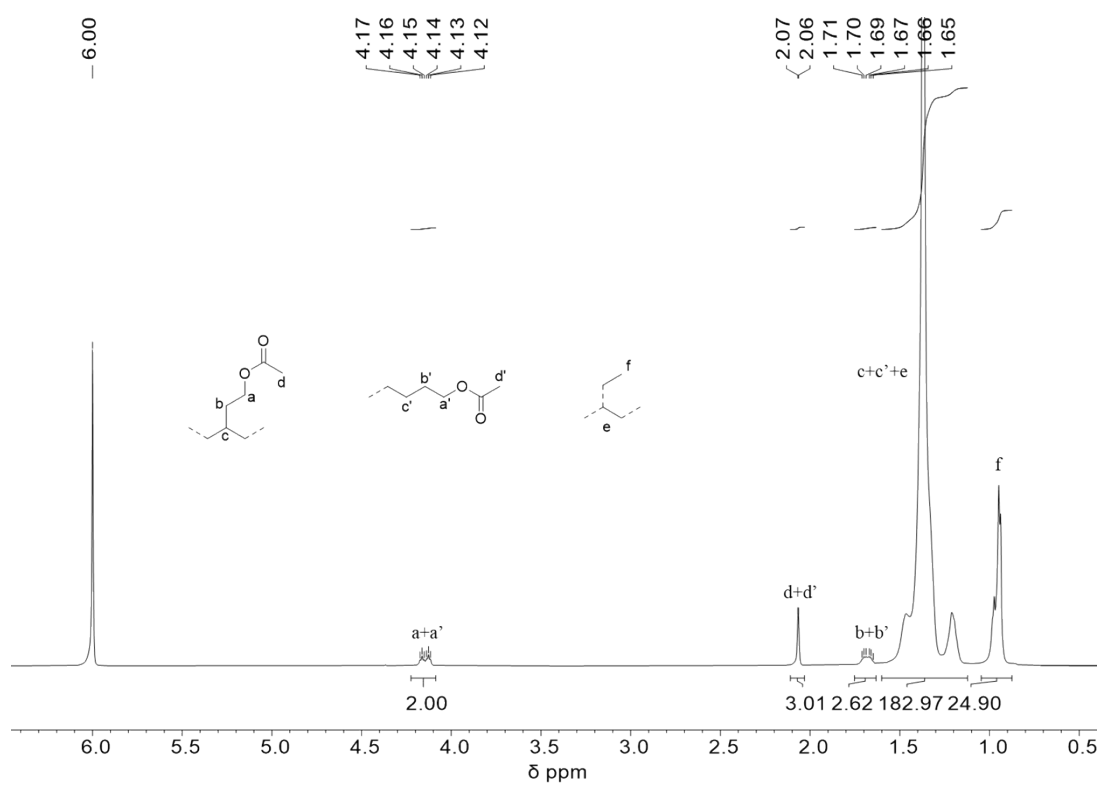

**Figure S53.**  $^1\text{H}$  NMR spectrum (600 MHz) of poly(E-co-HAA) (Entry 8, Table 2) after acetylation in 1,1,2,2-tetrachloroethane- $d_2$  at 120 °C.

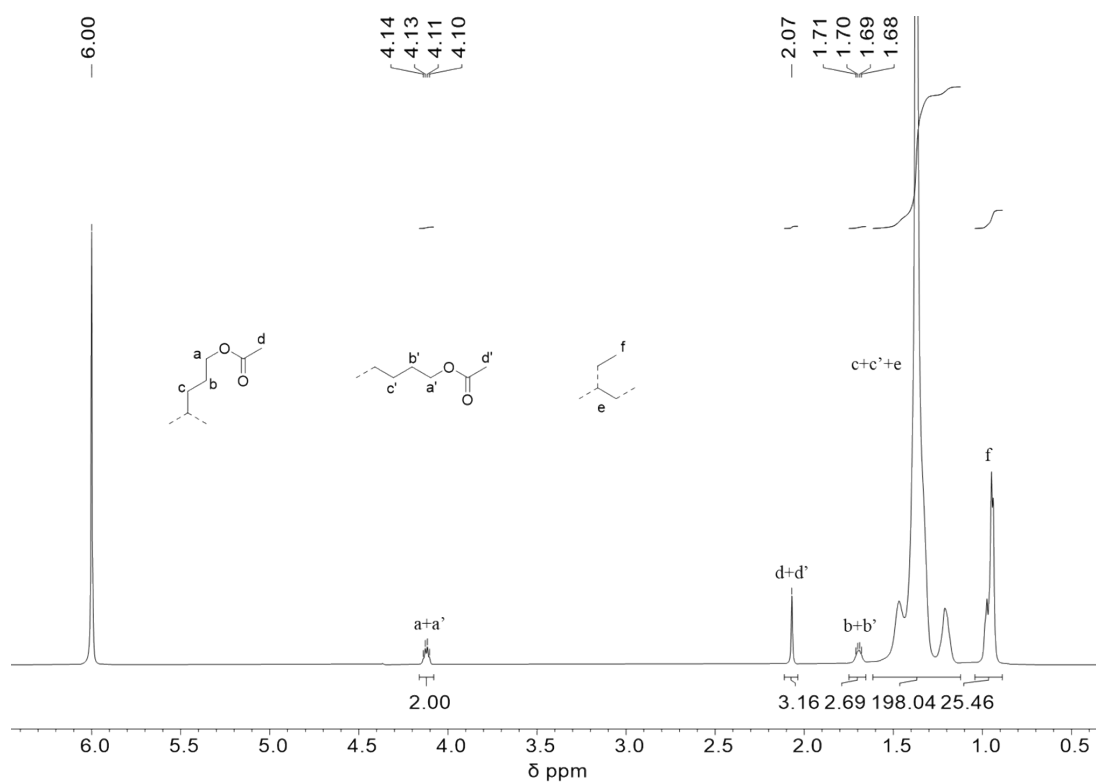

**Figure S54.**  $^1\text{H}$  NMR spectrum (600 MHz) of poly(*E-co*-PA) (Entry 12, Table 2) after acetylation in 1,1,2,2-tetrachloroethane- $d_2$  at 120 °C.

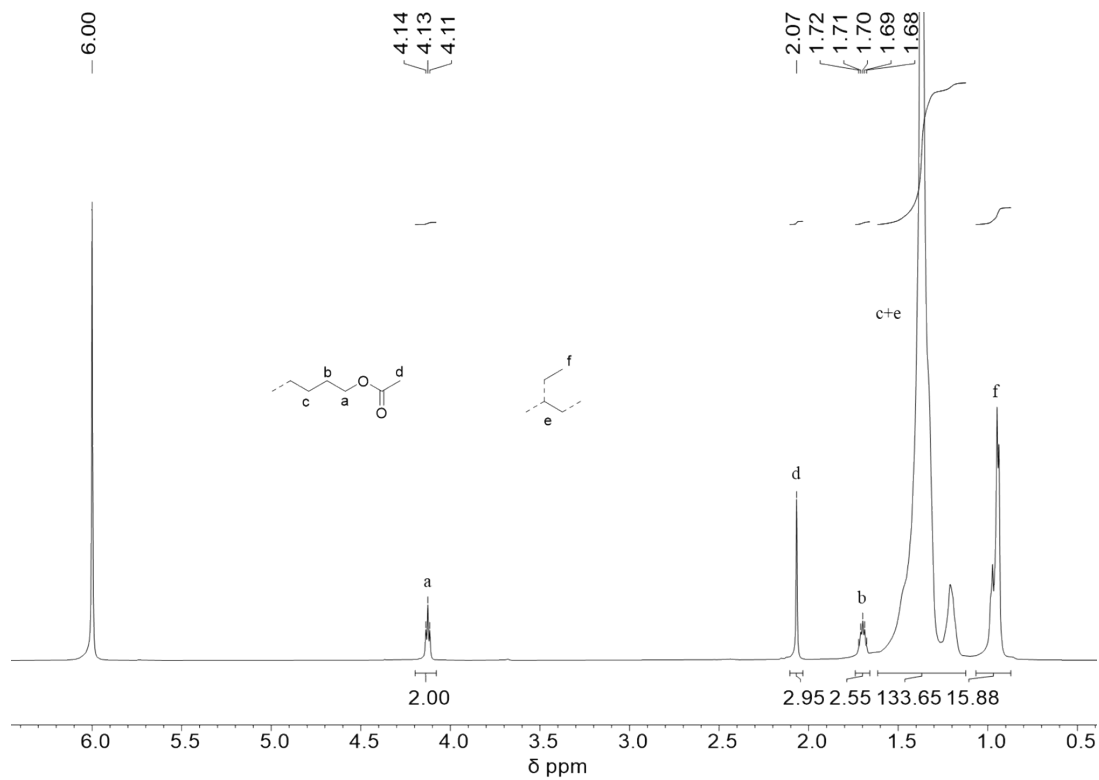

**Figure S55.**  $^1\text{H}$  NMR spectrum (600 MHz) of poly(*E-co*-DA) (Entry 16, Table 2) after acetylation in 1,1,2,2-tetrachloroethane- $d_2$  at 120 °C.

## 7) GPC Traces of Polymer Samples

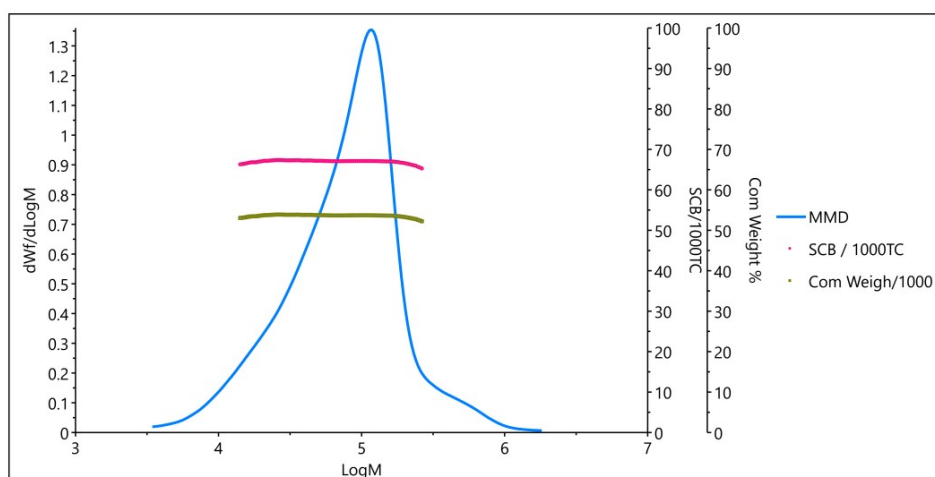

| Results            |               | Calibrations  |              |
|--------------------|---------------|---------------|--------------|
| Mw                 | 111511 g/mol  | Flow Marker   | 28.32 mL     |
| Mn                 | 46251 g/mol   | Mass constant | 0.45 mL·V/mg |
| Mw / Mn            | 2.41          |               |              |
| Mz                 | 259276 g/mol  | Performance   |              |
| Mp                 | 116137 g/mol  | Flow Marker   | 28.60 mL     |
| Mv                 | 99874 g/mol   | Mass recovery | 88 %         |
| IVmwd              | 1.86 dL/g     | Plate Count   | 1671         |
| Bulk CH3 / 1000C   | 67.21         |               |              |
| Bulk SCB / 1000C   | 66.58         |               |              |
| Bulk Comonomer Wt% | 53.26 %       |               |              |
| Pump Flow Rate     | 1.00 ml / min |               |              |
| Columns Temp       | 150 °C        |               |              |
| Detectors Temp     | 150 °C        |               |              |
| Nominal MHa        | 0.725         |               |              |
| Nominal MHK        | 0.00044       |               |              |

Figure S56. GPC trace of poly(E-co-HAA) (Entry 2, Table 1) after acetylation.

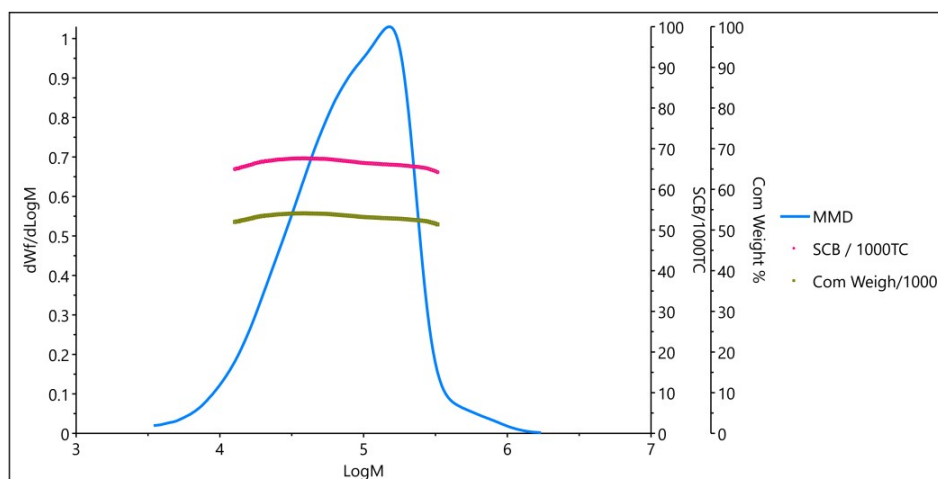

| Results            |               | Calibrations  |              |
|--------------------|---------------|---------------|--------------|
| Mw                 | 111504 g/mol  | Flow Marker   | 28.32 mL     |
| Mn                 | 46664 g/mol   | Mass constant | 0.45 mL·V/mg |
| Mw / Mn            | 2.39          |               |              |
| Mz                 | 225330 g/mol  | Performance   |              |
| Mp                 | 149748 g/mol  | Flow Marker   | 28.28 mL     |
| Mv                 | 100835 g/mol  | Mass recovery | 90 %         |
| IVmwd              | 1.87 dL/g     | Plate Count   | 3964         |
| Bulk CH3 / 1000C   | 66.75         |               |              |
| Bulk SCB / 1000C   | 66.12         |               |              |
| Bulk Comonomer Wt% | 52.89 %       |               |              |
| Pump Flow Rate     | 1.00 ml / min |               |              |
| Columns Temp       | 150 °C        |               |              |
| Detectors Temp     | 150 °C        |               |              |
| Nominal MHa        | 0.725         |               |              |
| Nominal MHK        | 0.00044       |               |              |

Figure S57. GPC trace of poly(E-co-HAA) (Entry 3, Table 1) after acetylation.

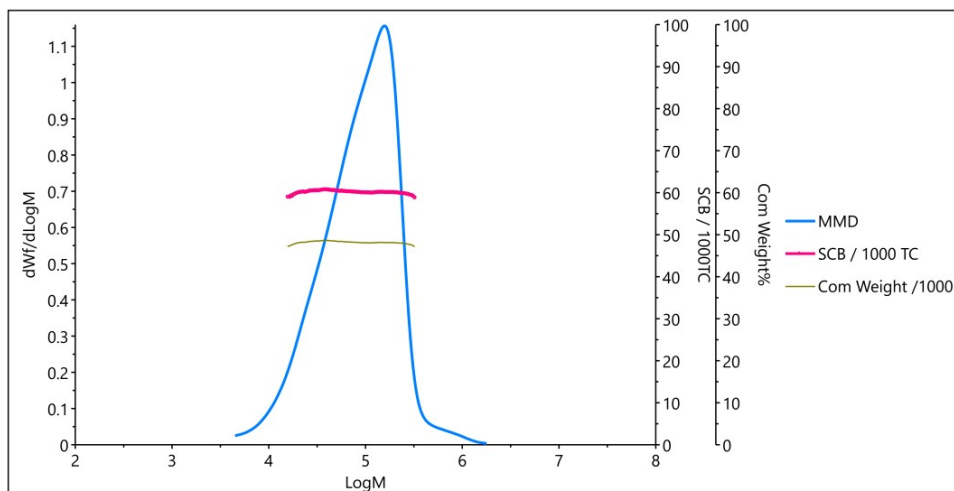

**Results**

|                            |        |                 |
|----------------------------|--------|-----------------|
| Mw                         | 119936 | g/mol           |
| Mn                         | 53905  | g/mol           |
| Mw / Mn                    | 2.22   |                 |
| Mz                         | 235724 | g/mol           |
| Mp                         | 156314 | g/mol           |
| Mv                         | 108182 | g/mol           |
| IVmwd                      | 1.5404 | dL/g            |
| Bulk CH3 / 1000C           | 60.331 |                 |
| Corrected Bulk CH3 / 1000C | 59.8   | CH3/1000TC corr |

**Calibrations**

|                     |       |         |
|---------------------|-------|---------|
| Calib Flow Marker   | 28.02 | mL      |
| Calib Mass constant | 0.28  | mL·V/mg |

**Performance**

|               |       |    |
|---------------|-------|----|
| Flow Marker   | 27.94 | mL |
| Mass recovery | 79    | %  |
| Plate Count   | 18640 |    |

**Figure S58.** GPC trace of poly(E-co-HAA) (Entry 4, Table 1; Entry 6, Table 2) after acetylation.

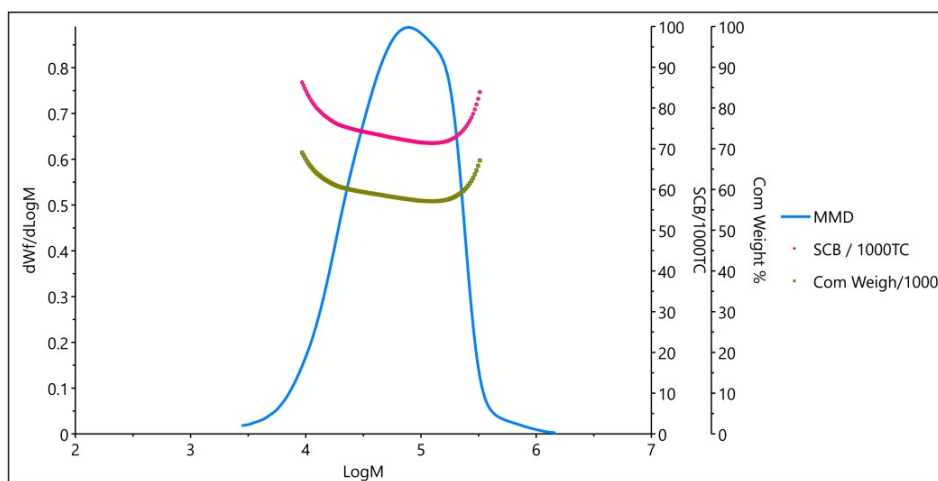

**Results**

|                    |         |          |
|--------------------|---------|----------|
| Mw                 | 93575   | g/mol    |
| Mn                 | 38265   | g/mol    |
| Mw / Mn            | 2.45    |          |
| Mz                 | 188205  | g/mol    |
| Mp                 | 78061   | g/mol    |
| Mv                 | 84339   | g/mol    |
| IVmwd              | 1.65    | dL/g     |
| Bulk CH3 / 1000C   | 78.03   |          |
| Bulk SCB / 1000C   | 77.26   |          |
| Bulk Comonomer Wt% | 61.81   | %        |
| Pump Flow Rate     | 1.00    | ml / min |
| Columns Temp       | 150     | °C       |
| Detectors Temp     | 150     | °C       |
| Nominal MHa        | 0.725   |          |
| Nominal MHK        | 0.00044 |          |

**Calibrations**

|               |       |         |
|---------------|-------|---------|
| Flow Marker   | 28.32 | mL      |
| Mass constant | 0.45  | mL·V/mg |

**Performance**

|               |       |    |
|---------------|-------|----|
| Flow Marker   | 28.27 | mL |
| Mass recovery | 90    | %  |
| Plate Count   | 3924  |    |

**Figure S59.** GPC trace of poly(E-co-HAA) (Entry 5, Table 1) after acetylation.

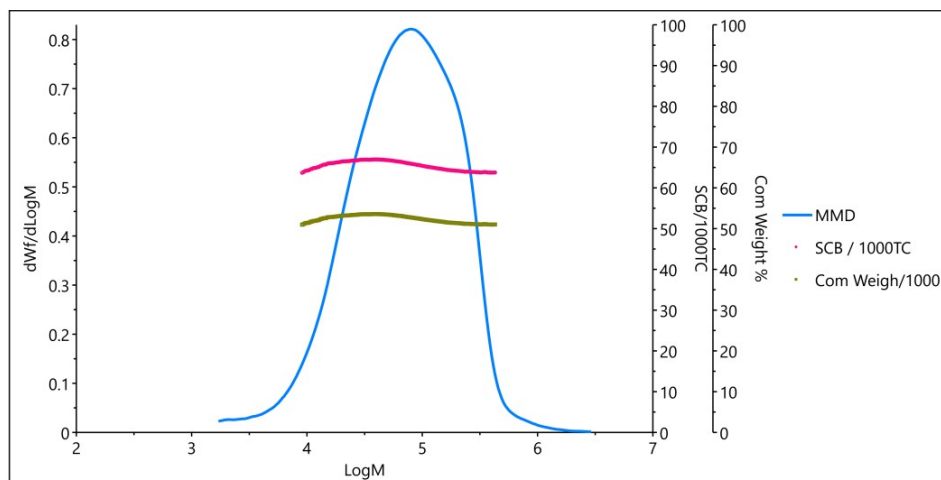

**Results**

|                    |         |          |
|--------------------|---------|----------|
| Mw                 | 110132  | g/mol    |
| Mn                 | 35528   | g/mol    |
| Mw / Mn            | 3.10    |          |
| Mz                 | 262586  | g/mol    |
| Mp                 | 80034   | g/mol    |
| Mv                 | 97088   | g/mol    |
| IVmwd              | 1.82    | dL/g     |
| Bulk CH3 / 1000C   | 66.22   |          |
| Bulk SCB / 1000C   | 65.38   |          |
| Bulk Comonomer Wt% | 52.31   | %        |
| Pump Flow Rate     | 1.00    | ml / min |
| Columns Temp       | 150     | °C       |
| Detectors Temp     | 150     | °C       |
| Nominal MHa        | 0.725   |          |
| Nominal MHK        | 0.00044 |          |

**Calibrations**

|               |       |         |
|---------------|-------|---------|
| Flow Marker   | 28.32 | mL      |
| Mass constant | 0.45  | mL·V/mg |

**Performance**

|               |       |    |
|---------------|-------|----|
| Flow Marker   | 28.28 | mL |
| Mass recovery | 85    | %  |
| Plate Count   | 2474  |    |

**Figure S60.** GPC trace of poly(E-co-HAA) (Entry 6, Table 1) after acetylation.

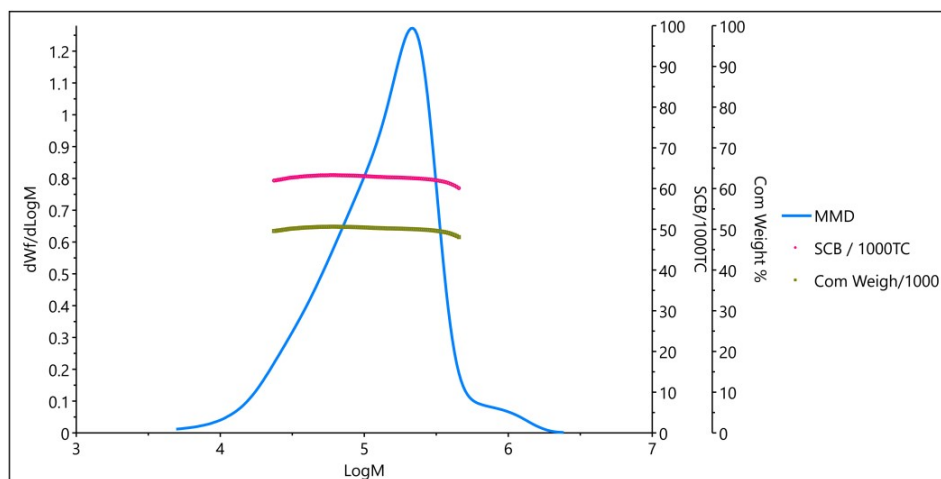

**Results**

|                    |         |          |
|--------------------|---------|----------|
| Mw                 | 181121  | g/mol    |
| Mn                 | 78973   | g/mol    |
| Mw / Mn            | 2.29    |          |
| Mz                 | 359538  | g/mol    |
| Mp                 | 214299  | g/mol    |
| Mv                 | 164635  | g/mol    |
| IVmwd              | 2.67    | dL/g     |
| Bulk CH3 / 1000C   | 62.41   |          |
| Bulk SCB / 1000C   | 62.04   |          |
| Bulk Comonomer Wt% | 49.63   | %        |
| Pump Flow Rate     | 1.00    | ml / min |
| Columns Temp       | 150     | °C       |
| Detectors Temp     | 150     | °C       |
| Nominal MHa        | 0.725   |          |
| Nominal MHK        | 0.00044 |          |

**Calibrations**

|               |       |         |
|---------------|-------|---------|
| Flow Marker   | 28.16 | mL      |
| Mass constant | 0.45  | mL·V/mg |

**Performance**

|               |       |    |
|---------------|-------|----|
| Flow Marker   | 28.11 | mL |
| Mass recovery | 88    | %  |
| Plate Count   | 12524 |    |

**Figure S61.** GPC trace of poly(E-co-HAA) (Entry 7, Table 1) after acetylation.

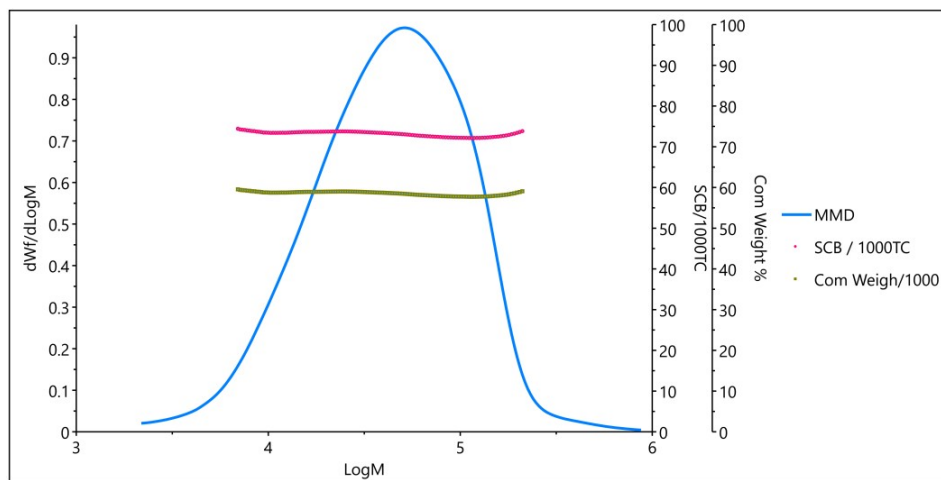

|                    |         |          |
|--------------------|---------|----------|
| <b>Results</b>     |         |          |
| Mw                 | 61221   | g/mol    |
| Mn                 | 27007   | g/mol    |
| Mw / Mn            | 2.27    |          |
| Mz                 | 120944  | g/mol    |
| Mp                 | 51253   | g/mol    |
| Mv                 | 55476   | g/mol    |
| IVmwd              | 1.21    | dL/g     |
| Bulk CH3 / 1000C   | 74.71   |          |
| Bulk SCB / 1000C   | 73.63   |          |
| Bulk Comonomer Wt% | 58.90   | %        |
| Pump Flow Rate     | 1.00    | ml / min |
| Columns Temp       | 150     | °C       |
| Detectors Temp     | 150     | °C       |
| Nominal MHa        | 0.725   |          |
| Nominal MHK        | 0.00044 |          |

|                     |              |
|---------------------|--------------|
| <b>Calibrations</b> |              |
| Flow Marker         | 28.16 mL     |
| Mass constant       | 0.45 mL·V/mg |

|                    |          |
|--------------------|----------|
| <b>Performance</b> |          |
| Flow Marker        | 28.16 mL |
| Mass recovery      | 86 %     |
| Plate Count        | 14312    |

Figure S62. GPC trace of poly(E-co-HAA) (Entry 8, Table 1) after acetylation.

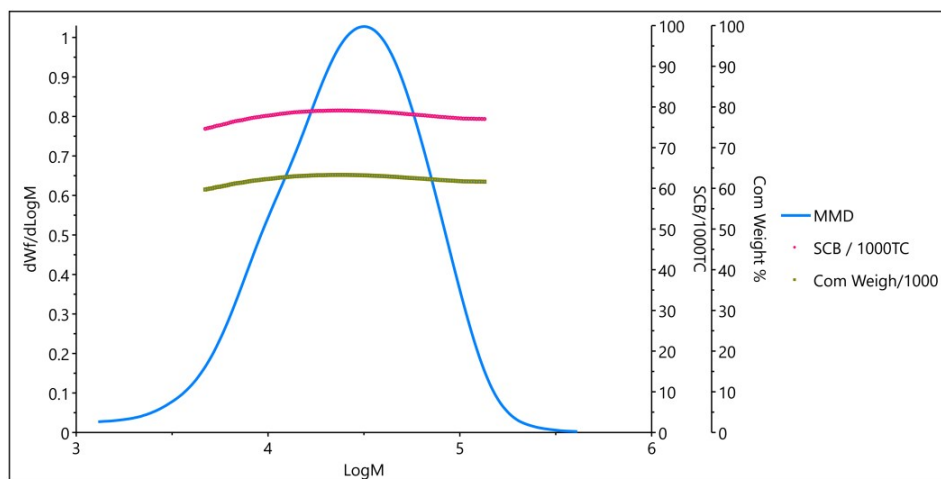

|                    |         |          |
|--------------------|---------|----------|
| <b>Results</b>     |         |          |
| Mw                 | 36923   | g/mol    |
| Mn                 | 16714   | g/mol    |
| Mw / Mn            | 2.21    |          |
| Mz                 | 66079   | g/mol    |
| Mp                 | 31627   | g/mol    |
| Mv                 | 33726   | g/mol    |
| IVmwd              | 0.85    | dL/g     |
| Bulk CH3 / 1000C   | 79.70   |          |
| Bulk SCB / 1000C   | 77.97   |          |
| Bulk Comonomer Wt% | 62.38   | %        |
| Pump Flow Rate     | 1.00    | ml / min |
| Columns Temp       | 150     | °C       |
| Detectors Temp     | 150     | °C       |
| Nominal MHa        | 0.725   |          |
| Nominal MHK        | 0.00044 |          |

|                     |              |
|---------------------|--------------|
| <b>Calibrations</b> |              |
| Flow Marker         | 28.16 mL     |
| Mass constant       | 0.45 mL·V/mg |

|                    |          |
|--------------------|----------|
| <b>Performance</b> |          |
| Flow Marker        | 28.16 mL |
| Mass recovery      | 83 %     |
| Plate Count        | 14515    |

Figure S63. GPC trace of poly(E-co-HAA) (Entry 9, Table 1) after acetylation.

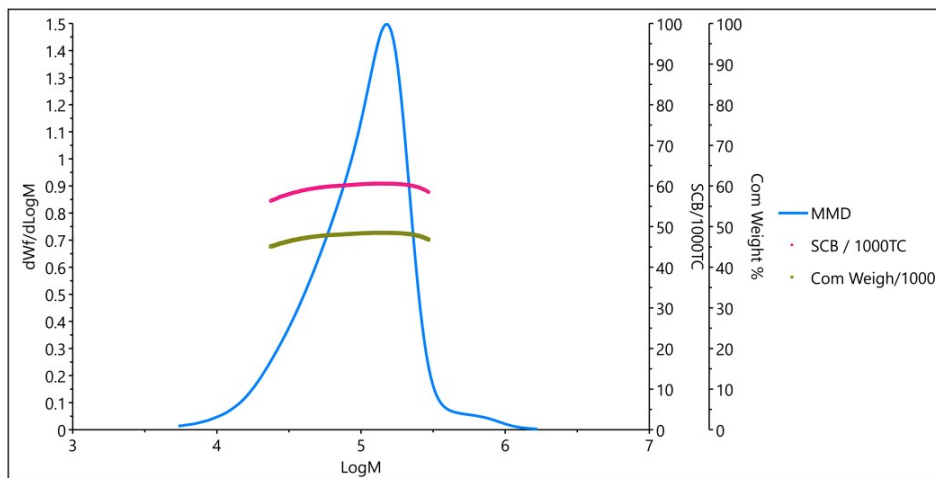

**Results**

|                    |         |          |
|--------------------|---------|----------|
| Mw                 | 128294  | g/mol    |
| Mn                 | 68062   | g/mol    |
| Mw / Mn            | 1.88    |          |
| Mz                 | 225782  | g/mol    |
| Mp                 | 149988  | g/mol    |
| Mv                 | 119131  | g/mol    |
| IVmwd              | 2.11    | dL/g     |
| Bulk CH3 / 1000C   | 59.03   |          |
| Bulk SCB / 1000C   | 58.60   |          |
| Bulk Comonomer Wt% | 46.88   | %        |
| Pump Flow Rate     | 1.00    | ml / min |
| Columns Temp       | 150     | °C       |
| Detectors Temp     | 150     | °C       |
| Nominal MHa        | 0.725   |          |
| Nominal MHK        | 0.00044 |          |

**Calibrations**

|               |       |         |
|---------------|-------|---------|
| Flow Marker   | 28.16 | mL      |
| Mass constant | 0.45  | mL·V/mg |

**Performance**

|               |       |    |
|---------------|-------|----|
| Flow Marker   | 28.16 | mL |
| Mass recovery | 88    | %  |
| Plate Count   | 14419 |    |

**Figure S64.** GPC trace of poly(E-co-HAA) (Entry 10, Table 1) after acetylation.

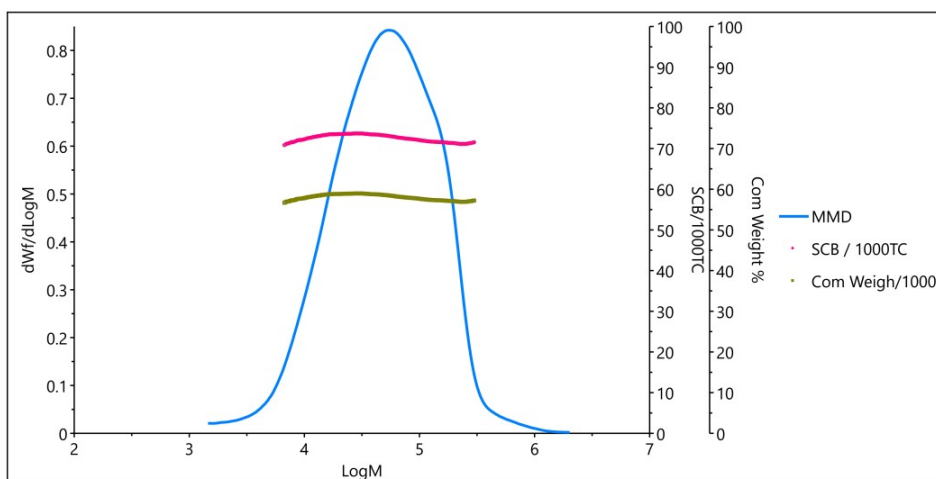

**Results**

|                    |         |          |
|--------------------|---------|----------|
| Mw                 | 79530   | g/mol    |
| Mn                 | 27245   | g/mol    |
| Mw / Mn            | 2.92    |          |
| Mz                 | 199686  | g/mol    |
| Mp                 | 54679   | g/mol    |
| Mv                 | 69893   | g/mol    |
| IVmwd              | 1.44    | dL/g     |
| Bulk CH3 / 1000C   | 73.74   |          |
| Bulk SCB / 1000C   | 72.65   |          |
| Bulk Comonomer Wt% | 58.12   | %        |
| Pump Flow Rate     | 1.00    | ml / min |
| Columns Temp       | 150     | °C       |
| Detectors Temp     | 150     | °C       |
| Nominal MHa        | 0.725   |          |
| Nominal MHK        | 0.00044 |          |

**Calibrations**

|               |       |         |
|---------------|-------|---------|
| Flow Marker   | 28.32 | mL      |
| Mass constant | 0.45  | mL·V/mg |

**Performance**

|               |       |    |
|---------------|-------|----|
| Flow Marker   | 28.24 | mL |
| Mass recovery | 86    | %  |
| Plate Count   | 4672  |    |

**Figure S65.** GPC trace of poly(E-co-HAA) (Entry 11, Table 1) after acetylation.

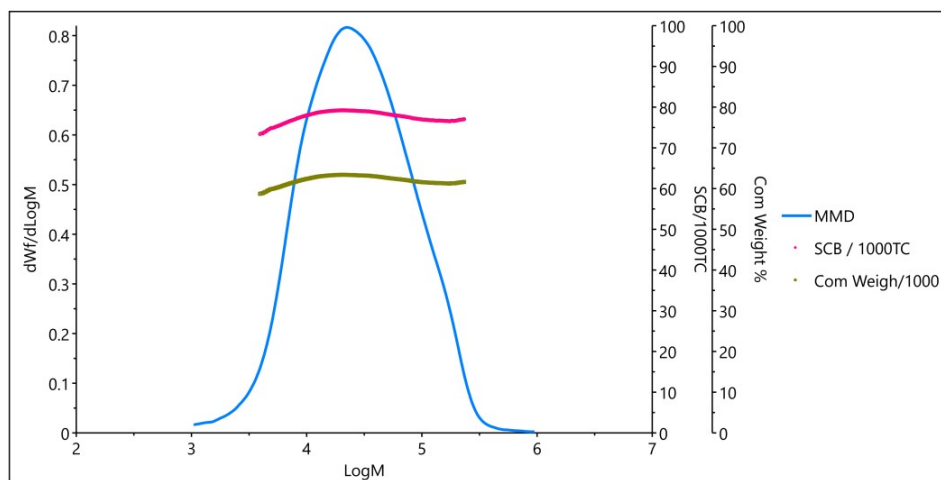

**Results**

|                    |         |          |
|--------------------|---------|----------|
| Mw                 | 46250   | g/mol    |
| Mn                 | 15913   | g/mol    |
| Mw / Mn            | 2.91    |          |
| Mz                 | 113746  | g/mol    |
| Mp                 | 22537   | g/mol    |
| Mv                 | 40227   | g/mol    |
| IVmwd              | 0.96    | dL/g     |
| Bulk CH3 / 1000C   | 79.60   |          |
| Bulk SCB / 1000C   | 77.77   |          |
| Bulk Comonomer Wt% | 62.21   | %        |
| Pump Flow Rate     | 1.00    | ml / min |
| Columns Temp       | 150     | °C       |
| Detectors Temp     | 150     | °C       |
| Nominal MHa        | 0.725   |          |
| Nominal MHK        | 0.00044 |          |

**Calibrations**

|               |       |         |
|---------------|-------|---------|
| Flow Marker   | 28.32 | mL      |
| Mass constant | 0.45  | mL·V/mg |

**Performance**

|               |       |    |
|---------------|-------|----|
| Flow Marker   | 28.27 | mL |
| Mass recovery | 91    | %  |
| Plate Count   | 4546  |    |

**Figure S66.** GPC trace of poly(E-co-HAA) (Entry 12, Table 1) after acetylation.

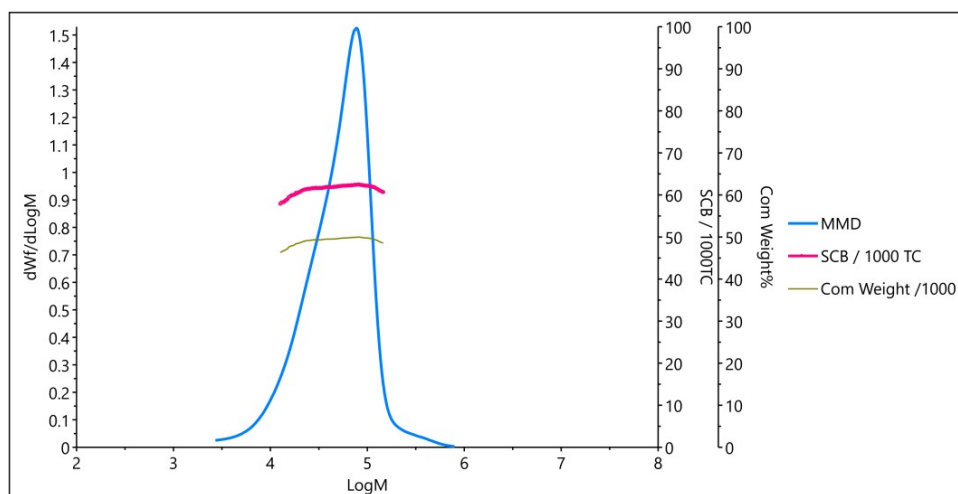

**Results**

|                            |        |                 |
|----------------------------|--------|-----------------|
| Mw                         | 63805  | g/mol           |
| Mn                         | 34026  | g/mol           |
| Mw / Mn                    | 1.88   |                 |
| Mz                         | 108490 | g/mol           |
| Mp                         | 76476  | g/mol           |
| Mv                         | 58970  | g/mol           |
| IVmwd                      | 1.0116 | dL/g            |
| Bulk CH3 / 1000C           | 61.675 |                 |
| Corrected Bulk CH3 / 1000C | 60.8   | CH3/1000TC corr |

**Calibrations**

|                     |       |         |
|---------------------|-------|---------|
| Calib Flow Marker   | 28.02 | mL      |
| Calib Mass constant | 0.28  | mL·V/mg |

**Performance**

|               |       |    |
|---------------|-------|----|
| Flow Marker   | 28.11 | mL |
| Mass recovery | 82    | %  |
| Plate Count   | 17076 |    |

**Figure S67.** GPC trace of poly(E-co-HAA) (Entry 13, Table 1) after acetylation.



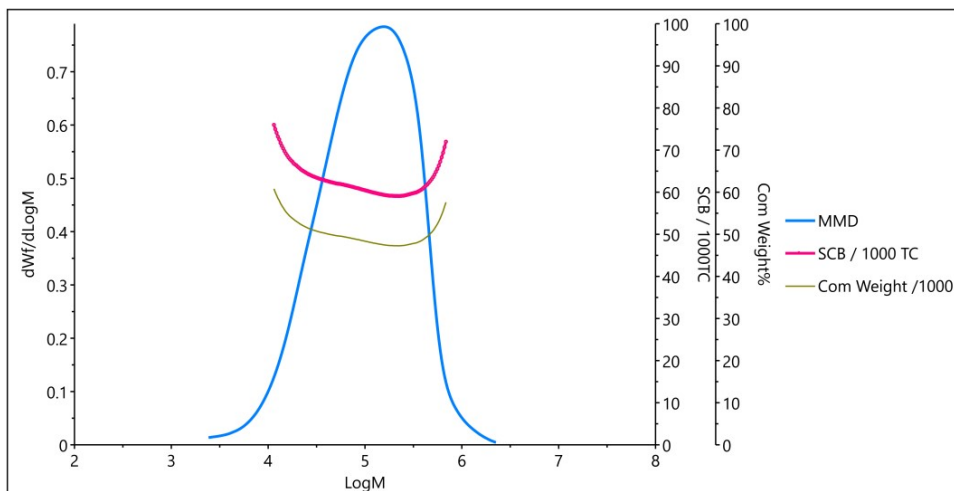

**Results**

|                            |        |                 |
|----------------------------|--------|-----------------|
| Mw                         | 170245 | g/mol           |
| Mn                         | 52710  | g/mol           |
| Mw / Mn                    | 3.23   |                 |
| Mz                         | 380527 | g/mol           |
| Mp                         | 155739 | g/mol           |
| Mv                         | 147404 | g/mol           |
| IVmwd                      | 1.9087 | dL/g            |
| Bulk CH3 / 1000C           | 65.282 |                 |
| Corrected Bulk CH3 / 1000C | 64.7   | CH3/1000TC corr |

**Calibrations**

|                     |       |         |
|---------------------|-------|---------|
| Calib Flow Marker   | 27.97 | mL      |
| Calib Mass constant | 0.28  | mL·V/mg |

**Performance**

|               |       |    |
|---------------|-------|----|
| Flow Marker   | 27.80 | mL |
| Mass recovery | 82    | %  |
| Plate Count   | 22055 |    |

**Figure S68.** GPC trace of poly(E-co-HAA) (Entry 14, Table 1) after acetylation.

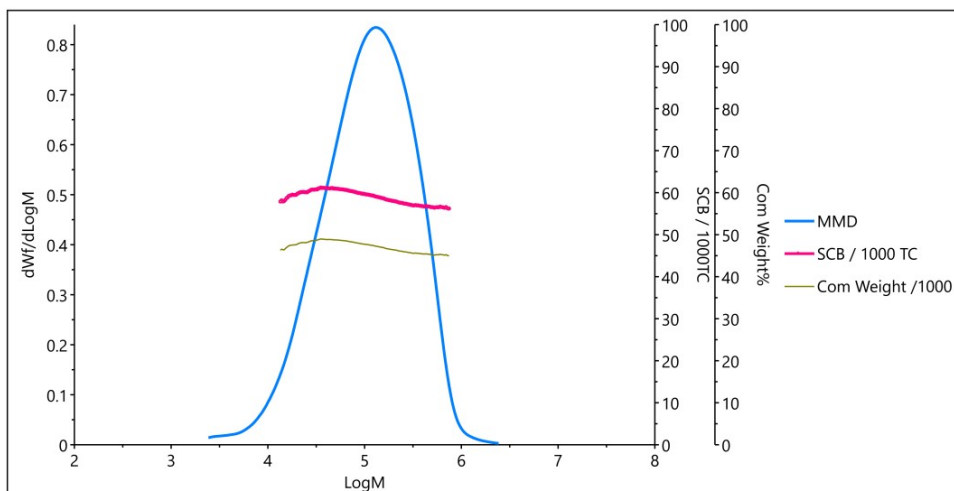

**Results**

|                            |        |                 |
|----------------------------|--------|-----------------|
| Mw                         | 173059 | g/mol           |
| Mn                         | 56342  | g/mol           |
| Mw / Mn                    | 3.07   |                 |
| Mz                         | 359738 | g/mol           |
| Mp                         | 131137 | g/mol           |
| Mv                         | 151325 | g/mol           |
| IVmwd                      | 1.9438 | dL/g            |
| Bulk CH3 / 1000C           | 59.264 |                 |
| Corrected Bulk CH3 / 1000C | 58.7   | CH3/1000TC corr |

**Calibrations**

|                     |       |         |
|---------------------|-------|---------|
| Calib Flow Marker   | 28.02 | mL      |
| Calib Mass constant | 0.28  | mL·V/mg |

**Performance**

|               |       |    |
|---------------|-------|----|
| Flow Marker   | 28.08 | mL |
| Mass recovery | 86    | %  |
| Plate Count   | 17815 |    |

**Figure S69.** GPC trace of poly(E-co-HAA) (Entry 15, Table 1) after acetylation.

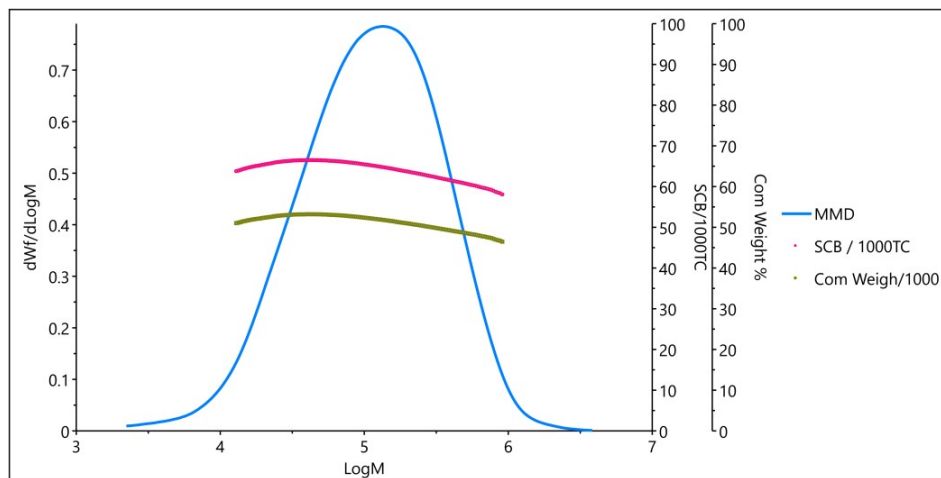

**Results**

|                    |         |          |
|--------------------|---------|----------|
| Mw                 | 187684  | g/mol    |
| Mn                 | 56261   | g/mol    |
| Mw / Mn            | 3.34    |          |
| Mz                 | 452934  | g/mol    |
| Mp                 | 134826  | g/mol    |
| Mv                 | 163396  | g/mol    |
| IVmwd              | 2.66    | dL/g     |
| Bulk CH3 / 1000C   | 64.50   |          |
| Bulk SCB / 1000C   | 63.97   |          |
| Bulk Comonomer Wt% | 51.17   | %        |
| Pump Flow Rate     | 1.00    | ml / min |
| Columns Temp       | 150     | °C       |
| Detectors Temp     | 150     | °C       |
| Nominal MHa        | 0.725   |          |
| Nominal MHK        | 0.00044 |          |

**Calibrations**

|               |       |         |
|---------------|-------|---------|
| Flow Marker   | 28.16 | mL      |
| Mass constant | 0.45  | mL·V/mg |

**Performance**

|               |       |    |
|---------------|-------|----|
| Flow Marker   | 28.11 | mL |
| Mass recovery | 85    | %  |
| Plate Count   | 12546 |    |

**Figure S70.** GPC trace of poly(E-co-HAA) (Entry 16, Table 1) after acetylation.

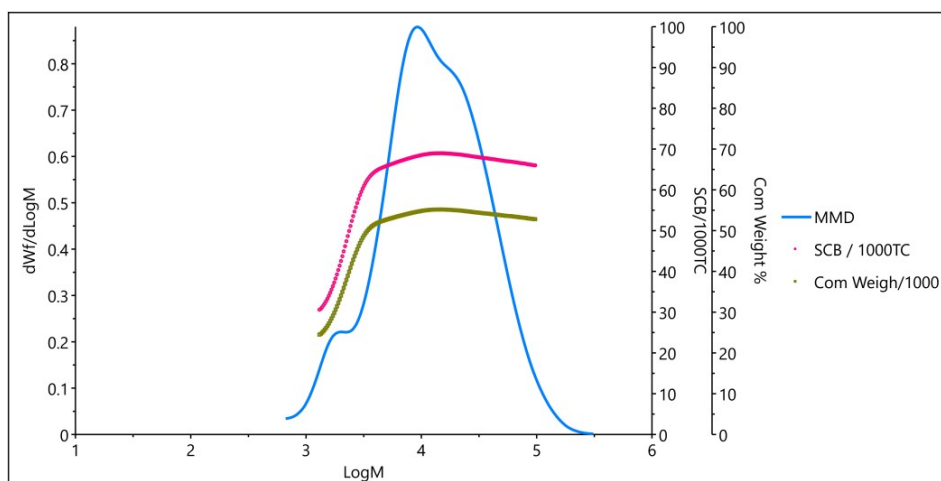

**Results**

|                    |         |          |
|--------------------|---------|----------|
| Mw                 | 20628   | g/mol    |
| Mn                 | 7085    | g/mol    |
| Mw / Mn            | 2.91    |          |
| Mz                 | 47802   | g/mol    |
| Mp                 | 9262    | g/mol    |
| Mv                 | 18076   | g/mol    |
| IVmwd              | 0.54    | dL/g     |
| Bulk CH3 / 1000C   | 69.11   |          |
| Bulk SCB / 1000C   | 65.03   |          |
| Bulk Comonomer Wt% | 52.03   | %        |
| Pump Flow Rate     | 1.00    | ml / min |
| Columns Temp       | 150     | °C       |
| Detectors Temp     | 150     | °C       |
| Nominal MHa        | 0.725   |          |
| Nominal MHK        | 0.00044 |          |

**Calibrations**

|               |       |         |
|---------------|-------|---------|
| Flow Marker   | 28.32 | mL      |
| Mass constant | 0.45  | mL·V/mg |

**Performance**

|               |       |    |
|---------------|-------|----|
| Flow Marker   | 28.37 | mL |
| Mass recovery | 96    | %  |
| Plate Count   | 736   |    |

**Figure S71.** GPC trace of poly(E-co-A-ol) (Entry 1, Table 2).

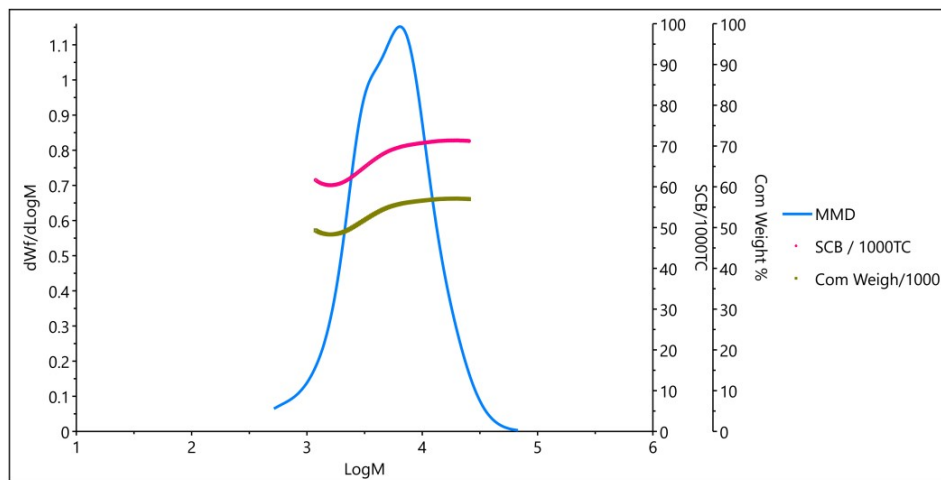

#### Results

|                    |         |          |
|--------------------|---------|----------|
| Mw                 | 7138    | g/mol    |
| Mn                 | 3770    | g/mol    |
| Mw / Mn            | 1.89    |          |
| Mz                 | 12531   | g/mol    |
| Mp                 | 6389    | g/mol    |
| Mv                 | 6575    | g/mol    |
| IVmwd              | 0.26    | dL/g     |
| Bulk CH3 / 1000C   | 75.17   |          |
| Bulk SCB / 1000C   | 67.65   |          |
| Bulk Comonomer Wt% | 54.12   | %        |
| Pump Flow Rate     | 1.00    | ml / min |
| Columns Temp       | 150     | °C       |
| Detectors Temp     | 150     | °C       |
| Nominal MHa        | 0.725   |          |
| Nominal MHK        | 0.00044 |          |

#### Calibrations

|               |       |         |
|---------------|-------|---------|
| Flow Marker   | 28.32 | mL      |
| Mass constant | 0.45  | mL·V/mg |

#### Performance

|               |       |    |
|---------------|-------|----|
| Flow Marker   | 28.43 | mL |
| Mass recovery | 95    | %  |
| Plate Count   | 10976 |    |

Figure S72. GPC trace of poly(E-co-A-ol) (Entry 2, Table 2).

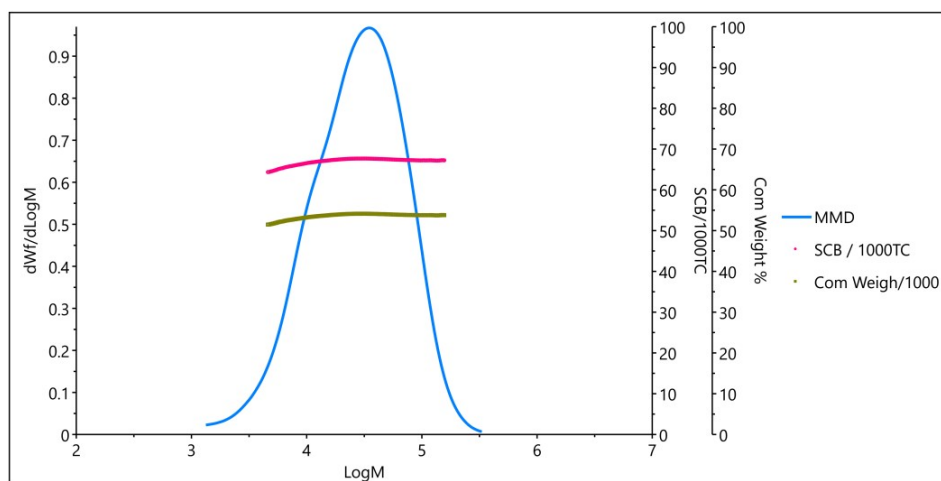

#### Results

|                    |         |          |
|--------------------|---------|----------|
| Mw                 | 40113   | g/mol    |
| Mn                 | 17210   | g/mol    |
| Mw / Mn            | 2.33    |          |
| Mz                 | 73294   | g/mol    |
| Mp                 | 34877   | g/mol    |
| Mv                 | 36420   | g/mol    |
| IVmwd              | 0.90    | dL/g     |
| Bulk CH3 / 1000C   | 68.71   |          |
| Bulk SCB / 1000C   | 67.02   |          |
| Bulk Comonomer Wt% | 53.61   | %        |
| Pump Flow Rate     | 1.00    | ml / min |
| Columns Temp       | 150     | °C       |
| Detectors Temp     | 150     | °C       |
| Nominal MHa        | 0.725   |          |
| Nominal MHK        | 0.00044 |          |

#### Calibrations

|               |       |         |
|---------------|-------|---------|
| Flow Marker   | 28.32 | mL      |
| Mass constant | 0.45  | mL·V/mg |

#### Performance

|               |       |    |
|---------------|-------|----|
| Flow Marker   | 28.48 | mL |
| Mass recovery | 94    | %  |
| Plate Count   | 8720  |    |

Figure S73. GPC trace of poly(E-co-A-ol) (Entry 3, Table 2).

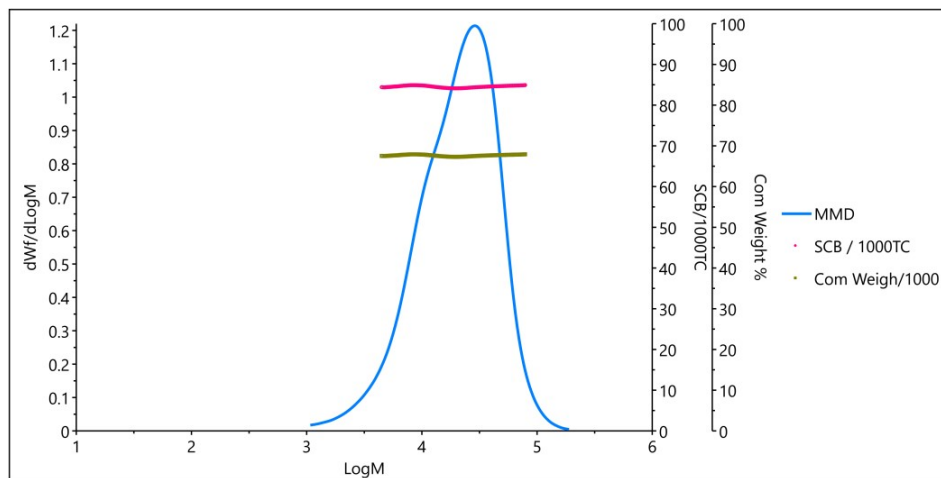

**Results**

|                    |         |          |
|--------------------|---------|----------|
| Mw                 | 26246   | g/mol    |
| Mn                 | 13851   | g/mol    |
| Mw / Mn            | 1.89    |          |
| Mz                 | 40665   | g/mol    |
| Mp                 | 28776   | g/mol    |
| Mv                 | 24499   | g/mol    |
| IVmwd              | 0.67    | dL/g     |
| Bulk CH3 / 1000C   | 86.59   |          |
| Bulk SCB / 1000C   | 84.51   |          |
| Bulk Comonomer Wt% | 67.61   | %        |
| Pump Flow Rate     | 1.00    | ml / min |
| Columns Temp       | 150     | °C       |
| Detectors Temp     | 150     | °C       |
| Nominal MHa        | 0.725   |          |
| Nominal MHK        | 0.00044 |          |

**Calibrations**

|               |       |         |
|---------------|-------|---------|
| Flow Marker   | 28.32 | mL      |
| Mass constant | 0.45  | mL·V/mg |

**Performance**

|               |       |    |
|---------------|-------|----|
| Flow Marker   | 28.48 | mL |
| Mass recovery | 96    | %  |
| Plate Count   | 14017 |    |

**Figure S74.** GPC trace of poly(E-co-A-ol) (Entry 4, Table 2).

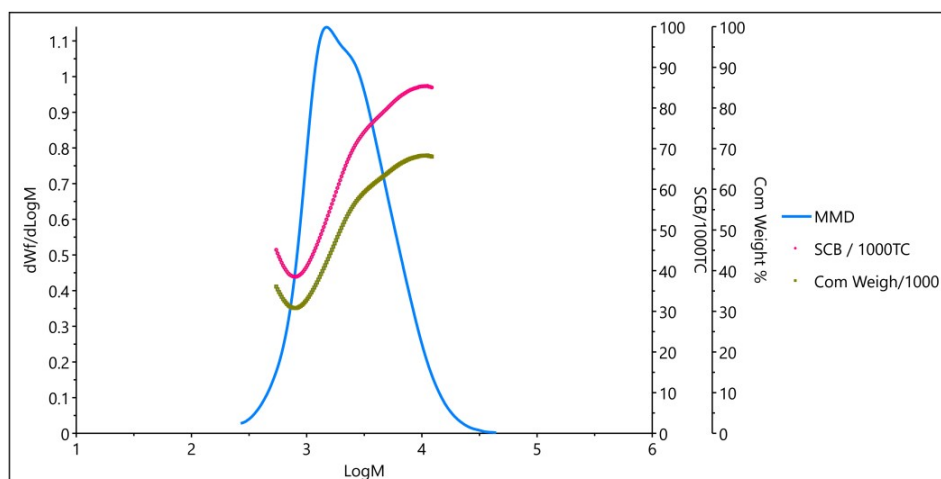

**Results**

|                    |         |          |
|--------------------|---------|----------|
| Mw                 | 3273    | g/mol    |
| Mn                 | 1745    | g/mol    |
| Mw / Mn            | 1.88    |          |
| Mz                 | 6479    | g/mol    |
| Mp                 | 1497    | g/mol    |
| Mv                 | 2978    | g/mol    |
| IVmwd              | 0.15    | dL/g     |
| Bulk CH3 / 1000C   | 80.09   |          |
| Bulk SCB / 1000C   | 63.94   |          |
| Bulk Comonomer Wt% | 51.15   | %        |
| Pump Flow Rate     | 1.00    | ml / min |
| Columns Temp       | 150     | °C       |
| Detectors Temp     | 150     | °C       |
| Nominal MHa        | 0.725   |          |
| Nominal MHK        | 0.00044 |          |

**Calibrations**

|               |       |         |
|---------------|-------|---------|
| Flow Marker   | 28.16 | mL      |
| Mass constant | 0.45  | mL·V/mg |

**Performance**

|               |       |    |
|---------------|-------|----|
| Flow Marker   | 28.16 | mL |
| Mass recovery | 81    | %  |
| Plate Count   | 14595 |    |

**Figure S75.** GPC trace of poly(E-co-A-ol) (Entry 5, Table 2).

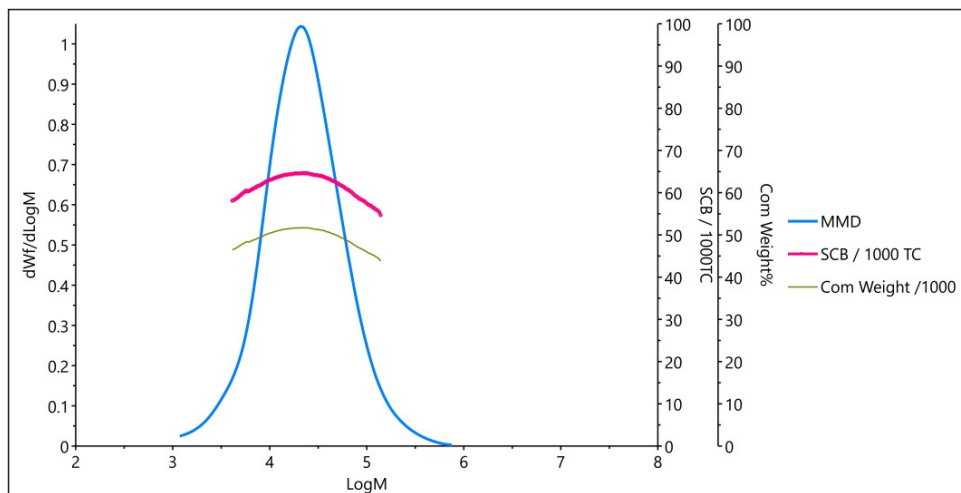

**Results**

|                            |        |                 |
|----------------------------|--------|-----------------|
| Mw                         | 35771  | g/mol           |
| Mn                         | 14128  | g/mol           |
| Mw / Mn                    | 2.53   |                 |
| Mz                         | 98855  | g/mol           |
| Mp                         | 21061  | g/mol           |
| Mv                         | 30767  | g/mol           |
| IVmwd                      | 0.6445 | dL/g            |
| Bulk CH3 / 1000C           | 63.878 |                 |
| Corrected Bulk CH3 / 1000C | 61.8   | CH3/1000TC corr |

**Calibrations**

|                     |       |         |
|---------------------|-------|---------|
| Calib Flow Marker   | 28.02 | mL      |
| Calib Mass constant | 0.28  | mL·V/mg |

**Performance**

|               |       |    |
|---------------|-------|----|
| Flow Marker   | 28.03 | mL |
| Mass recovery | 92    | %  |
| Plate Count   | 18093 |    |

**Figure S76.** GPC trace of poly(E-co-HAA) (Entry 7, Table 2) after acetylation.

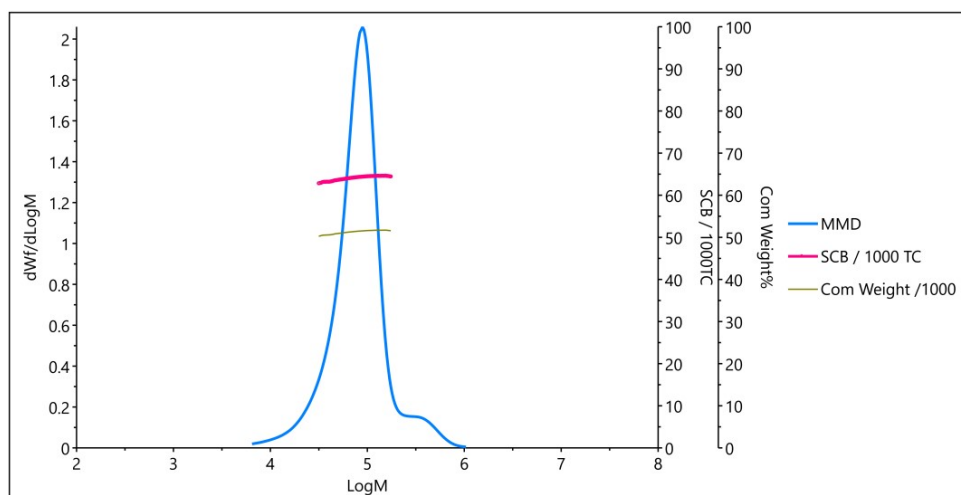

**Results**

|                            |        |                 |
|----------------------------|--------|-----------------|
| Mw                         | 101776 | g/mol           |
| Mn                         | 64161  | g/mol           |
| Mw / Mn                    | 1.59   |                 |
| Mz                         | 179467 | g/mol           |
| Mp                         | 88492  | g/mol           |
| Mv                         | 94442  | g/mol           |
| IVmwd                      | 1.4020 | dL/g            |
| Bulk CH3 / 1000C           | 64.156 |                 |
| Corrected Bulk CH3 / 1000C | 63.7   | CH3/1000TC corr |

**Calibrations**

|                     |       |         |
|---------------------|-------|---------|
| Calib Flow Marker   | 28.02 | mL      |
| Calib Mass constant | 0.28  | mL·V/mg |

**Performance**

|               |       |    |
|---------------|-------|----|
| Flow Marker   | 28.04 | mL |
| Mass recovery | 85    | %  |
| Plate Count   | 18211 |    |

**Figure S77.** GPC trace of poly(E-co-HAA) (Entry 8, Table 2) after acetylation.

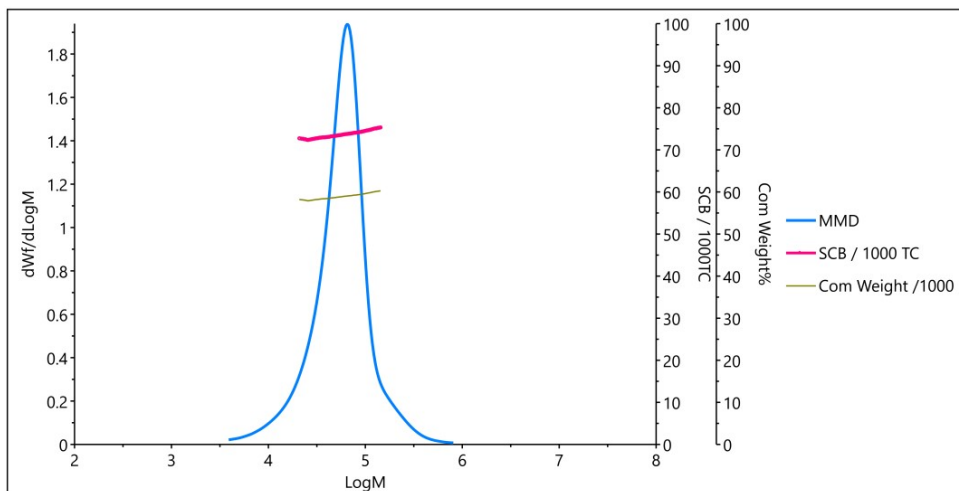

**Results**

|                            |        |                 |
|----------------------------|--------|-----------------|
| Mw                         | 70718  | g/mol           |
| Mn                         | 42941  | g/mol           |
| Mw / Mn                    | 1.65   |                 |
| Mz                         | 120354 | g/mol           |
| Mp                         | 65152  | g/mol           |
| Mv                         | 65821  | g/mol           |
| IVmwd                      | 1.0917 | dL/g            |
| Bulk CH3 / 1000C           | 74.106 |                 |
| Corrected Bulk CH3 / 1000C | 73.4   | CH3/1000TC corr |

**Calibrations**

|                     |       |         |
|---------------------|-------|---------|
| Calib Flow Marker   | 28.02 | mL      |
| Calib Mass constant | 0.28  | mL·V/mg |

**Performance**

|               |       |    |
|---------------|-------|----|
| Flow Marker   | 28.03 | mL |
| Mass recovery | 80    | %  |
| Plate Count   | 18048 |    |

**Figure S78.** GPC trace of poly(E-co-HAA) (Entry 9, Table 2) after acetylation.

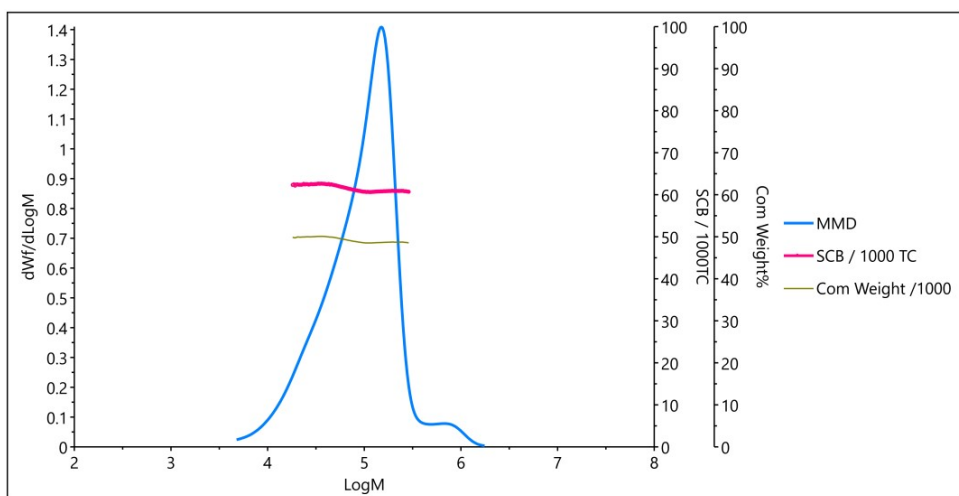

**Results**

|                            |        |                 |
|----------------------------|--------|-----------------|
| Mw                         | 130735 | g/mol           |
| Mn                         | 57031  | g/mol           |
| Mw / Mn                    | 2.29   |                 |
| Mz                         | 285773 | g/mol           |
| Mp                         | 149658 | g/mol           |
| Mv                         | 116662 | g/mol           |
| IVmwd                      | 1.6231 | dL/g            |
| Bulk CH3 / 1000C           | 61.398 |                 |
| Corrected Bulk CH3 / 1000C | 60.9   | CH3/1000TC corr |

**Calibrations**

|                     |       |         |
|---------------------|-------|---------|
| Calib Flow Marker   | 28.02 | mL      |
| Calib Mass constant | 0.28  | mL·V/mg |

**Performance**

|               |       |    |
|---------------|-------|----|
| Flow Marker   | 28.04 | mL |
| Mass recovery | 86    | %  |
| Plate Count   | 17935 |    |

**Figure S79.** GPC trace of poly(E-co-PA) (Entry 10, Table 2) after acetylation.

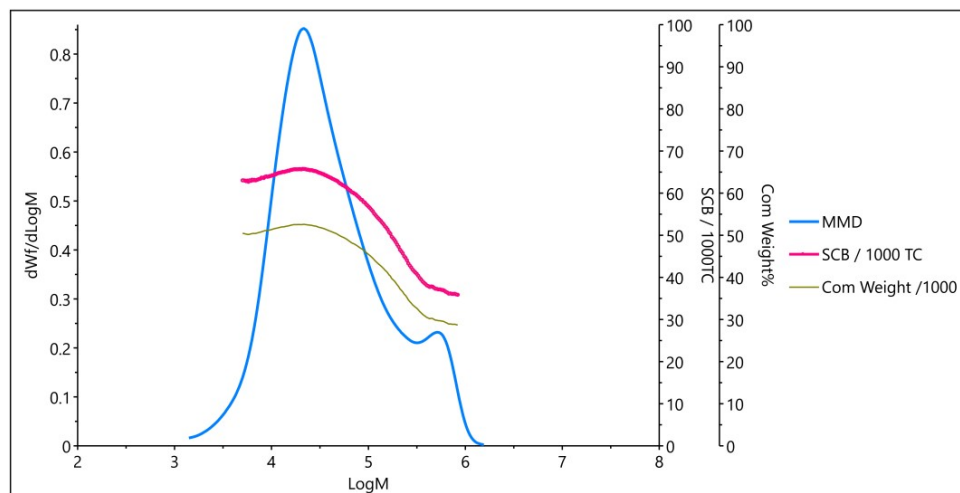

**Results**

|                            |        |                 |
|----------------------------|--------|-----------------|
| Mw                         | 100568 | g/mol           |
| Mn                         | 20086  | g/mol           |
| Mw / Mn                    | 5.01   |                 |
| Mz                         | 390161 | g/mol           |
| Mp                         | 21457  | g/mol           |
| Mv                         | 75945  | g/mol           |
| IVmwd                      | 1.2055 | dL/g            |
| Bulk CH3 / 1000C           | 60.933 |                 |
| Corrected Bulk CH3 / 1000C | 59.5   | CH3/1000TC corr |

**Calibrations**

|                     |       |         |
|---------------------|-------|---------|
| Calib Flow Marker   | 28.02 | mL      |
| Calib Mass constant | 0.28  | mL·V/mg |

**Performance**

|               |       |    |
|---------------|-------|----|
| Flow Marker   | 28.09 | mL |
| Mass recovery | 89    | %  |
| Plate Count   | 16751 |    |

**Figure S80(a).** GPC trace of poly(E-co-PA) (Entry 11, Table 2) after acetylation.

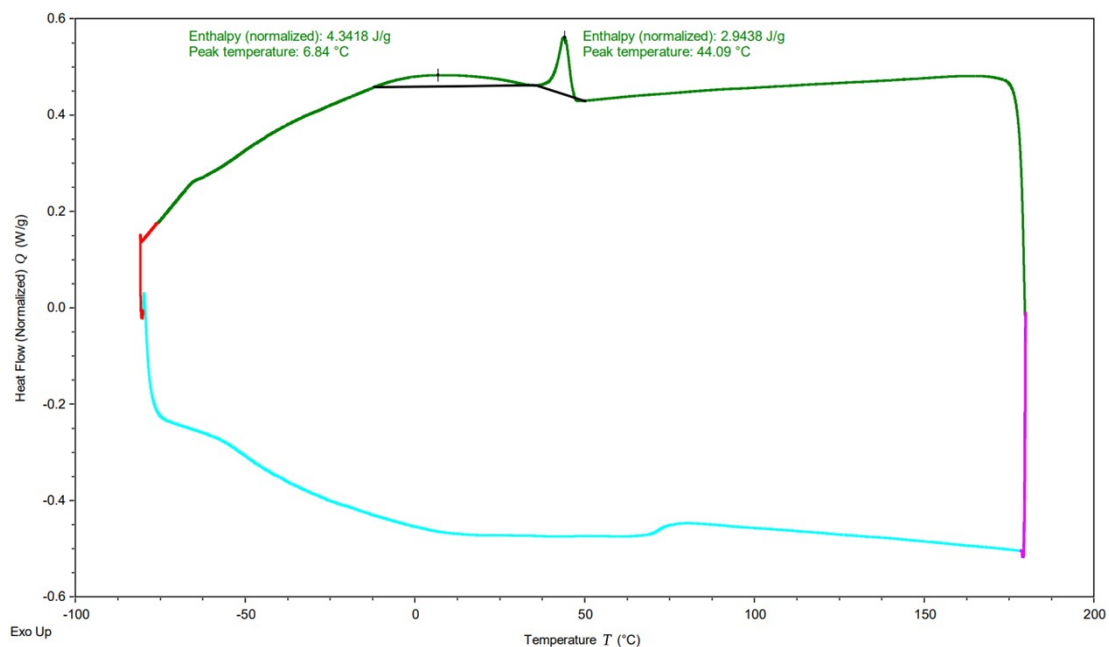

**Figure S80(b).** DSC trace of poly(E-co-PA) (Entry 11, Table 2)

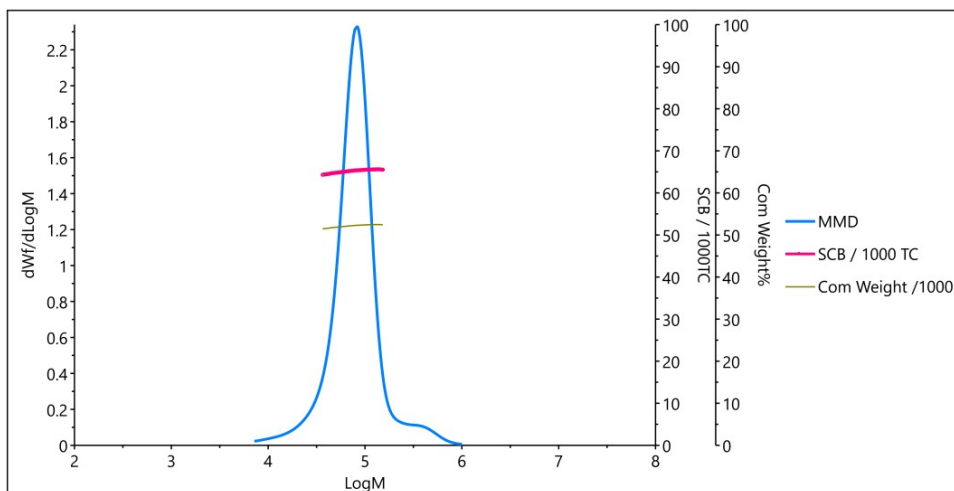

**Results**

|                            |        |                 |
|----------------------------|--------|-----------------|
| Mw                         | 95771  | g/mol           |
| Mn                         | 65187  | g/mol           |
| Mw / Mn                    | 1.47   |                 |
| Mz                         | 164677 | g/mol           |
| Mp                         | 82020  | g/mol           |
| Mv                         | 89666  | g/mol           |
| IVmwd                      | 1.3525 | dL/g            |
| Bulk CH3 / 1000C           | 65.266 |                 |
| Corrected Bulk CH3 / 1000C | 64.8   | CH3/1000TC corr |

**Calibrations**

|                     |       |         |
|---------------------|-------|---------|
| Calib Flow Marker   | 28.02 | mL      |
| Calib Mass constant | 0.28  | mL·V/mg |

**Performance**

|               |       |    |
|---------------|-------|----|
| Flow Marker   | 28.03 | mL |
| Mass recovery | 86    | %  |
| Plate Count   | 18041 |    |

**Figure S81.** GPC trace of poly(E-co-PA) (Entry 12, Table 2) after acetylation.

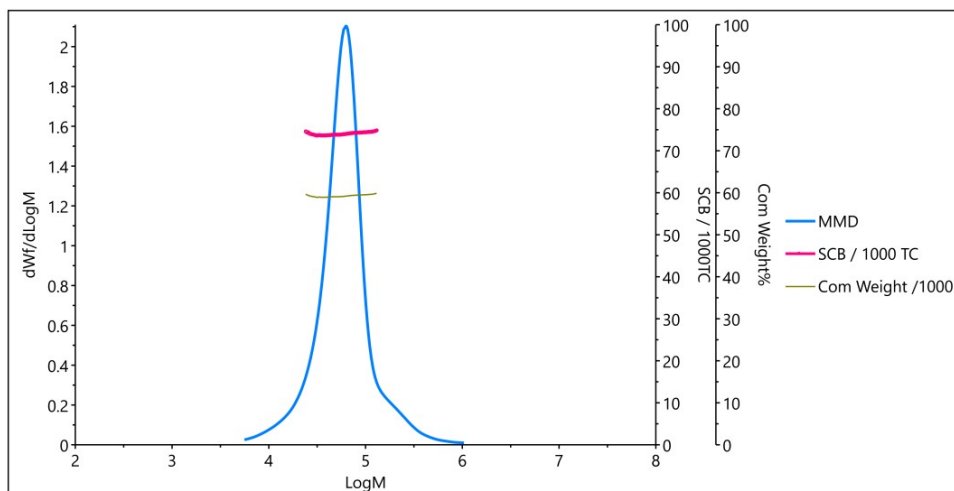

**Results**

|                            |        |                 |
|----------------------------|--------|-----------------|
| Mw                         | 74878  | g/mol           |
| Mn                         | 47062  | g/mol           |
| Mw / Mn                    | 1.59   |                 |
| Mz                         | 146441 | g/mol           |
| Mp                         | 62256  | g/mol           |
| Mv                         | 69068  | g/mol           |
| IVmwd                      | 1.1287 | dL/g            |
| Bulk CH3 / 1000C           | 74.984 |                 |
| Corrected Bulk CH3 / 1000C | 74.4   | CH3/1000TC corr |

**Calibrations**

|                     |       |         |
|---------------------|-------|---------|
| Calib Flow Marker   | 28.02 | mL      |
| Calib Mass constant | 0.28  | mL·V/mg |

**Performance**

|               |       |    |
|---------------|-------|----|
| Flow Marker   | 28.03 | mL |
| Mass recovery | 86    | %  |
| Plate Count   | 18089 |    |

**Figure S82.** GPC trace of poly(E-co-PA) (Entry 13, Table 2) after acetylation.



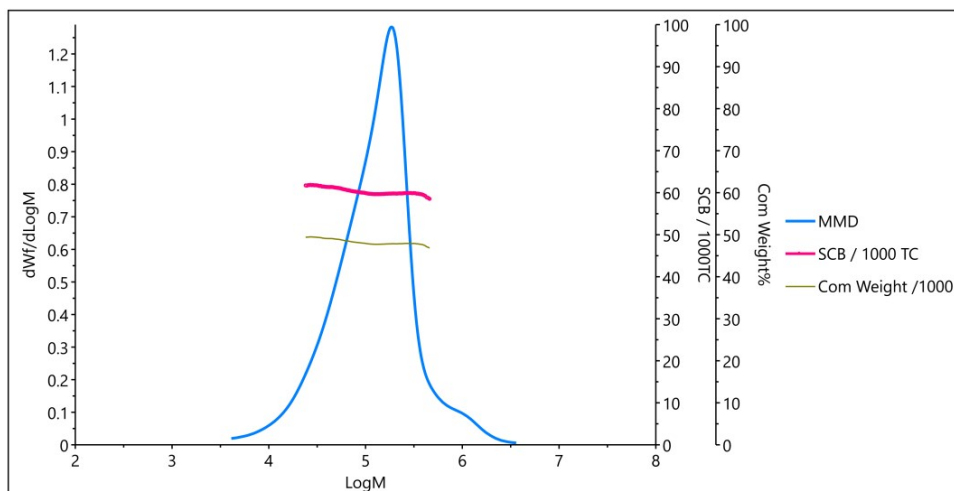

**Results**

|                            |        |                 |
|----------------------------|--------|-----------------|
| Mw                         | 193221 | g/mol           |
| Mn                         | 71031  | g/mol           |
| Mw / Mn                    | 2.72   |                 |
| Mz                         | 539926 | g/mol           |
| Mp                         | 184987 | g/mol           |
| Mv                         | 166760 | g/mol           |
| IVmwd                      | 2.0791 | dL/g            |
| Bulk CH3 / 1000C           | 60.200 |                 |
| Corrected Bulk CH3 / 1000C | 59.8   | CH3/1000TC corr |

**Calibrations**

|                     |       |         |
|---------------------|-------|---------|
| Calib Flow Marker   | 28.02 | mL      |
| Calib Mass constant | 0.28  | mL·V/mg |

**Performance**

|               |       |    |
|---------------|-------|----|
| Flow Marker   | 28.02 | mL |
| Mass recovery | 87    | %  |
| Plate Count   | 17750 |    |

**Figure S83.** GPC trace of poly(E-co-DA) (Entry 14, Table 2) after acetylation.

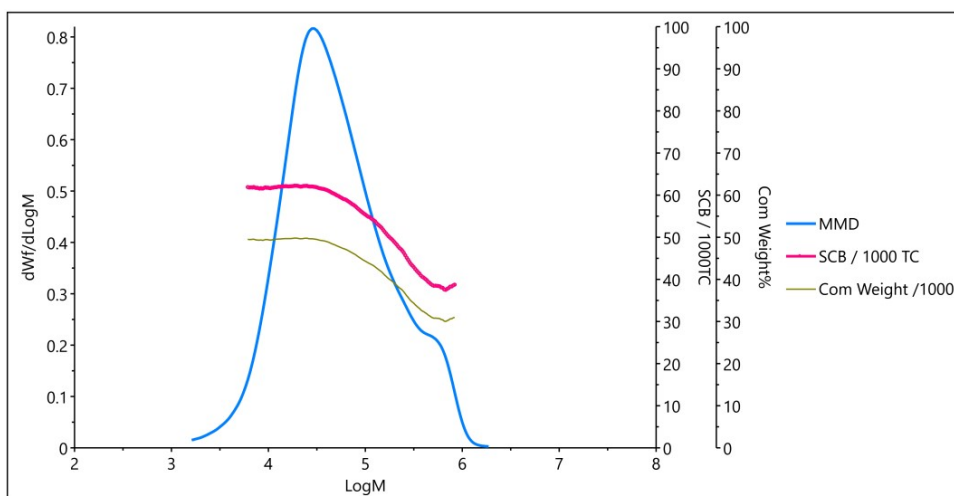

**Results**

|                            |        |                 |
|----------------------------|--------|-----------------|
| Mw                         | 110118 | g/mol           |
| Mn                         | 25727  | g/mol           |
| Mw / Mn                    | 4.28   |                 |
| Mz                         | 376230 | g/mol           |
| Mp                         | 29050  | g/mol           |
| Mv                         | 86737  | g/mol           |
| IVmwd                      | 1.3217 | dL/g            |
| Bulk CH3 / 1000C           | 58.103 |                 |
| Corrected Bulk CH3 / 1000C | 57.0   | CH3/1000TC corr |

**Calibrations**

|                     |       |         |
|---------------------|-------|---------|
| Calib Flow Marker   | 28.02 | mL      |
| Calib Mass constant | 0.28  | mL·V/mg |

**Performance**

|               |       |    |
|---------------|-------|----|
| Flow Marker   | 28.09 | mL |
| Mass recovery | 92    | %  |
| Plate Count   | 16976 |    |

**Figure S84(a).** GPC trace of poly(E-co-DA) (Entry 15, Table 2) after acetylation.

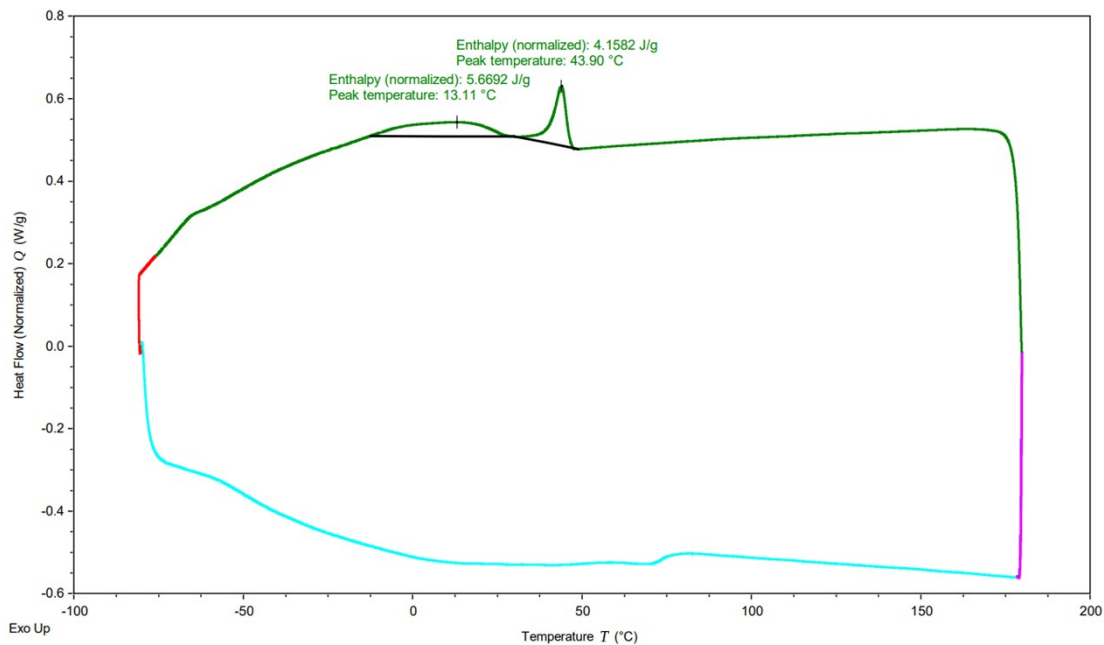

**Figure S84(b).** DSC trace of poly(E-co-DA) (Entry 15, Table 2)

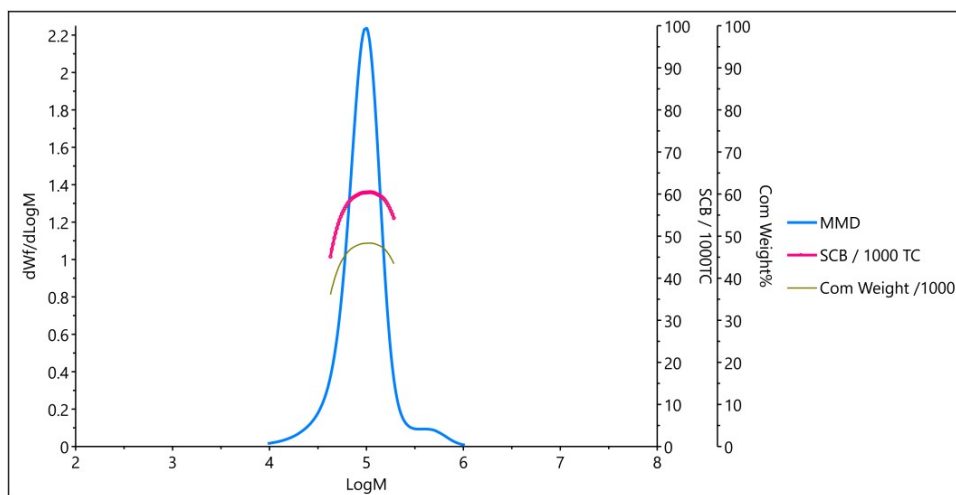

**Results**

|                            |        |                 |
|----------------------------|--------|-----------------|
| Mw                         | 112152 | g/mol           |
| Mn                         | 79538  | g/mol           |
| Mw / Mn                    | 1.41   |                 |
| Mz                         | 182265 | g/mol           |
| Mp                         | 98462  | g/mol           |
| Mv                         | 105715 | g/mol           |
| IVmwd                      | 1.5160 | dL/g            |
| Bulk CH3 / 1000C           | 48.913 |                 |
| Corrected Bulk CH3 / 1000C | 48.6   | CH3/1000TC corr |

**Calibrations**

|                     |       |         |
|---------------------|-------|---------|
| Calib Flow Marker   | 28.02 | mL      |
| Calib Mass constant | 0.28  | mL·V/mg |

**Performance**

|               |       |    |
|---------------|-------|----|
| Flow Marker   | 28.09 | mL |
| Mass recovery | 80    | %  |
| Plate Count   | 15959 |    |

**Figure S85.** GPC trace of poly(E-co-DA) (Entry 16, Table 2) after acetylation.

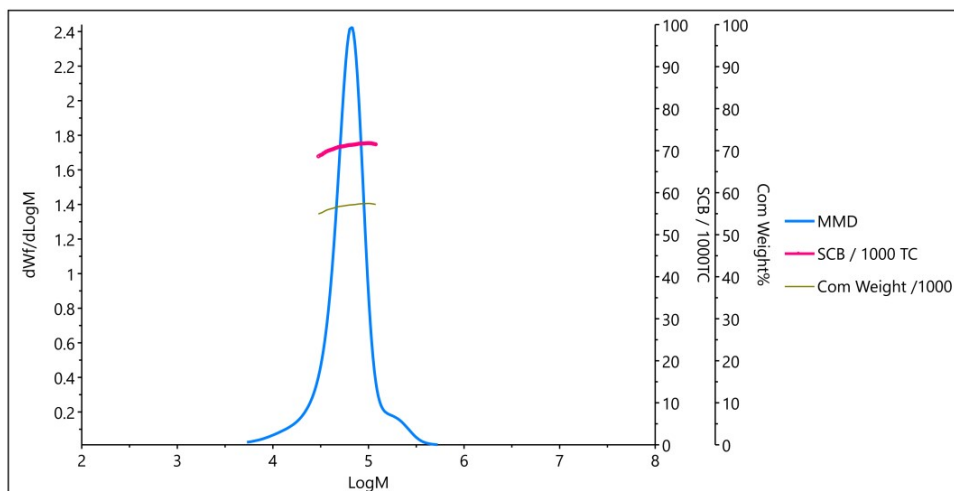

**Results**

|                            |        |                 |
|----------------------------|--------|-----------------|
| Mw                         | 70764  | g/mol           |
| Mn                         | 49704  | g/mol           |
| Mw / Mn                    | 1.42   |                 |
| Mz                         | 101335 | g/mol           |
| Mp                         | 65957  | g/mol           |
| Mv                         | 67355  | g/mol           |
| IVmwd                      | 1.1093 | dL/g            |
| Bulk CH3 / 1000C           | 70.434 |                 |
| Corrected Bulk CH3 / 1000C | 69.9   | CH3/1000TC corr |

**Calibrations**

|                     |       |         |
|---------------------|-------|---------|
| Calib Flow Marker   | 28.02 | mL      |
| Calib Mass constant | 0.28  | mL·V/mg |

**Performance**

|               |       |    |
|---------------|-------|----|
| Flow Marker   | 28.10 | mL |
| Mass recovery | 82    | %  |
| Plate Count   | 17138 |    |

**Figure S86.** GPC trace of poly(E-co-DA) (Entry 17, Table 2) after acetylation.

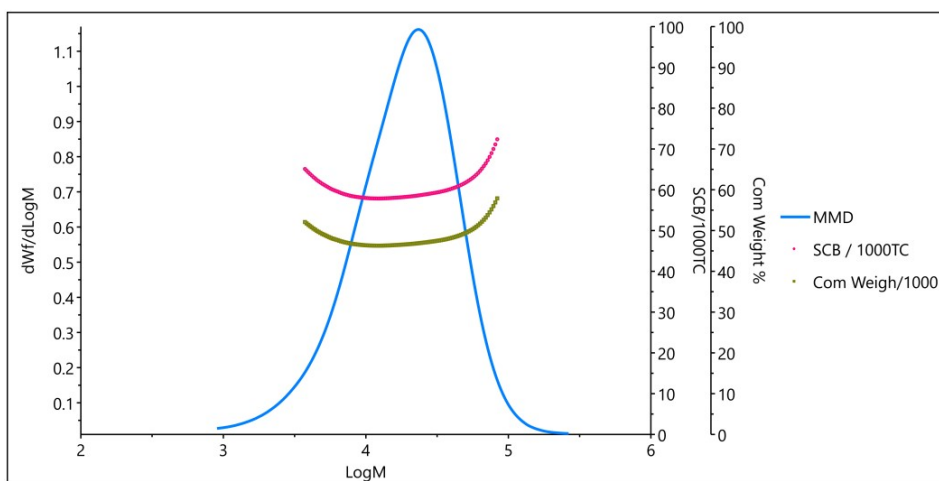

**Results**

|                    |         |          |
|--------------------|---------|----------|
| Mw                 | 25468   | g/mol    |
| Mn                 | 11881   | g/mol    |
| Mw / Mn            | 2.14    |          |
| Mz                 | 46256   | g/mol    |
| Mp                 | 23359   | g/mol    |
| Mv                 | 23358   | g/mol    |
| IVmwd              | 0.65    | dL/g     |
| Bulk CH3 / 1000C   | 64.23   |          |
| Bulk SCB / 1000C   | 61.80   |          |
| Bulk Comonomer Wt% | 49.44   | %        |
| Pump Flow Rate     | 1.00    | ml / min |
| Columns Temp       | 150     | °C       |
| Detectors Temp     | 150     | °C       |
| Nominal MHa        | 0.725   |          |
| Nominal MHK        | 0.00044 |          |

**Calibrations**

|               |       |         |
|---------------|-------|---------|
| Flow Marker   | 28.16 | mL      |
| Mass constant | 0.45  | mL·V/mg |

**Performance**

|               |       |    |
|---------------|-------|----|
| Flow Marker   | 28.10 | mL |
| Mass recovery | 99    | %  |
| Plate Count   | 3411  |    |

**Figure S87.** GPC trace of poly(E-co-AAc) (Entry 1, Table 4).

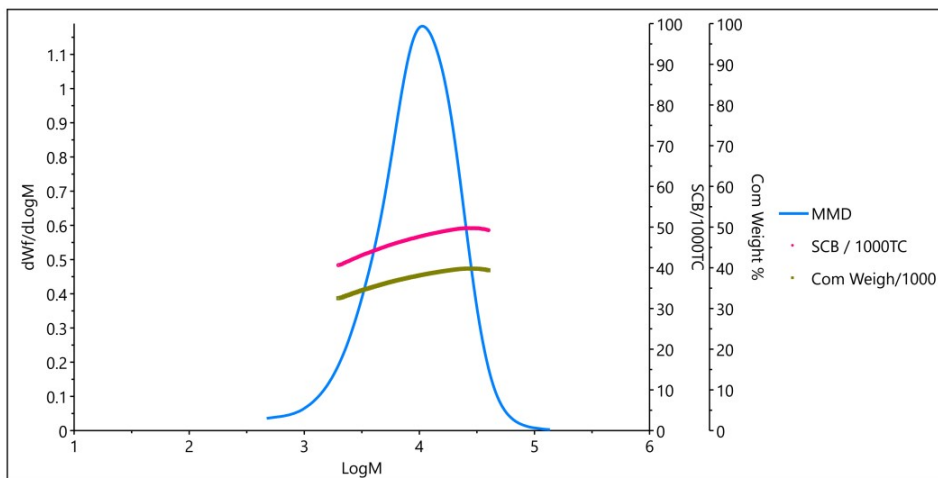

**Results**

|                    |         |          |
|--------------------|---------|----------|
| Mw                 | 12569   | g/mol    |
| Mn                 | 6070    | g/mol    |
| Mw / Mn            | 2.07    |          |
| Mz                 | 21227   | g/mol    |
| Mp                 | 10649   | g/mol    |
| Mv                 | 11617   | g/mol    |
| IVmwd              | 0.39    | dL/g     |
| Bulk CH3 / 1000C   | 51.68   |          |
| Bulk SCB / 1000C   | 46.98   |          |
| Bulk Comonomer Wt% | 37.58   | %        |
| Pump Flow Rate     | 1.00    | ml / min |
| Columns Temp       | 150     | °C       |
| Detectors Temp     | 150     | °C       |
| Nominal MHa        | 0.725   |          |
| Nominal MHK        | 0.00044 |          |

**Calibrations**

|               |       |         |
|---------------|-------|---------|
| Flow Marker   | 28.32 | mL      |
| Mass constant | 0.45  | mL·V/mg |

**Performance**

|               |       |    |
|---------------|-------|----|
| Flow Marker   | 28.30 | mL |
| Mass recovery | 95    | %  |
| Plate Count   | 3140  |    |

**Figure S88.** GPC trace of poly(E-co-AAc) (Entry 2, Table 4).

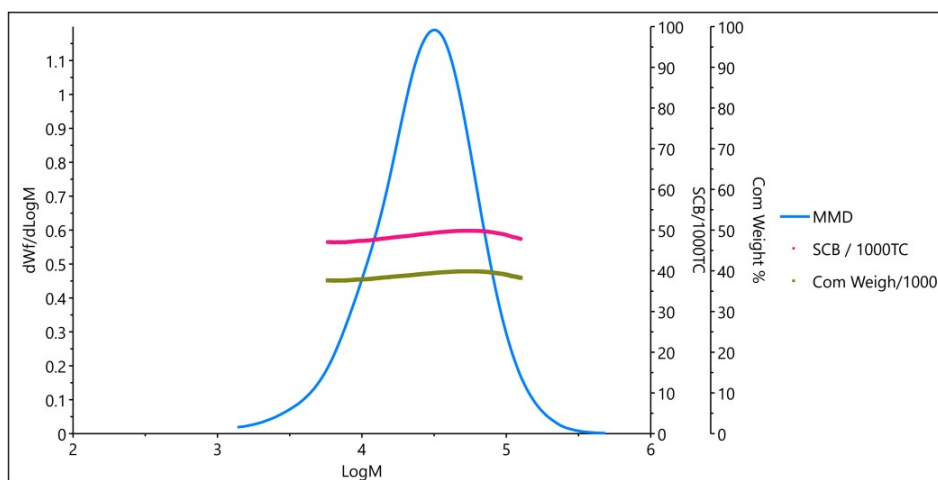

**Results**

|                    |         |          |
|--------------------|---------|----------|
| Mw                 | 37401   | g/mol    |
| Mn                 | 18158   | g/mol    |
| Mw / Mn            | 2.06    |          |
| Mz                 | 67002   | g/mol    |
| Mp                 | 31760   | g/mol    |
| Mv                 | 34364   | g/mol    |
| IVmwd              | 0.86    | dL/g     |
| Bulk CH3 / 1000C   | 50.33   |          |
| Bulk SCB / 1000C   | 48.73   |          |
| Bulk Comonomer Wt% | 38.99   | %        |
| Pump Flow Rate     | 1.00    | ml / min |
| Columns Temp       | 150     | °C       |
| Detectors Temp     | 150     | °C       |
| Nominal MHa        | 0.725   |          |
| Nominal MHK        | 0.00044 |          |

**Calibrations**

|               |       |         |
|---------------|-------|---------|
| Flow Marker   | 28.32 | mL      |
| Mass constant | 0.45  | mL·V/mg |

**Performance**

|               |       |    |
|---------------|-------|----|
| Flow Marker   | 28.32 | mL |
| Mass recovery | 96    | %  |
| Plate Count   | 2027  |    |

**Figure S89.** GPC trace of poly(E-co-AAc) (Entry 3, Table 4).

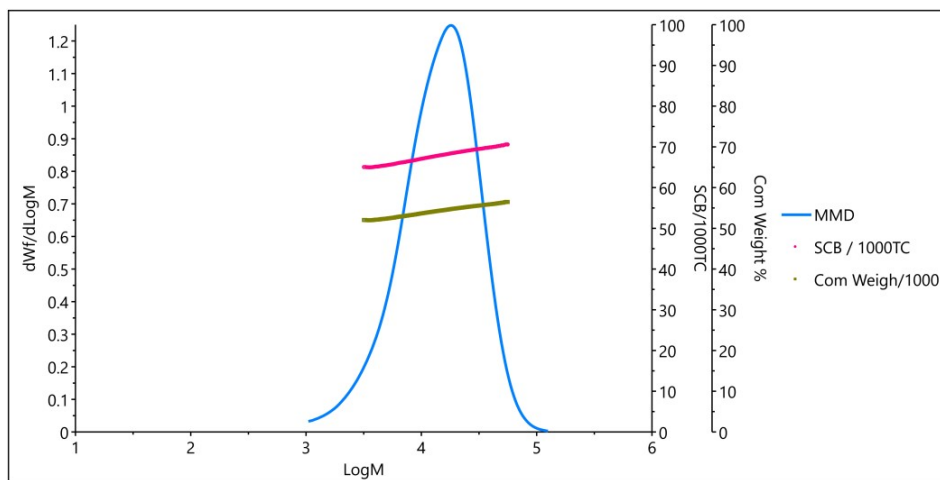

**Results**

|                    |         |          |
|--------------------|---------|----------|
| Mw                 | 18019   | g/mol    |
| Mn                 | 9962    | g/mol    |
| Mw / Mn            | 1.81    |          |
| Mz                 | 27510   | g/mol    |
| Mp                 | 18038   | g/mol    |
| Mv                 | 16868   | g/mol    |
| IVmwd              | 0.51    | dL/g     |
| Bulk CH3 / 1000C   | 70.70   |          |
| Bulk SCB / 1000C   | 67.83   |          |
| Bulk Comonomer Wt% | 54.26   | %        |
| Pump Flow Rate     | 1.00    | ml / min |
| Columns Temp       | 150     | °C       |
| Detectors Temp     | 150     | °C       |
| Nominal MHa        | 0.725   |          |
| Nominal MHK        | 0.00044 |          |

**Calibrations**

|               |       |         |
|---------------|-------|---------|
| Flow Marker   | 28.32 | mL      |
| Mass constant | 0.45  | mL·V/mg |

**Performance**

|               |       |    |
|---------------|-------|----|
| Flow Marker   | 27.88 | mL |
| Mass recovery | 96    | %  |
| Plate Count   | 3794  |    |

**Figure S90.** GPC trace of poly(E-co-AAc) (Entry 4, Table 4).

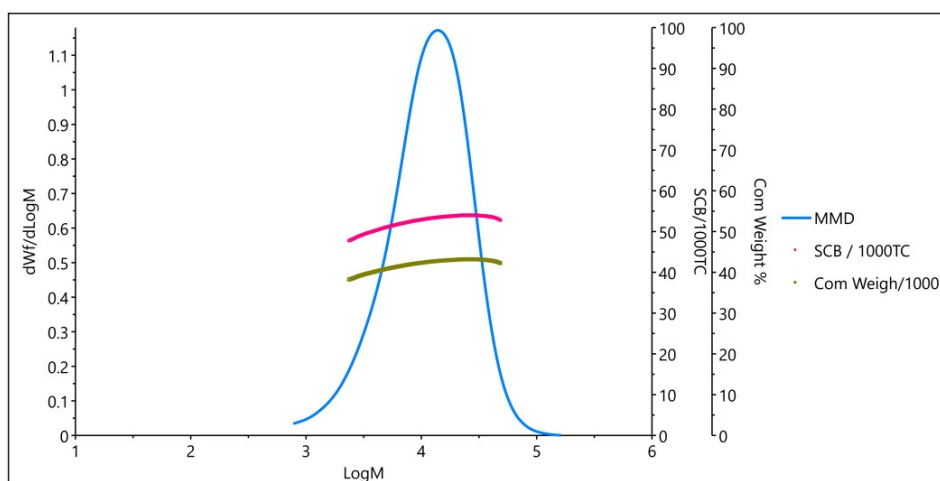

**Results**

|                    |         |          |
|--------------------|---------|----------|
| Mw                 | 15258   | g/mol    |
| Mn                 | 7838    | g/mol    |
| Mw / Mn            | 1.95    |          |
| Mz                 | 24957   | g/mol    |
| Mp                 | 13886   | g/mol    |
| Mv                 | 14156   | g/mol    |
| IVmwd              | 0.45    | dL/g     |
| Bulk CH3 / 1000C   | 56.00   |          |
| Bulk SCB / 1000C   | 52.35   |          |
| Bulk Comonomer Wt% | 41.88   | %        |
| Pump Flow Rate     | 1.00    | ml / min |
| Columns Temp       | 150     | °C       |
| Detectors Temp     | 150     | °C       |
| Nominal MHa        | 0.725   |          |
| Nominal MHK        | 0.00044 |          |

**Calibrations**

|               |       |         |
|---------------|-------|---------|
| Flow Marker   | 28.16 | mL      |
| Mass constant | 0.45  | mL·V/mg |

**Performance**

|               |       |    |
|---------------|-------|----|
| Flow Marker   | 28.16 | mL |
| Mass recovery | 96    | %  |
| Plate Count   | 14676 |    |

**Figure S91.** GPC trace of poly(E-co-AAc) (Entry 5, Table 4).

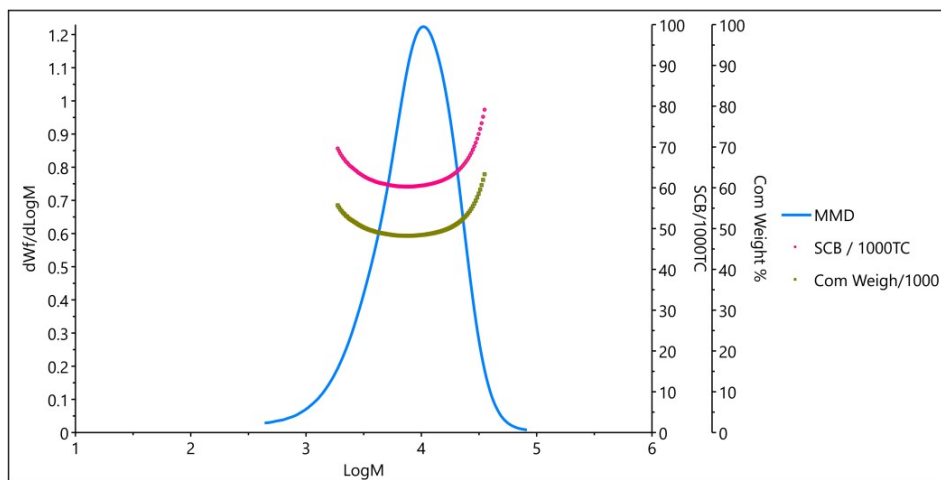

**Results**

|                    |         |          |
|--------------------|---------|----------|
| Mw                 | 11471   | g/mol    |
| Mn                 | 5768    | g/mol    |
| Mw / Mn            | 1.99    |          |
| Mz                 | 18074   | g/mol    |
| Mp                 | 10427   | g/mol    |
| Mv                 | 10680   | g/mol    |
| IVmwd              | 0.37    | dL/g     |
| Bulk CH3 / 1000C   | 70.49   |          |
| Bulk SCB / 1000C   | 65.55   |          |
| Bulk Comonomer Wt% | 52.44   | %        |
| Pump Flow Rate     | 1.00    | ml / min |
| Columns Temp       | 150     | °C       |
| Detectors Temp     | 150     | °C       |
| Nominal MHa        | 0.725   |          |
| Nominal MHK        | 0.00044 |          |

**Calibrations**

|               |       |         |
|---------------|-------|---------|
| Flow Marker   | 28.32 | mL      |
| Mass constant | 0.45  | mL·V/mg |

**Performance**

|               |       |    |
|---------------|-------|----|
| Flow Marker   | 28.35 | mL |
| Mass recovery | 95    | %  |
| Plate Count   | 2368  |    |

**Figure S92.** GPC trace of poly(E-co-AAc) (Entry 6, Table 4).

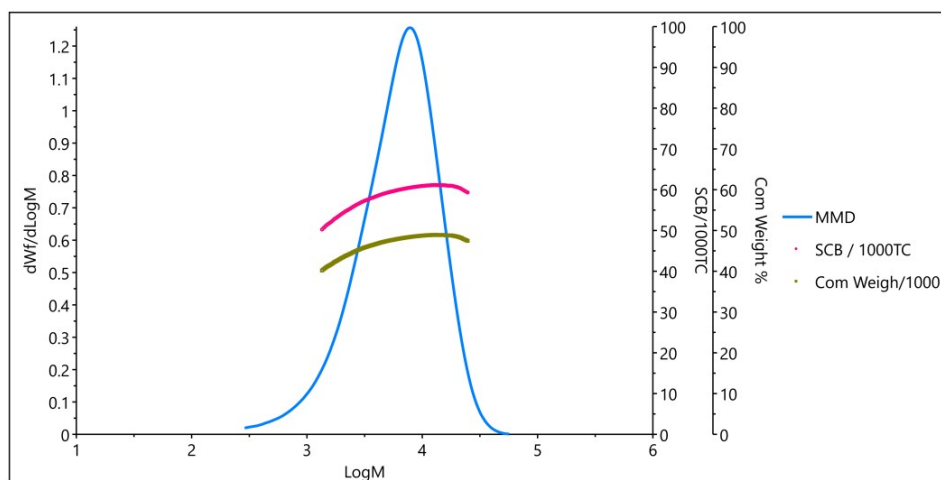

**Results**

|                    |         |          |
|--------------------|---------|----------|
| Mw                 | 7950    | g/mol    |
| Mn                 | 4046    | g/mol    |
| Mw / Mn            | 1.97    |          |
| Mz                 | 12274   | g/mol    |
| Mp                 | 7824    | g/mol    |
| Mv                 | 7416    | g/mol    |
| IVmwd              | 0.28    | dL/g     |
| Bulk CH3 / 1000C   | 65.35   |          |
| Bulk SCB / 1000C   | 58.34   |          |
| Bulk Comonomer Wt% | 46.67   | %        |
| Pump Flow Rate     | 1.00    | ml / min |
| Columns Temp       | 150     | °C       |
| Detectors Temp     | 150     | °C       |
| Nominal MHa        | 0.725   |          |
| Nominal MHK        | 0.00044 |          |

**Calibrations**

|               |       |         |
|---------------|-------|---------|
| Flow Marker   | 28.32 | mL      |
| Mass constant | 0.45  | mL·V/mg |

**Performance**

|               |       |    |
|---------------|-------|----|
| Flow Marker   | 28.34 | mL |
| Mass recovery | 97    | %  |
| Plate Count   | 4500  |    |

**Figure S93.** GPC trace of poly(E-co-AAc) (Entry 7, Table 4).

## 7. X-ray Crystallography

Table S1. Crystal data and structure refinement for **4c**

|                                   |                                                                                               |
|-----------------------------------|-----------------------------------------------------------------------------------------------|
| Identification code               | mo_d8v18750_0m                                                                                |
| Empirical formula                 | C <sub>39</sub> H <sub>61</sub> Br <sub>3</sub> N <sub>2</sub> Ni <sub>2</sub> O <sub>3</sub> |
| Formula weight                    | 963.04                                                                                        |
| Temperature                       | 296(2) K                                                                                      |
| Wavelength                        | 0.71073 Å                                                                                     |
| Crystal system                    | Monoclinic                                                                                    |
| Space group                       | P 21/c                                                                                        |
| Unit cell dimensions              | a = 14.9658(9) Å                                                                              |
|                                   | b = 19.0661(9) Å                                                                              |
|                                   | c = 16.9642(9) Å                                                                              |
| Volume                            | 4786.8(4) Å <sup>3</sup>                                                                      |
| Z                                 | 4                                                                                             |
| Density (calculated)              | 1.336 Mg/m <sup>3</sup>                                                                       |
| Absorption coefficient            | 3.323 mm <sup>-1</sup>                                                                        |
| F(000)                            | 1976                                                                                          |
| Crystal size                      | 0.200 x 0.170 x 0.130 mm <sup>3</sup>                                                         |
| Theta range for data collection   | 2.541 to 26.000°.                                                                             |
| Index ranges                      | -15 ≤ h ≤ 18, -23 ≤ k ≤ 23, -17 ≤ l ≤ 20                                                      |
| Reflections collected             | 23698                                                                                         |
| Independent reflections           | 9366 [R(int) = 0.0416]                                                                        |
| Completeness to theta = 25.242°   | 99.6 %                                                                                        |
| Absorption correction             | Semi-empirical from equivalents                                                               |
| Max. and min. transmission        | 0.7456 and 0.5430                                                                             |
| Refinement method                 | Full-matrix least-squares on F <sup>2</sup>                                                   |
| Data / restraints / parameters    | 9366 / 0 / 454                                                                                |
| Goodness-of-fit on F <sup>2</sup> | 0.975                                                                                         |
| Final R indices [I > 2σ(I)]       | R1 = 0.0453, wR2 = 0.1112                                                                     |
| R indices (all data)              | R1 = 0.0793, wR2 = 0.1222                                                                     |
| Extinction coefficient            | 0.0026(3)                                                                                     |
| Largest diff. peak and hole       | 0.820 and -0.535 e.Å <sup>-3</sup>                                                            |

Table S2. Bond lengths [Å] for **4c**

|             |           |              |          |
|-------------|-----------|--------------|----------|
| Ni(1)-O(1)  | 1.988(3)  | C(17)-H(17)  | 0.9800   |
| Ni(1)-N(1)  | 2.031(3)  | C(18)-H(18A) | 0.9600   |
| Ni(1)-O(2)  | 2.093(3)  | C(18)-H(18B) | 0.9600   |
| Ni(1)-Br(1) | 2.4350(6) | C(18)-H(18C) | 0.9600   |
| Ni(1)-Br(2) | 2.5959(6) | C(19)-H(19A) | 0.9600   |
| Ni(2)-O(1)  | 1.979(2)  | C(19)-H(19B) | 0.9600   |
| Ni(2)-N(2)  | 2.054(3)  | C(19)-H(19C) | 0.9600   |
| Ni(2)-O(3)  | 2.106(3)  | C(20)-C(25)  | 1.386(6) |
| Ni(2)-Br(3) | 2.4058(7) | C(20)-C(21)  | 1.397(6) |
| Ni(2)-Br(2) | 2.4609(7) | C(21)-C(22)  | 1.389(6) |
| N(1)-C(1)   | 1.286(5)  | C(21)-C(29)  | 1.545(7) |
| N(1)-C(8)   | 1.456(5)  | C(22)-C(23)  | 1.373(7) |

|              |          |              |          |
|--------------|----------|--------------|----------|
| N(2)-C(3)    | 1.283(5) | C(22)-H(22)  | 0.9300   |
| N(2)-C(20)   | 1.445(5) | C(23)-C(24)  | 1.353(7) |
| O(1)-C(2)    | 1.396(4) | C(23)-H(23)  | 0.9300   |
| O(2)-C(35)   | 1.433(6) | C(24)-C(25)  | 1.395(6) |
| O(2)-C(32)   | 1.452(6) | C(24)-H(24)  | 0.9300   |
| O(3)-C(39)   | 1.440(5) | C(25)-C(26)  | 1.508(7) |
| O(3)-C(36)   | 1.446(5) | C(26)-C(27)  | 1.518(8) |
| C(1)-C(5)    | 1.514(6) | C(26)-C(28)  | 1.519(9) |
| C(1)-C(2)    | 1.537(6) | C(26)-H(26)  | 0.9800   |
| C(2)-C(3)    | 1.518(6) | C(27)-H(27A) | 0.9600   |
| C(2)-C(6)    | 1.561(5) | C(27)-H(27B) | 0.9600   |
| C(3)-C(4)    | 1.509(6) | C(27)-H(27C) | 0.9600   |
| C(4)-H(4A)   | 0.9600   | C(28)-H(28A) | 0.9600   |
| C(4)-H(4B)   | 0.9600   | C(28)-H(28B) | 0.9600   |
| C(4)-H(4C)   | 0.9600   | C(28)-H(28C) | 0.9600   |
| C(5)-H(5A)   | 0.9600   | C(29)-C(31)  | 1.503(7) |
| C(5)-H(5B)   | 0.9600   | C(29)-C(30)  | 1.521(7) |
| C(5)-H(5C)   | 0.9600   | C(29)-H(29)  | 0.9800   |
| C(6)-C(7)    | 1.500(6) | C(30)-H(30A) | 0.9600   |
| C(6)-H(6A)   | 0.9700   | C(30)-H(30B) | 0.9600   |
| C(6)-H(6B)   | 0.9700   | C(30)-H(30C) | 0.9600   |
| C(7)-H(7A)   | 0.9600   | C(31)-H(31A) | 0.9600   |
| C(7)-H(7B)   | 0.9600   | C(31)-H(31B) | 0.9600   |
| C(7)-H(7C)   | 0.9600   | C(31)-H(31C) | 0.9600   |
| C(8)-C(13)   | 1.390(6) | C(32)-C(33)  | 1.507(8) |
| C(8)-C(9)    | 1.399(6) | C(32)-H(32A) | 0.9700   |
| C(9)-C(10)   | 1.389(6) | C(32)-H(32B) | 0.9700   |
| C(9)-C(17)   | 1.527(7) | C(33)-C(34)  | 1.428(9) |
| C(10)-C(11)  | 1.370(8) | C(33)-H(33A) | 0.9700   |
| C(10)-H(10)  | 0.9300   | C(33)-H(33B) | 0.9700   |
| C(11)-C(12)  | 1.340(8) | C(34)-C(35)  | 1.477(8) |
| C(11)-H(11)  | 0.9300   | C(34)-H(34A) | 0.9700   |
| C(12)-C(13)  | 1.403(7) | C(34)-H(34B) | 0.9700   |
| C(12)-H(12)  | 0.9300   | C(35)-H(35A) | 0.9700   |
| C(13)-C(14)  | 1.509(7) | C(35)-H(35B) | 0.9700   |
| C(14)-C(16)  | 1.507(7) | C(36)-C(37)  | 1.464(7) |
| C(14)-C(15)  | 1.546(8) | C(36)-H(36A) | 0.9700   |
| C(14)-H(14)  | 0.9800   | C(36)-H(36B) | 0.9700   |
| C(15)-H(15A) | 0.9600   | C(37)-C(38)  | 1.482(8) |
| C(15)-H(15B) | 0.9600   | C(37)-H(37A) | 0.9700   |
| C(15)-H(15C) | 0.9600   | C(37)-H(37B) | 0.9700   |
| C(16)-H(16A) | 0.9600   | C(38)-C(39)  | 1.490(7) |
| C(16)-H(16B) | 0.9600   | C(38)-H(38A) | 0.9700   |
| C(16)-H(16C) | 0.9600   | C(38)-H(38B) | 0.9700   |
| C(17)-C(19)  | 1.514(7) | C(39)-H(39A) | 0.9700   |
| C(17)-C(18)  | 1.542(7) | C(39)-H(39B) | 0.9700   |



Table S3. Bond angles [°] for **4c**

|                   |            |                     |          |
|-------------------|------------|---------------------|----------|
| O(1)-Ni(1)-N(1)   | 81.74(12)  | C(17)-C(18)-H(18A)  | 109.5    |
| O(1)-Ni(1)-O(2)   | 170.52(11) | C(17)-C(18)-H(18B)  | 109.5    |
| N(1)-Ni(1)-O(2)   | 100.29(13) | H(18A)-C(18)-H(18B) | 109.5    |
| O(1)-Ni(1)-Br(1)  | 96.05(7)   | C(17)-C(18)-H(18C)  | 109.5    |
| N(1)-Ni(1)-Br(1)  | 113.36(9)  | H(18A)-C(18)-H(18C) | 109.5    |
| O(2)-Ni(1)-Br(1)  | 91.64(9)   | H(18B)-C(18)-H(18C) | 109.5    |
| O(1)-Ni(1)-Br(2)  | 83.91(7)   | C(17)-C(19)-H(19A)  | 109.5    |
| N(1)-Ni(1)-Br(2)  | 97.27(9)   | C(17)-C(19)-H(19B)  | 109.5    |
| O(2)-Ni(1)-Br(2)  | 86.64(9)   | H(19A)-C(19)-H(19B) | 109.5    |
| Br(1)-Ni(1)-Br(2) | 149.10(3)  | C(17)-C(19)-H(19C)  | 109.5    |
| O(1)-Ni(2)-N(2)   | 79.45(11)  | H(19A)-C(19)-H(19C) | 109.5    |
| O(1)-Ni(2)-O(3)   | 83.53(10)  | H(19B)-C(19)-H(19C) | 109.5    |
| N(2)-Ni(2)-O(3)   | 154.10(12) | C(25)-C(20)-C(21)   | 122.6(4) |
| O(1)-Ni(2)-Br(3)  | 165.73(8)  | C(25)-C(20)-N(2)    | 117.6(4) |
| N(2)-Ni(2)-Br(3)  | 99.32(9)   | C(21)-C(20)-N(2)    | 119.8(4) |
| O(3)-Ni(2)-Br(3)  | 92.42(8)   | C(22)-C(21)-C(20)   | 117.4(5) |
| O(1)-Ni(2)-Br(2)  | 87.79(8)   | C(22)-C(21)-C(29)   | 119.2(4) |
| N(2)-Ni(2)-Br(2)  | 109.64(9)  | C(20)-C(21)-C(29)   | 123.3(4) |
| O(3)-Ni(2)-Br(2)  | 88.91(9)   | C(23)-C(22)-C(21)   | 121.1(5) |
| Br(3)-Ni(2)-Br(2) | 105.85(3)  | C(23)-C(22)-H(22)   | 119.5    |
| Ni(2)-Br(2)-Ni(1) | 75.60(2)   | C(21)-C(22)-H(22)   | 119.5    |
| C(1)-N(1)-C(8)    | 120.8(3)   | C(24)-C(23)-C(22)   | 119.9(5) |
| C(1)-N(1)-Ni(1)   | 114.1(3)   | C(24)-C(23)-H(23)   | 120.1    |
| C(8)-N(1)-Ni(1)   | 125.1(3)   | C(22)-C(23)-H(23)   | 120.1    |
| C(3)-N(2)-C(20)   | 119.3(3)   | C(23)-C(24)-C(25)   | 122.4(5) |
| C(3)-N(2)-Ni(2)   | 115.4(3)   | C(23)-C(24)-H(24)   | 118.8    |
| C(20)-N(2)-Ni(2)  | 125.3(3)   | C(25)-C(24)-H(24)   | 118.8    |
| C(2)-O(1)-Ni(2)   | 117.4(2)   | C(20)-C(25)-C(24)   | 116.5(5) |
| C(2)-O(1)-Ni(1)   | 115.3(2)   | C(20)-C(25)-C(26)   | 122.9(4) |
| Ni(2)-O(1)-Ni(1)  | 102.88(11) | C(24)-C(25)-C(26)   | 120.6(4) |
| C(35)-O(2)-C(32)  | 108.9(4)   | C(25)-C(26)-C(27)   | 112.1(5) |
| C(35)-O(2)-Ni(1)  | 117.9(3)   | C(25)-C(26)-C(28)   | 110.2(5) |
| C(32)-O(2)-Ni(1)  | 122.0(3)   | C(27)-C(26)-C(28)   | 112.9(5) |
| C(39)-O(3)-C(36)  | 109.0(3)   | C(25)-C(26)-H(26)   | 107.1    |
| C(39)-O(3)-Ni(2)  | 112.0(3)   | C(27)-C(26)-H(26)   | 107.1    |
| C(36)-O(3)-Ni(2)  | 124.5(3)   | C(28)-C(26)-H(26)   | 107.1    |
| N(1)-C(1)-C(5)    | 122.4(4)   | C(26)-C(27)-H(27A)  | 109.5    |
| N(1)-C(1)-C(2)    | 117.3(3)   | C(26)-C(27)-H(27B)  | 109.5    |
| C(5)-C(1)-C(2)    | 120.3(4)   | H(27A)-C(27)-H(27B) | 109.5    |
| O(1)-C(2)-C(3)    | 109.3(3)   | C(26)-C(27)-H(27C)  | 109.5    |
| O(1)-C(2)-C(1)    | 110.2(3)   | H(27A)-C(27)-H(27C) | 109.5    |
| C(3)-C(2)-C(1)    | 112.8(3)   | H(27B)-C(27)-H(27C) | 109.5    |
| O(1)-C(2)-C(6)    | 107.8(3)   | C(26)-C(28)-H(28A)  | 109.5    |
| C(3)-C(2)-C(6)    | 111.7(3)   | C(26)-C(28)-H(28B)  | 109.5    |
| C(1)-C(2)-C(6)    | 105.0(3)   | H(28A)-C(28)-H(28B) | 109.5    |

|                   |          |                     |          |
|-------------------|----------|---------------------|----------|
| N(2)-C(3)-C(4)    | 121.2(4) | C(26)-C(28)-H(28C)  | 109.5    |
| N(2)-C(3)-C(2)    | 117.0(3) | H(28A)-C(28)-H(28C) | 109.5    |
| C(4)-C(3)-C(2)    | 121.7(4) | H(28B)-C(28)-H(28C) | 109.5    |
| C(3)-C(4)-H(4A)   | 109.5    | C(31)-C(29)-C(30)   | 110.6(5) |
| C(3)-C(4)-H(4B)   | 109.5    | C(31)-C(29)-C(21)   | 112.9(4) |
| H(4A)-C(4)-H(4B)  | 109.5    | C(30)-C(29)-C(21)   | 110.7(5) |
| C(3)-C(4)-H(4C)   | 109.5    | C(31)-C(29)-H(29)   | 107.5    |
| H(4A)-C(4)-H(4C)  | 109.5    | C(30)-C(29)-H(29)   | 107.5    |
| H(4B)-C(4)-H(4C)  | 109.5    | C(21)-C(29)-H(29)   | 107.5    |
| C(1)-C(5)-H(5A)   | 109.5    | C(29)-C(30)-H(30A)  | 109.5    |
| C(1)-C(5)-H(5B)   | 109.5    | C(29)-C(30)-H(30B)  | 109.5    |
| H(5A)-C(5)-H(5B)  | 109.5    | H(30A)-C(30)-H(30B) | 109.5    |
| C(1)-C(5)-H(5C)   | 109.5    | C(29)-C(30)-H(30C)  | 109.5    |
| H(5A)-C(5)-H(5C)  | 109.5    | H(30A)-C(30)-H(30C) | 109.5    |
| H(5B)-C(5)-H(5C)  | 109.5    | H(30B)-C(30)-H(30C) | 109.5    |
| C(7)-C(6)-C(2)    | 112.1(4) | C(29)-C(31)-H(31A)  | 109.5    |
| C(7)-C(6)-H(6A)   | 109.2    | C(29)-C(31)-H(31B)  | 109.5    |
| C(2)-C(6)-H(6A)   | 109.2    | H(31A)-C(31)-H(31B) | 109.5    |
| C(7)-C(6)-H(6B)   | 109.2    | C(29)-C(31)-H(31C)  | 109.5    |
| C(2)-C(6)-H(6B)   | 109.2    | H(31A)-C(31)-H(31C) | 109.5    |
| H(6A)-C(6)-H(6B)  | 107.9    | H(31B)-C(31)-H(31C) | 109.5    |
| C(6)-C(7)-H(7A)   | 109.5    | O(2)-C(32)-C(33)    | 104.9(5) |
| C(6)-C(7)-H(7B)   | 109.5    | O(2)-C(32)-H(32A)   | 110.8    |
| H(7A)-C(7)-H(7B)  | 109.5    | C(33)-C(32)-H(32A)  | 110.8    |
| C(6)-C(7)-H(7C)   | 109.5    | O(2)-C(32)-H(32B)   | 110.8    |
| H(7A)-C(7)-H(7C)  | 109.5    | C(33)-C(32)-H(32B)  | 110.8    |
| H(7B)-C(7)-H(7C)  | 109.5    | H(32A)-C(32)-H(32B) | 108.8    |
| C(13)-C(8)-C(9)   | 121.6(4) | C(34)-C(33)-C(32)   | 106.0(5) |
| C(13)-C(8)-N(1)   | 117.5(4) | C(34)-C(33)-H(33A)  | 110.5    |
| C(9)-C(8)-N(1)    | 120.8(4) | C(32)-C(33)-H(33A)  | 110.5    |
| C(10)-C(9)-C(8)   | 117.7(5) | C(34)-C(33)-H(33B)  | 110.5    |
| C(10)-C(9)-C(17)  | 118.7(4) | C(32)-C(33)-H(33B)  | 110.5    |
| C(8)-C(9)-C(17)   | 123.6(4) | H(33A)-C(33)-H(33B) | 108.7    |
| C(11)-C(10)-C(9)  | 120.6(5) | C(33)-C(34)-C(35)   | 106.6(5) |
| C(11)-C(10)-H(10) | 119.7    | C(33)-C(34)-H(34A)  | 110.4    |
| C(9)-C(10)-H(10)  | 119.7    | C(35)-C(34)-H(34A)  | 110.4    |
| C(12)-C(11)-C(10) | 121.6(5) | C(33)-C(34)-H(34B)  | 110.4    |
| C(12)-C(11)-H(11) | 119.2    | C(35)-C(34)-H(34B)  | 110.4    |
| C(10)-C(11)-H(11) | 119.2    | H(34A)-C(34)-H(34B) | 108.6    |
| C(11)-C(12)-C(13) | 120.7(5) | O(2)-C(35)-C(34)    | 107.4(5) |
| C(11)-C(12)-H(12) | 119.6    | O(2)-C(35)-H(35A)   | 110.2    |
| C(13)-C(12)-H(12) | 119.6    | C(34)-C(35)-H(35A)  | 110.2    |
| C(8)-C(13)-C(12)  | 117.8(5) | O(2)-C(35)-H(35B)   | 110.2    |
| C(8)-C(13)-C(14)  | 122.3(4) | C(34)-C(35)-H(35B)  | 110.2    |
| C(12)-C(13)-C(14) | 119.8(5) | H(35A)-C(35)-H(35B) | 108.5    |
| C(16)-C(14)-C(13) | 115.2(5) | O(3)-C(36)-C(37)    | 106.1(5) |
| C(16)-C(14)-C(15) | 108.7(5) | O(3)-C(36)-H(36A)   | 110.5    |

|                     |          |                     |          |
|---------------------|----------|---------------------|----------|
| C(13)-C(14)-C(15)   | 110.8(5) | C(37)-C(36)-H(36A)  | 110.5    |
| C(16)-C(14)-H(14)   | 107.2    | O(3)-C(36)-H(36B)   | 110.5    |
| C(13)-C(14)-H(14)   | 107.2    | C(37)-C(36)-H(36B)  | 110.5    |
| C(15)-C(14)-H(14)   | 107.2    | H(36A)-C(36)-H(36B) | 108.7    |
| C(14)-C(15)-H(15A)  | 109.5    | C(36)-C(37)-C(38)   | 104.5(5) |
| C(14)-C(15)-H(15B)  | 109.5    | C(36)-C(37)-H(37A)  | 110.9    |
| H(15A)-C(15)-H(15B) | 109.5    | C(38)-C(37)-H(37A)  | 110.9    |
| C(14)-C(15)-H(15C)  | 109.5    | C(36)-C(37)-H(37B)  | 110.9    |
| H(15A)-C(15)-H(15C) | 109.5    | C(38)-C(37)-H(37B)  | 110.9    |
| H(15B)-C(15)-H(15C) | 109.5    | H(37A)-C(37)-H(37B) | 108.9    |
| C(14)-C(16)-H(16A)  | 109.5    | C(37)-C(38)-C(39)   | 103.5(5) |
| C(14)-C(16)-H(16B)  | 109.5    | C(37)-C(38)-H(38A)  | 111.1    |
| H(16A)-C(16)-H(16B) | 109.5    | C(39)-C(38)-H(38A)  | 111.1    |
| C(14)-C(16)-H(16C)  | 109.5    | C(37)-C(38)-H(38B)  | 111.1    |
| H(16A)-C(16)-H(16C) | 109.5    | C(39)-C(38)-H(38B)  | 111.1    |
| H(16B)-C(16)-H(16C) | 109.5    | H(38A)-C(38)-H(38B) | 109.0    |
| C(19)-C(17)-C(9)    | 110.7(5) | O(3)-C(39)-C(38)    | 105.7(4) |
| C(19)-C(17)-C(18)   | 110.1(5) | O(3)-C(39)-H(39A)   | 110.6    |
| C(9)-C(17)-C(18)    | 110.9(4) | C(38)-C(39)-H(39A)  | 110.6    |
| C(19)-C(17)-H(17)   | 108.4    | O(3)-C(39)-H(39B)   | 110.6    |
| C(9)-C(17)-H(17)    | 108.4    | C(38)-C(39)-H(39B)  | 110.6    |
| C(18)-C(17)-H(17)   | 108.4    | H(39A)-C(39)-H(39B) | 108.7    |

Table S4. Crystal data and structure refinement for **4d**

|                                 |                                                                                               |
|---------------------------------|-----------------------------------------------------------------------------------------------|
| Identification code             | mj22149_0m                                                                                    |
| Empirical formula               | C <sub>32</sub> H <sub>47</sub> Br <sub>3</sub> N <sub>2</sub> Ni <sub>2</sub> O <sub>3</sub> |
| Formula weight                  | 864.86                                                                                        |
| Temperature                     | 235.00 K                                                                                      |
| Wavelength                      | 1.34139 Å                                                                                     |
| Crystal system                  | Triclinic                                                                                     |
| Space group                     | P-1                                                                                           |
| Unit cell dimensions            | a = 9.1461(2) Å                                                                               |
|                                 | b = 9.5974(2) Å                                                                               |
|                                 | c = 20.7405(5) Å                                                                              |
| Volume                          | 1758.26(7) Å <sup>3</sup>                                                                     |
| Z                               | 2                                                                                             |
| Density (calculated)            | 1.634 Mg/m <sup>3</sup>                                                                       |
| Absorption coefficient          | 8.674 mm <sup>-1</sup>                                                                        |
| F(000)                          | 876                                                                                           |
| Crystal size                    | 0.07 x 0.07 x 0.05 mm <sup>3</sup>                                                            |
| Theta range for data collection | 4.048 to 55.017°.                                                                             |
| Index ranges                    | -10 ≤ h ≤ 11, -11 ≤ k ≤ 11, -25 ≤ l ≤ 25                                                      |
| Reflections collected           | 19462                                                                                         |
| Independent reflections         | 6668 [R(int) = 0.0605]                                                                        |
| Completeness to theta = 53.594° | 99.2 %                                                                                        |

|                                   |                                             |
|-----------------------------------|---------------------------------------------|
| Absorption correction             | Semi-empirical from equivalents             |
| Max. and min. transmission        | 0.7508 and 0.4483                           |
| Refinement method                 | Full-matrix least-squares on F <sup>2</sup> |
| Data / restraints / parameters    | 6668 / 0 / 387                              |
| Goodness-of-fit on F <sup>2</sup> | 1.079                                       |
| Final R indices [I>2sigma(I)]     | R1 = 0.0463, wR2 = 0.1273                   |
| R indices (all data)              | R1 = 0.0492, wR2 = 0.1302                   |
| Extinction coefficient            | n/a                                         |
| Largest diff. peak and hole       | 0.752 and -1.088 e.Å <sup>-3</sup>          |

Table S5. Bond lengths [Å] for **4d**

|             |           |              |          |
|-------------|-----------|--------------|----------|
| Br(1)-Ni(1) | 2.4215(5) | C(13)-C(14)  | 1.406(5) |
| Br(2)-Ni(1) | 2.4574(5) | C(14)-C(15)  | 1.488(6) |
| Br(2)-Ni(2) | 2.5337(5) | C(15)-H(15A) | 0.9700   |
| Br(3)-Ni(2) | 2.4119(6) | C(15)-H(15B) | 0.9700   |
| Ni(1)-O(1)  | 1.979(2)  | C(15)-H(15C) | 0.9700   |
| Ni(1)-O(2)  | 2.081(2)  | C(16)-H(16A) | 0.9700   |
| Ni(1)-N(1)  | 2.040(3)  | C(16)-H(16B) | 0.9700   |
| Ni(2)-O(1)  | 2.024(2)  | C(16)-H(16C) | 0.9700   |
| Ni(2)-O(3)  | 2.137(2)  | C(17)-C(18)  | 1.386(5) |
| Ni(2)-N(2)  | 2.007(3)  | C(17)-C(22)  | 1.396(5) |
| O(1)-C(1)   | 1.388(3)  | C(18)-C(19)  | 1.393(5) |
| O(2)-C(25)  | 1.430(6)  | C(18)-C(24)  | 1.500(5) |
| O(2)-C(28)  | 1.441(4)  | C(19)-H(19)  | 0.9400   |
| O(3)-C(29)  | 1.433(4)  | C(19)-C(20)  | 1.375(6) |
| O(3)-C(32)  | 1.453(5)  | C(20)-H(20)  | 0.9400   |
| N(1)-C(2)   | 1.286(4)  | C(20)-C(21)  | 1.368(6) |
| N(1)-C(9)   | 1.446(4)  | C(21)-H(21)  | 0.9400   |
| N(2)-C(4)   | 1.290(4)  | C(21)-C(22)  | 1.396(5) |
| N(2)-C(17)  | 1.458(4)  | C(22)-C(23)  | 1.505(6) |
| C(1)-C(2)   | 1.545(4)  | C(23)-H(23A) | 0.9700   |
| C(1)-C(4)   | 1.546(4)  | C(23)-H(23B) | 0.9700   |
| C(1)-C(6)   | 1.573(4)  | C(23)-H(23C) | 0.9700   |
| C(2)-C(3)   | 1.497(4)  | C(24)-H(24A) | 0.9700   |
| C(3)-H(3A)  | 0.9700    | C(24)-H(24B) | 0.9700   |
| C(3)-H(3B)  | 0.9700    | C(24)-H(24C) | 0.9700   |
| C(3)-H(3C)  | 0.9700    | C(25)-H(25A) | 0.9800   |
| C(4)-C(5)   | 1.493(5)  | C(25)-H(25B) | 0.9800   |
| C(5)-H(5A)  | 0.9700    | C(25)-C(26)  | 1.526(6) |
| C(5)-H(5B)  | 0.9700    | C(26)-H(26A) | 0.9800   |
| C(5)-H(5C)  | 0.9700    | C(26)-H(26B) | 0.9800   |
| C(6)-H(6)   | 0.9900    | C(26)-C(27)  | 1.478(7) |
| C(6)-C(7)   | 1.506(5)  | C(27)-H(27A) | 0.9800   |
| C(6)-C(8)   | 1.530(5)  | C(27)-H(27B) | 0.9800   |
| C(7)-H(7A)  | 0.9700    | C(27)-C(28)  | 1.519(7) |

|             |          |              |          |
|-------------|----------|--------------|----------|
| C(7)-H(7B)  | 0.9700   | C(28)-H(28A) | 0.9800   |
| C(7)-H(7C)  | 0.9700   | C(28)-H(28B) | 0.9800   |
| C(8)-H(8A)  | 0.9700   | C(29)-H(29A) | 0.9800   |
| C(8)-H(8B)  | 0.9700   | C(29)-H(29B) | 0.9800   |
| C(8)-H(8C)  | 0.9700   | C(29)-C(30)  | 1.505(6) |
| C(9)-C(10)  | 1.396(5) | C(30)-H(30A) | 0.9800   |
| C(9)-C(14)  | 1.391(5) | C(30)-H(30B) | 0.9800   |
| C(10)-C(11) | 1.395(6) | C(30)-C(31)  | 1.450(7) |
| C(10)-C(16) | 1.493(6) | C(31)-H(31A) | 0.9800   |
| C(11)-H(11) | 0.9400   | C(31)-H(31B) | 0.9800   |
| C(11)-C(12) | 1.383(8) | C(31)-C(32)  | 1.440(6) |
| C(12)-H(12) | 0.9400   | C(32)-H(32A) | 0.9800   |
| C(12)-C(13) | 1.378(7) | C(32)-H(32B) | 0.9800   |
| C(13)-H(13) | 0.9400   |              |          |

Table S6. Bond angles [°] for **4d**

|                   |             |                     |          |
|-------------------|-------------|---------------------|----------|
| Ni(1)-Br(2)-Ni(2) | 77.619(17)  | C(9)-C(14)-C(13)    | 116.8(4) |
| Br(1)-Ni(1)-Br(2) | 100.924(19) | C(9)-C(14)-C(15)    | 122.9(3) |
| O(1)-Ni(1)-Br(1)  | 169.83(6)   | C(13)-C(14)-C(15)   | 120.3(4) |
| O(1)-Ni(1)-Br(2)  | 88.79(6)    | C(14)-C(15)-H(15A)  | 109.5    |
| O(1)-Ni(1)-O(2)   | 85.46(9)    | C(14)-C(15)-H(15B)  | 109.5    |
| O(1)-Ni(1)-N(1)   | 80.10(9)    | C(14)-C(15)-H(15C)  | 109.5    |
| O(2)-Ni(1)-Br(1)  | 90.45(7)    | H(15A)-C(15)-H(15B) | 109.5    |
| O(2)-Ni(1)-Br(2)  | 96.23(8)    | H(15A)-C(15)-H(15C) | 109.5    |
| N(1)-Ni(1)-Br(1)  | 99.78(8)    | H(15B)-C(15)-H(15C) | 109.5    |
| N(1)-Ni(1)-Br(2)  | 106.44(8)   | C(10)-C(16)-H(16A)  | 109.5    |
| N(1)-Ni(1)-O(2)   | 152.70(11)  | C(10)-C(16)-H(16B)  | 109.5    |
| Br(3)-Ni(2)-Br(2) | 132.48(2)   | C(10)-C(16)-H(16C)  | 109.5    |
| O(1)-Ni(2)-Br(2)  | 85.70(6)    | H(16A)-C(16)-H(16B) | 109.5    |
| O(1)-Ni(2)-Br(3)  | 97.69(6)    | H(16A)-C(16)-H(16C) | 109.5    |
| O(1)-Ni(2)-O(3)   | 170.29(9)   | H(16B)-C(16)-H(16C) | 109.5    |
| O(3)-Ni(2)-Br(2)  | 87.97(7)    | C(18)-C(17)-N(2)    | 118.4(3) |
| O(3)-Ni(2)-Br(3)  | 92.02(7)    | C(18)-C(17)-C(22)   | 122.2(3) |
| N(2)-Ni(2)-Br(2)  | 112.06(7)   | C(22)-C(17)-N(2)    | 119.3(3) |
| N(2)-Ni(2)-Br(3)  | 115.21(7)   | C(17)-C(18)-C(19)   | 118.0(3) |
| N(2)-Ni(2)-O(1)   | 79.97(9)    | C(17)-C(18)-C(24)   | 121.3(3) |
| N(2)-Ni(2)-O(3)   | 95.64(10)   | C(19)-C(18)-C(24)   | 120.7(3) |
| Ni(1)-O(1)-Ni(2)  | 102.79(9)   | C(18)-C(19)-H(19)   | 119.6    |
| C(1)-O(1)-Ni(1)   | 117.77(18)  | C(20)-C(19)-C(18)   | 120.9(4) |
| C(1)-O(1)-Ni(2)   | 116.39(17)  | C(20)-C(19)-H(19)   | 119.6    |
| C(25)-O(2)-Ni(1)  | 116.8(2)    | C(19)-C(20)-H(20)   | 119.9    |
| C(25)-O(2)-C(28)  | 110.0(3)    | C(21)-C(20)-C(19)   | 120.3(4) |
| C(28)-O(2)-Ni(1)  | 125.0(3)    | C(21)-C(20)-H(20)   | 119.9    |
| C(29)-O(3)-Ni(2)  | 130.0(2)    | C(20)-C(21)-H(21)   | 119.4    |
| C(29)-O(3)-C(32)  | 107.0(3)    | C(20)-C(21)-C(22)   | 121.2(4) |
| C(32)-O(3)-Ni(2)  | 122.8(2)    | C(22)-C(21)-H(21)   | 119.4    |

|                  |          |                     |          |
|------------------|----------|---------------------|----------|
| C(2)-N(1)-Ni(1)  | 116.1(2) | C(17)-C(22)-C(23)   | 122.0(3) |
| C(2)-N(1)-C(9)   | 119.9(3) | C(21)-C(22)-C(17)   | 117.5(4) |
| C(9)-N(1)-Ni(1)  | 123.8(2) | C(21)-C(22)-C(23)   | 120.5(3) |
| C(4)-N(2)-Ni(2)  | 117.6(2) | C(22)-C(23)-H(23A)  | 109.5    |
| C(4)-N(2)-C(17)  | 120.2(3) | C(22)-C(23)-H(23B)  | 109.5    |
| C(17)-N(2)-Ni(2) | 122.2(2) | C(22)-C(23)-H(23C)  | 109.5    |
| O(1)-C(1)-C(2)   | 109.8(2) | H(23A)-C(23)-H(23B) | 109.5    |
| O(1)-C(1)-C(4)   | 110.2(2) | H(23A)-C(23)-H(23C) | 109.5    |
| O(1)-C(1)-C(6)   | 109.8(2) | H(23B)-C(23)-H(23C) | 109.5    |
| C(2)-C(1)-C(4)   | 110.4(3) | C(18)-C(24)-H(24A)  | 109.5    |
| C(2)-C(1)-C(6)   | 108.5(2) | C(18)-C(24)-H(24B)  | 109.5    |
| C(4)-C(1)-C(6)   | 108.1(2) | C(18)-C(24)-H(24C)  | 109.5    |
| N(1)-C(2)-C(1)   | 116.1(3) | H(24A)-C(24)-H(24B) | 109.5    |
| N(1)-C(2)-C(3)   | 122.2(3) | H(24A)-C(24)-H(24C) | 109.5    |
| C(3)-C(2)-C(1)   | 121.5(3) | H(24B)-C(24)-H(24C) | 109.5    |
| C(2)-C(3)-H(3A)  | 109.5    | O(2)-C(25)-H(25A)   | 110.6    |
| C(2)-C(3)-H(3B)  | 109.5    | O(2)-C(25)-H(25B)   | 110.6    |
| C(2)-C(3)-H(3C)  | 109.5    | O(2)-C(25)-C(26)    | 105.6(4) |
| H(3A)-C(3)-H(3B) | 109.5    | H(25A)-C(25)-H(25B) | 108.7    |
| H(3A)-C(3)-H(3C) | 109.5    | C(26)-C(25)-H(25A)  | 110.6    |
| H(3B)-C(3)-H(3C) | 109.5    | C(26)-C(25)-H(25B)  | 110.6    |
| N(2)-C(4)-C(1)   | 115.9(3) | C(25)-C(26)-H(26A)  | 111.2    |
| N(2)-C(4)-C(5)   | 122.3(3) | C(25)-C(26)-H(26B)  | 111.2    |
| C(5)-C(4)-C(1)   | 121.8(3) | H(26A)-C(26)-H(26B) | 109.1    |
| C(4)-C(5)-H(5A)  | 109.5    | C(27)-C(26)-C(25)   | 102.7(4) |
| C(4)-C(5)-H(5B)  | 109.5    | C(27)-C(26)-H(26A)  | 111.2    |
| C(4)-C(5)-H(5C)  | 109.5    | C(27)-C(26)-H(26B)  | 111.2    |
| H(5A)-C(5)-H(5B) | 109.5    | C(26)-C(27)-H(27A)  | 111.2    |
| H(5A)-C(5)-H(5C) | 109.5    | C(26)-C(27)-H(27B)  | 111.2    |
| H(5B)-C(5)-H(5C) | 109.5    | C(26)-C(27)-C(28)   | 102.7(4) |
| C(1)-C(6)-H(6)   | 108.5    | H(27A)-C(27)-H(27B) | 109.1    |
| C(7)-C(6)-C(1)   | 111.1(3) | C(28)-C(27)-H(27A)  | 111.2    |
| C(7)-C(6)-H(6)   | 108.5    | C(28)-C(27)-H(27B)  | 111.2    |
| C(7)-C(6)-C(8)   | 109.3(3) | O(2)-C(28)-C(27)    | 104.0(4) |
| C(8)-C(6)-C(1)   | 110.7(3) | O(2)-C(28)-H(28A)   | 111.0    |
| C(8)-C(6)-H(6)   | 108.5    | O(2)-C(28)-H(28B)   | 111.0    |
| C(6)-C(7)-H(7A)  | 109.5    | C(27)-C(28)-H(28A)  | 111.0    |
| C(6)-C(7)-H(7B)  | 109.5    | C(27)-C(28)-H(28B)  | 111.0    |
| C(6)-C(7)-H(7C)  | 109.5    | H(28A)-C(28)-H(28B) | 109.0    |
| H(7A)-C(7)-H(7B) | 109.5    | O(3)-C(29)-H(29A)   | 110.4    |
| H(7A)-C(7)-H(7C) | 109.5    | O(3)-C(29)-H(29B)   | 110.4    |
| H(7B)-C(7)-H(7C) | 109.5    | O(3)-C(29)-C(30)    | 106.6(4) |
| C(6)-C(8)-H(8A)  | 109.5    | H(29A)-C(29)-H(29B) | 108.6    |
| C(6)-C(8)-H(8B)  | 109.5    | C(30)-C(29)-H(29A)  | 110.4    |
| C(6)-C(8)-H(8C)  | 109.5    | C(30)-C(29)-H(29B)  | 110.4    |
| H(8A)-C(8)-H(8B) | 109.5    | C(29)-C(30)-H(30A)  | 110.6    |
| H(8A)-C(8)-H(8C) | 109.5    | C(29)-C(30)-H(30B)  | 110.6    |

|                   |          |                     |          |
|-------------------|----------|---------------------|----------|
| H(8B)-C(8)-H(8C)  | 109.5    | H(30A)-C(30)-H(30B) | 108.8    |
| C(10)-C(9)-N(1)   | 118.2(3) | C(31)-C(30)-C(29)   | 105.5(4) |
| C(14)-C(9)-N(1)   | 118.5(3) | C(31)-C(30)-H(30A)  | 110.6    |
| C(14)-C(9)-C(10)  | 123.2(3) | C(31)-C(30)-H(30B)  | 110.6    |
| C(9)-C(10)-C(16)  | 122.7(3) | C(30)-C(31)-H(31A)  | 109.9    |
| C(11)-C(10)-C(9)  | 117.6(4) | C(30)-C(31)-H(31B)  | 109.9    |
| C(11)-C(10)-C(16) | 119.7(4) | H(31A)-C(31)-H(31B) | 108.3    |
| C(10)-C(11)-H(11) | 119.6    | C(32)-C(31)-C(30)   | 108.9(4) |
| C(12)-C(11)-C(10) | 120.9(4) | C(32)-C(31)-H(31A)  | 109.9    |
| C(12)-C(11)-H(11) | 119.6    | C(32)-C(31)-H(31B)  | 109.9    |
| C(11)-C(12)-H(12) | 119.9    | O(3)-C(32)-H(32A)   | 110.3    |
| C(13)-C(12)-C(11) | 120.1(4) | O(3)-C(32)-H(32B)   | 110.3    |
| C(13)-C(12)-H(12) | 119.9    | C(31)-C(32)-O(3)    | 106.9(4) |
| C(12)-C(13)-H(13) | 119.3    | C(31)-C(32)-H(32A)  | 110.3    |
| C(12)-C(13)-C(14) | 121.4(5) | C(31)-C(32)-H(32B)  | 110.3    |
| C(14)-C(13)-H(13) | 119.3    | H(32A)-C(32)-H(32B) | 108.6    |

## References

- [1] J. Zhang, H. Gao, Z. Ke, F. Bao, F. Zhu, Q. Wu, Investigation of 1-hexene isomerization and oligomerization catalyzed with  $\beta$ -diketiminato Ni(II) bromide complexes/methylaluminumoxane system, *J. Mol. Catal. A: Chem.*, 231 (2005) 27-34.
- [2] M. Tripathi, V. Regnier, Z. Ziani, M. Devillard, C. Philouze, D. Martin, Metal free oxidation of vinamidine derivatives: a simple synthesis of  $\alpha$ -keto- $\beta$ -diimine ligands, *RSC Adv.*, 8 (2018) 38346-38350.
- [3] G. Ji, Z. Chen, X.-Y. Wang, X.-S. Ning, C.-J. Xu, X.-M. Zhang, W.-J. Tao, J.-F. Li, Y. Gao, Q. Shen, X.-L. Sun, H.-Y. Wang, J.-B. Zhao, B. Zhang, Y.-L. Guo, Y. Zhao, J. Sun, Y. Luo, Y. Tang, Direct Copolymerization of Ethylene with Protic Comonomers Enabled by Multinuclear Ni Catalysts, *Nat. Commun.*, 12 (2021) 6283.
- [4] J.-i. Imuta, N. Kashiwa, Y. Toda, Catalytic Regioselective Introduction of Allyl Alcohol into the Nonpolar Polyolefins: Development of One-Pot Synthesis of Hydroxyl-Capped Polyolefins Mediated by a New Metallocene IF Catalyst, *J. Am. Chem. Soc.*, 124 (2002) 1176-1177.
- [5] S. Ito, M. Kanazawa, K. Munakata, J.-i. Kuroda, Y. Okumura, K. Nozaki, Coordination–Insertion Copolymerization of Allyl Monomers with Ethylene, *J. Am. Chem. Soc.*, 133 (2011) 1232-1235.
- [6] M. Li, X. Wang, Y. Luo, C. Chen, A Second-Coordination-Sphere Strategy to Modulate Nickel- and Palladium-Catalyzed Olefin Polymerization and Copolymerization, *Angew. Chem. Int. Ed.*, 56 (2017) 11604-11609.

- [7] T. Wiedemann, G. Voit, A. Tchernook, P. Roesle, I. Gottker-Schnetmann, S. Mecking, Monofunctional Hyperbranched Ethylene Oligomers, *J. Am. Chem. Soc.*, 136 (2014) 2078-2085.
- [8] Y. Gao, J. Chen, Y. Wang, D. Pickens, A. Motta, Q.J. Wang, Y.-W. Chung, T.L. Lohr, T.J. Marks, Highly Branched Polyethylene Oligomers via Single-Site Polymerization in Very Nonpolar Media, *Nat. Catal.*, 2 (2019) 236-242.
- [9] C. Obuah, B. Omondi, K. Nozaki, J. Darkwa, Solvent and Co-catalyst Dependent Pyrazolylpyridinamine and Pyrazolylpyrroleamine Nickel(II) Catalyzed Oligomerization and Polymerization of Ethylene, *J. Mol. Catal. A: Chem.*, 382 (2014) 31-40.
- [10] G. Si, Y. Na, C. Chen, Ethylene (co)Oligomerization by Phosphine-Pyridine Based Palladium and Nickel Catalysts, *ChemCatChem*, 10 (2018) 5135-5140.
- [11] X. Ma, X. Hu, Y. Zhang, H. Mu, L. Cui, Z. Jian, Preparation and In Situ Chain-End-Functionalization of Branched Ethylene Oligomers by Monosubstituted  $\alpha$ -Diimine Nickel Catalysts, *Polym. Chem.*, 10 (2019) 2596-2607.
- [12] S.V. Zubkevich, V.A. Tuskaev, S.C. Gagieva, A.A. Pavlov, V.N. Khrustalev, F. Wang, L. Pan, Y. Li, D. Saracheno, A.A. Vikhrov, D.N. Zarubin, B.M. Bulychev, Trapping the Short-Chain Odd Carbon Number Olefins Using Nickel(II)-Catalyzed Tandem Ethylene Oligomerization and Friedel-Crafts Alkylation of Toluene, *Chin. J. Chem.*, 41 (2023) 2855-2865.
